# Supplementary material for: Theoretical study of the F(2P) + NH3→ HF + NH2reaction on an accurate potential energy surface: dynamics and kinetics
Source: Royal Society of Chemistry journal article supplement (doi:10.1039/c9cp02113b), 2019-01-01
Supplement: c9cp02113b1.pdf [file c9cp02113b1.pdf]

```
!      NH3 + F potential energy surface
!      atom order : N-H-H-H-F
!      unit:          INPUT: Angstrom   OUTPUT: eV
!      Total 41282 UCCSD(T)-F12/aug-cc-pVTZ points by FI-NN
!      Fitting RMSE=5.656 meV
!      subroutine PREPOT must be called first
!      The PES is constructed by Li Tian and Hongwei Song
!      Email: hwsong@wipm.ac.cn
!      updated on May 8 2019
!
      subroutine fnh3_finn(cart,VOUT)
      implicit none

      integer,parameter :: natom=5
      real*8 ,parameter :: alpha=1.d0
      real*8  cart(3,natom),rb(10),rx(10)
      real*8  RT(20),VOUT

      call coor_bond(cart,rb)
      rx(:)= dexp(-rb(:)/(alpha))
      call fi_a3bc(rx,RT)
      call NNPOT(RT,VOUT)

      end

!      NNPEs PARAMETERS INFO.
!      MULTIDIMENSION ARRAYS ARE ARRANGED BY ... NEUROS, LAYERS, NPES,
DISTRICTS

      MODULE NNDATA
      IMPLICIT NONE
      INTEGER :: NA,DIN,NLAYS,NPES
      INTEGER,ALLOCATABLE :: NEU(:)
      REAL*8,ALLOCATABLE :: X RANGE (:, :, :),Y RANGE (:, :),W (:, :, :, :),
& B (:, :, :),RLI (:, :, :)
      CHARACTER*100 :: PFNAME
      END MODULE

!      READ ALL PARA.dat

      SUBROUTINE PREPOT
      USE NNDATA
      IMPLICIT NONE

      INTEGER :: IPES,ILAYS
```

```

OPEN(10, FILE=' PARA. dat' , STATUS=' OLD' )
READ(10, *) NA, DIN, NLAYS, NPES

ALLOCATE (NEU (NLAYS+1))
NEU(1)=DIN
READ(10, *) NEU (2:NLAYS+1)

ALLOCATE (XRANGE (2, DIN, NPES))
ALLOCATE (YRANGE (2, NPES))
ALLOCATE (W (MAXVAL (NEU) , MAXVAL (NEU) , NLAYS, NPES))
ALLOCATE (B (MAXVAL (NEU) , NLAYS, NPES))
ALLOCATE (RLI (MAXVAL (NEU) , NLAYS+1, NPES))

XRANGE=0. D0
YRANGE=0. D0
W=0. D0
B=0. D0
RLI=0. D0
IPES=0; ILAYS=0

DO IPES=1, NPES
  READ(10, *) PFNAME
  OPEN(11, FILE=PFNAME, STATUS=' OLD' )
  DO ILAYS=1, NLAYS
    READ(11, *) W(1:NEU(ILAYS), 1:NEU(ILAYS+1), ILAYS, IPES)
    READ(11, *)
    READ(11, *) B(1:NEU(ILAYS+1), ILAYS, IPES)
    READ(11, *)
  ENDDO
  READ(11, *) XRANGE(:, :, IPES)
  READ(11, *)
  READ(11, *) YRANGE(:, IPES)
  CLOSE(11)
ENDDO
CLOSE(10)

RETURN
END

!
FI-NN fit F+NH3 PES

SUBROUTINE NNPOT(R, VOUT) !R/ANGSTROM, VOUT/EV
USE NNDATA
IMPLICIT NONE
REAL*8, INTENT(IN) :: R(DIN)
REAL*8 V(NPES)

```

```

REAL*8 VOUT
INTEGER :: IP, I, J, K, jjj
REAL*8 :: VFIT, TEST

DO IP=1, NPES

! INPUT LAYER

DO I=1, DIN
  RLI(I, 1, IP)=2. D0*(R(I)-XRANGE(1, I, IP))/(XRANGE(2, I, IP)
&      -XRANGE(1, I, IP))-1. D0
ENDDO

! layer 1-3

DO I=1, NLAYS
  RLI(1:NEU(I+1), I+1, IP)=B(1:NEU(I+1), I, IP)
  DO J=1, NEU(I+1)
    IF (I==NLAYS) THEN
      DO K=1, NEU(I)
        RLI(J, I+1, IP)=RLI(J, I+1, IP)+W(K, J, I, IP)
&          *RLI(K, I, IP)
      ENDDO
    ELSE
      DO K=1, NEU(I)
        RLI(J, I+1, IP)=RLI(J, I+1, IP)+W(K, J, I, IP)
&          *RLI(K, I, IP)
      ENDDO
    TEST=-2. D0*RLI(J, I+1, IP)
    IF(TEST<-100. D0) THEN
      RLI(J, I+1, IP)=1. D0
    ELSE IF(TEST>-100. D0 .AND. TEST<100. D0) THEN
      RLI(J, I+1, IP)=2. D0/(1. D0+EXP(TEST ))-1. D0
    ELSE
      RLI(J, I+1, IP)=-1. D0
    ENDIF
  ENDDO
  ENDDO
  VFIT=RLI(1, NLAYS+1, IP)
  V(IP)=0. 5D0*(VFIT+1. D0)*(YRANGE(2, IP)-YRANGE(1, IP))
&      +YRANGE(1, IP)
ENDDO

VOUT=0. D0

```

```

DO I=1, NPES
  VOUT=VOUT+V(I)          ! V average, uint in eV
ENDDO
VOUT=VOUT/(NPES*1.D0)-1.13519834d0

RETURN
END

```

```
!*****
```

```

SUBROUTINE DESTRUCT
USE NNDATA

DEALLOCATE(W)
DEALLOCATE(RLI)
DEALLOCATE(B)
DEALLOCATE(NEU)
DEALLOCATE(XRANGE)

```

```

RETURN
END

```

```
!*****
```

```

subroutine coor_bond(cart, rb)
implicit none
integer, parameter::natom=5, ndim=10
real*8 cart(3, natom), cart1(3, natom)
real*8 rx(3, ndim), rb(ndim)
integer i, j, k

```

```

!   order N-H-H-H-F --> H-H-H-N-F (a3bc)
cart1(:, 1)=cart(:, 2)
cart1(:, 2)=cart(:, 3)
cart1(:, 3)=cart(:, 4)
cart1(:, 4)=cart(:, 1)
cart1(:, 5)=cart(:, 5)

```

```
!-----
```

```

k=0
do i=1, natom-1
  do j=i+1, natom
    k=k+1
    rx(:, k)=cart1(:, i)-cart1(:, j)
  enddo
enddo
if(k.ne.10)stop 'error in bond dimension'
do i=1, ndim
  rb(i)=dsqrt(dot_product(rx(:, i), rx(:, i)))

```

```

        enddo

    end

!*****
    subroutine fi_a3bc(r,p)
! compute the fundamental invariants
! atom order : A A A B C
! r (input) real(kind=8) the internuclear distances
! p (output) real(kind=8) the fundamental invariants
    implicit none
    real(kind=8),intent(in) :: r(10)
    real(kind=8),intent(out) :: p(20)
    p(1)=r(1)+r(2)+r(5)
    p(2)=r(3)+r(8)+r(6)
    p(3)=r(4)+r(9)+r(7)
    p(4)=r(1)**2+r(2)**2+r(5)**2
    p(5)=r(3)**2+r(8)**2+r(6)**2
    p(6)=r(4)**2+r(9)**2+r(7)**2
    p(7)=r(1)*r(3)+r(2)*r(3)+r(2)*r(8)+r(5)*r(8)+r(5)*r(6)+r(1)*r(6)
    p(8)=r(1)*r(4)+r(2)*r(4)+r(2)*r(9)+r(5)*r(9)+r(5)*r(7)+r(1)*r(7)
    p(9)=r(3)*r(4)+r(8)*r(9)+r(6)*r(7)
    p(10)=r(1)**3+r(2)**3+r(5)**3
    p(11)=r(3)**3+r(8)**3+r(6)**3
    p(12)=r(4)**3+r(9)**3+r(7)**3
    p(13)=r(1)**2*r(3)+r(2)**2*r(3)+r(2)**2*r(8)+r(5)**2*r(8)+
&      r(5)**2*r(6)+r(1)**2*r(6)
    p(14)=r(1)**2*r(4)+r(2)**2*r(4)+r(2)**2*r(9)+r(5)**2*r(9)+
&      r(5)**2*r(7)+r(1)**2*r(7)
    p(15)=r(3)**2*r(4)+r(8)**2*r(9)+r(6)**2*r(7)
    p(16)=r(3)**2*r(5)+r(1)*r(8)**2+r(2)*r(6)**2
    p(17)=r(4)**2*r(5)+r(1)*r(9)**2+r(2)*r(7)**2
    p(18)=r(4)**2*r(6)+r(4)**2*r(8)+r(3)*r(9)**2+r(6)*r(9)**2+
&      r(7)**2*r(8)+r(3)*r(7)**2
    p(19)=r(1)*r(3)*r(4)+r(2)*r(3)*r(4)+r(2)*r(8)*r(9)+
&      r(5)*r(8)*r(9)+r(5)*r(6)*r(7)+r(1)*r(6)*r(7)
    p(20)=r(10)
    end subroutine fi_a3bc

```

PARA. dat

```

5, 20, 3, 4
30, 60, 1
"W006. txt"
"W015. txt"
"W200. txt"
"W320. txt"

```

W006. txt

-5. 232054449827368E-002  
-1. 11994433261305  
-0. 241366777507621  
0. 310023401095520  
1. 49335381026170  
0. 276357571121476  
0. 190310658078704  
0. 949825786019649  
0. 192736301518629  
0. 337910970878224  
-0. 641974537051980  
-0. 333281353877735  
0. 216939067040036  
-0. 520859812468456  
0. 206858667798137  
-0. 209634782039845  
-8. 656353517097812E-002  
7. 581157802530934E-002  
-1. 06115691066035  
-0. 104161029600232  
0. 579198708567550  
0. 539514946210857  
-3. 715246843054590E-002  
-4. 460184886747508E-003  
-0. 614754016932032  
0. 200504655610290  
-0. 163732652046926  
-0. 206196791600922  
0. 228966812331278  
-0. 495757052296831  
0. 123785866496103  
-8. 600212906503883E-002  
0. 210966894560823  
9. 159146959672415E-002  
-0. 145928104555161  
-0. 139209994947150  
0. 152631299549880  
-0. 207774230014683  
0. 122416368343420  
5. 519960478171939E-002  
-0. 712214804135732  
-1. 23656337915537  
0. 747571850646745  
-1. 19072141635623

1. 01106369988468  
-0. 348541448118980  
2. 31957945639177  
-0. 504996016988902  
0. 104448613455738  
1. 56829831899033  
-0. 404683889467469  
1. 54343880763640  
-1. 20695010703887  
0. 562925010944787  
0. 149036366201165  
0. 210765842060372  
-0. 452959502863298  
1. 25759660511172  
-0. 983167122982068  
-4. 015010400790863E-003  
-0. 300771416714070  
-0. 169525878006140  
0. 693808489363254  
0. 357750526026746  
2. 16043271445029  
-0. 287470352846609  
-1. 74707047337096  
0. 408517576432786  
-0. 451887745245707  
-0. 311908946412186  
-1. 04914338048502  
-0. 156936832544340  
0. 616914160803912  
4. 525613570617032E-002  
-1. 573566795321938E-002  
0. 100843744463413  
-8. 527167469659029E-002  
-0. 291347440666321  
-3. 526814507180840E-002  
-0. 378726026706171  
-0. 646810851342028  
0. 832859144065491  
0. 613005361775954  
7. 030265785088111E-002  
-0. 975694370648080  
-0. 489761036822397  
1. 03466713448262  
-0. 481873775449135  
-0. 226742773588577  
-9. 603349267684837E-002

0. 280865932009972  
0. 284628496447357  
-3. 349212156034491E-002  
7. 057844679558564E-002  
2. 434980092457745E-002  
0. 359556749384441  
-0. 125974802826579  
-0. 150491175618608  
5. 402955493592404E-002  
-0. 103850118929249  
0. 194016801799053  
-0. 414795730775315  
-7. 314183411753926E-002  
-0. 117348424022177  
0. 553108546615051  
-1. 24405874406132  
0. 359179636422830  
0. 801947577934940  
-0. 749928700970225  
1. 483172475353179E-002  
-0. 301732827631914  
1. 08305465816828  
4. 960882980627449E-003  
-5. 236024694583166E-002  
0. 704690741034949  
-6. 901885191522664E-002  
5. 223516477253703E-002  
0. 731740301851545  
-0. 836837950926777  
-0. 100517705717724  
8. 447093287332302E-002  
7. 154637698296532E-002  
-0. 286377758656843  
-1. 00331889006225  
-0. 147463119856727  
3. 819043558691364E-002  
1. 47398822675093  
-0. 135892067113561  
-0. 174713886281063  
0. 748390274953208  
3. 905435211776331E-002  
0. 137813367306696  
-0. 670722406148718  
0. 204097047270701  
9. 065356567641856E-003  
0. 170270590207785



0. 109415441218874  
-0. 134533853644175  
4. 951631735370290E-002  
-4. 805613992478341E-002  
-0. 463701107222435  
-0. 476732744085738  
-2. 45277174396294  
-0. 419132237441026  
1. 42677521520925  
3. 37009949959057  
-0. 191385125979260  
0. 665581891772117  
-0. 523189380679274  
0. 116097697692141  
-0. 587200259580753  
-1. 45712277370951  
0. 362422070201637  
-0. 151374888851847  
4. 986029516315665E-003  
0. 111870470238562  
3. 779921805132641E-002  
-0. 286757855284515  
2. 189138282874120E-003  
-0. 324967986358892  
-1. 04442769354491  
-0. 200733175185117  
0. 253997689615595  
0. 422879312482196  
-0. 744301854706294  
0. 935050402367942  
1. 54572418853061  
-0. 555341019843824  
0. 795001496113047  
-0. 125249650403419  
0. 250418768922982  
-0. 141576253936407  
-0. 270141588980793  
-0. 190070631464544  
-0. 393766828175269  
3. 804801931497723E-002  
-0. 202963772039952  
-0. 190197501753759  
-1. 087779881882095E-002  
-0. 212503605187648  
-0. 574318971623035  
-0. 270815962200190

-1. 638371191768151E-002  
-0. 702434725946123  
0. 807766214415470  
0. 888701328160426  
1. 31798654640147  
-0. 416902110449075  
-0. 610199357492250  
0. 606615381823080  
0. 170062619357228  
-0. 133585232027202  
-0. 810050580783253  
0. 710548480317969  
-3. 292657747985377E-002  
-0. 338211274987797  
1. 47844767166378  
-1. 21133262897514  
0. 202369381315769  
0. 107604321397867  
-0. 319356441008690  
0. 739187015269030  
-0. 851402047703305  
0. 106198498258984  
0. 103571002678518  
1. 34113609718933  
-0. 761678307267372  
1. 64430849433592  
-1. 49782174754971  
0. 617273633888601  
0. 189668169370575  
-0. 590801363840631  
-0. 422767464407375  
-1. 28658355185285  
0. 110414470622087  
-6. 508252416272717E-002  
-0. 233328228493256  
-0. 432995991286696  
1. 38532492179968  
0. 734506136899110  
0. 237845304101920  
-1. 34086927599707  
0. 485648458388168  
-0. 648936243567540  
-0. 118698135769746  
0. 732323515255474  
1. 83202086686062  
-1. 10738671108967

0. 461296074777361  
1. 02047606050039  
0. 182270671127535  
-0. 382223452168916  
-1. 05421115821390  
0. 279634949478131  
-0. 223068276491374  
4. 031079972163825E-002  
-0. 144116982263445  
-6. 715087246002668E-003  
-0. 118045771229971  
-9. 503857684989545E-002  
0. 405868239784590  
1. 01306060832006  
-0. 597780780536794  
-0. 282792036535911  
-0. 940608626566271  
0. 733132116250540  
-0. 867054197284794  
0. 625926009685605  
-0. 360188826747859  
-6. 034893096403360E-002  
0. 541496580374075  
-0. 101538189237900  
0. 349869137744187  
-0. 217504292548831  
8. 093046498378521E-002  
-0. 151970345272995  
0. 318973078049381  
-0. 318927131488837  
0. 193101684529694  
0. 168902496392710  
1. 07330647900055  
-0. 269129000198814  
-1. 13484792307992  
-0. 477875396846362  
-0. 531749236157985  
0. 685167984722581  
1. 19253275485829  
-0. 763229264749508  
0. 235435339433599  
4. 452690154764700E-002  
0. 215383198889374  
-0. 317399636098339  
-0. 206715914826738  
0. 230992279267690

-2. 003661411089678E-002  
8. 776300853405777E-002  
-0. 257792525040829  
0. 242208440045643  
-0. 165722265554706  
-4. 957840513507260E-002  
-0. 763416833455823  
0. 518652875845191  
-0. 345913784956111  
-8. 675263967026493E-002  
4. 856036633430140E-002  
-0. 552092049101894  
-0. 557758401608800  
0. 655540988805659  
-0. 955041374819977  
0. 406384198550921  
-0. 270877375816656  
0. 264905881685035  
7. 233499353107335E-002  
-0. 637563089012607  
0. 242144180986359  
0. 119615450378853  
0. 222844870221671  
0. 236232579606852  
0. 866942445567835  
0. 101213548668495  
0. 724731074300910  
1. 47628295035595  
-1. 87310198756104  
-0. 546622763660967  
-1. 24504363267013  
0. 256944213024186  
-0. 928905645823136  
3. 09662234139721  
-1. 67647354465381  
1. 21312393227186  
0. 457986407818438  
0. 253313119054821  
-0. 648996283325965  
-1. 22140709694218  
1. 26477937482783  
0. 380615295186021  
-1. 08481550371617  
-0. 201031354167945  
-0. 203970830016886  
0. 374220819772685

0. 633447175698591  
-1. 37070868250607  
0. 537910472484367  
0. 154225058828837  
0. 120972816382323  
-1. 37523234489737  
2. 71335045202756  
-2. 26154701887732  
0. 349924700192222  
1. 68481220252494  
3. 406132391197566E-002  
1. 06352982937323  
-2. 10968561704142  
1. 02837940869861  
0. 204768462715467  
3. 090453951756806E-002  
0. 385060011311314  
-0. 276674219061516  
-0. 615945412530799  
0. 144213971999327  
-1. 19470994782362  
-0. 691908737390030  
5. 530232696408840E-002  
-0. 278563545960423  
-0. 133114763527057  
0. 240528011898237  
1. 43552601383115  
-0. 655905014795225  
0. 255235747836375  
7. 764541013562188E-003  
6. 278782359227442E-003  
-9. 304629863619313E-002  
-0. 282812236499093  
2. 565230548231891E-002  
-0. 225261910061249  
1. 752289780334077E-003  
8. 906140175704869E-002  
-0. 195063581032841  
0. 606517613481079  
3. 635636690689917E-002  
-0. 897573492089542  
-0. 631836124656566  
0. 431196859210980  
0. 332096304092043  
1. 56079209672412  
4. 046825565080808E-003

0. 457943884156752  
-1. 28459510453547  
0. 241396820123383  
-0. 936612365263468  
-0. 593128793918931  
0. 203219923144726  
0. 598561068239618  
1. 67289081404650  
5. 006040875980727E-002  
-0. 491610732479447  
1. 29487243056955  
-1. 02829575364621  
-0. 955904858488735  
-3. 199082507305830E-002  
2. 74259855276983  
-3. 46311307506968  
0. 182270293621903  
-3. 46862078394938  
2. 89245916094426  
6. 012598101363728E-002  
2. 25881268706066  
-1. 72133997648049  
0. 980149803408527  
-2. 139519336106192E-002  
-0. 908321884027604  
0. 297463077355985  
0. 270332756830835  
2. 00862978227005  
-0. 556745155484016  
-0. 564695802590042  
1. 89349556744471  
-1. 05060690013968  
-0. 927469226743429  
0. 144876595524126  
-1. 56389539239835  
-2. 32929112842159  
1. 89582984094441  
-2. 97599183558722  
1. 20982534812494  
-0. 319607626898665  
6. 44978745131857  
-0. 553498202527558  
-9. 774674998987483E-002  
3. 47770451668193  
-0. 722004452494044  
-0. 241383721409085

-3. 23497733024909  
1. 20244182102479  
0. 620429955545249  
-0. 178716400292003  
0. 114193068285538  
0. 517881183206305  
-1. 83381549844286  
-0. 637047243233987  
-0. 463406094331286  
-0. 163838737692863  
-0. 298608980587725  
-0. 167111733520653  
-0. 682236736236002  
-0. 596645562047445  
0. 953311749204818  
-9. 987288516227537E-002  
-0. 395559748648056  
7. 440265308910929E-002  
0. 371714522911123  
0. 591087708061075  
-0. 132705146838371  
-1. 384955098254688E-002  
0. 264276098956588  
-0. 130297604039673  
0. 281912945495812  
-0. 210006718937174  
0. 268963786746040  
-6. 360229821295446E-002  
0. 596716631861926  
-0. 886285306246682  
-0. 274576098314459  
0. 228406806207308  
0. 611355660113230  
1. 79120852803400  
-0. 380099666687428  
-0. 230236084470698  
0. 578735914656499  
-0. 784117346174339  
-0. 171946395345147  
-0. 742474825695504  
0. 753159505714214  
0. 608550477982945  
0. 127013156542741  
-3. 716428199751066E-002  
8. 240308088107343E-003  
-0. 257317388792469

-1. 46852602525632  
-0. 428390503135040  
0. 285903828149648  
1. 10739759514557  
-0. 125435865628720  
-0. 279134877014267  
-1. 68766563319644  
-1. 30102044292660  
0. 714396144592742  
-0. 528847701545864  
-0. 267550417504285  
0. 521544042752392  
0. 835038260325475  
0. 940047725851340  
-1. 04177167840478  
9. 230371589068240E-002  
-0. 208914139730164  
7. 624562761593308E-002  
0. 211357150649117  
-0. 455176458502167  
1. 10018886265171  
0. 552287291503466  
0. 817920629185538  
0. 746032975333181  
0. 224374259561872  
1. 333203016869745E-002  
7. 063442343191673E-002  
0. 920321474883359  
-1. 10225170275372  
-0. 274042063434787  
-0. 332281053272750  
-0. 407782390451994  
-0. 103448516154833  
-0. 249680571131047  
0. 525356196903788  
0. 317709850626234  
0. 186688901246164  
-9. 468264750015404E-002  
8. 632242823434383E-002  
-0. 349837204413793  
-0. 193883452415419  
0. 174850137444747  
-1. 38363273135993  
2. 46832568659294  
-2. 330706482112832E-002  
1. 41403533499149



-1. 87795454396949  
-0. 147189382862951  
-1. 99712152000530  
0. 845569231401118  
-0. 810716872470203  
7. 069928245378736E-002  
0. 434100602150574  
-0. 235338438780210  
0. 417022501454261  
-1. 22215663453096  
0. 752567615158194  
0. 508645999462403  
-1. 79686428767194  
0. 851418916437788  
0. 143337980274024  
1. 667527562134950E-002  
-0. 449090705975450  
0. 792126631868422  
1. 85075177159500  
0. 454868260199890  
-0. 77764420510600  
-1. 06673807513233  
-0. 268001041438252  
0. 207694379591095  
0. 173621172864607  
-2. 253742937658078E-002  
0. 315315426374755  
0. 276505038363991  
-0. 281189299885239  
-4. 671964065771674E-002  
-1. 664345118147333E-002  
-8. 728285206444659E-003  
-0. 298270977971494  
-0. 199609501159409  
7. 763495652643540E-002  
0. 124171566598829  
1. 47313361164903  
1. 05333068617663  
9. 218079172468488E-002  
-0. 369520064799211  
-0. 594053695531891  
-4. 476618597958322E-002  
-1. 17065276846436  
-0. 402530276746164  
4. 322277555556762E-002  
0. 246631681937075

0. 329543999950036  
3. 141578112863515E-002  
-0. 120018784566765  
-0. 359464163786691  
-6. 997139611208041E-002  
0. 158185611119599  
-0. 528891751053289  
0. 111977641094063  
0. 798049611760928  
-3. 038203798729735E-003  
0. 774112249874065  
-1. 23502149356221  
-3. 321387750770653E-002  
-1. 33621644137350  
1. 11943986371485  
-0. 503345922577570  
0. 322087397726483  
-0. 318593918020105  
-8. 840562595830258E-002  
0. 867763124776712  
-0. 333490184057299  
0. 230006724511320  
-0. 413216313326120  
0. 188997601281018  
-0. 156138643975389  
-0. 301521059142827  
-0. 127150941118663  
0. 362772096414025  
0. 192657706212678  
-1. 020499337091052E-003  
1. 77931838538951  
-1. 44604379885939  
0. 698790709168651  
-1. 27461525279125  
0. 310477120829659  
-1. 00159719255598  
1. 06791404623570  
-0. 784347649490830  
0. 534094624669154  
-0. 561410657994996  
-0. 188300099850079  
0. 282225322582968  
0. 569570550292209  
0. 843087813689756  
0. 161535605527688  
-0. 262334216806063

-0. 416825889716050  
0. 658306645464453  
-0. 662933403654813  
-0. 399628085863999

0. 519806843159630  
0. 151875450931433  
3. 21575935000726  
0. 918192107511310  
0. 818561966698925  
1. 35105657935701  
0. 507007442730314  
1. 17214606255839  
0. 611553564867097  
1. 93916694035680  
-2. 100470023640723E-002  
0. 974157319013953  
2. 804379626452238E-002  
0. 909946214936470  
1. 00296779929984  
-1. 28314217609659  
1. 58801787602315  
0. 997345869361215  
1. 39821206511231  
1. 79935688486847  
1. 87331450102291  
-0. 552974944362132  
0. 558582212531958  
0. 274548344926652  
-0. 732611254233061  
-2. 03237281162784  
-1. 17084459198752  
-1. 36595838490240  
-0. 443272708024940  
0. 528011717920971

2. 68700458112777  
1. 17778436445120  
-0. 878944534236078  
-0. 694642520108991  
2. 07086339141470  
1. 05616484460166  
-2. 71157197743839  
0. 123279699725506  
0. 739510346290718  
0. 192853962741090

0. 777475207100269  
-2. 69270450761596  
0. 437626681438407  
-1. 47649674067566  
-0. 419490900487415  
2. 30455509683940  
-9. 366502960231303E-002  
-0. 108717426444739  
2. 06417624523868  
-0. 133841503276943  
0. 569676178225687  
-0. 685301879863161  
-2. 29558796838564  
-0. 335789069366084  
-1. 71279559345967  
-0. 400134724318108  
-0. 522738714067690  
-0. 177929936530238  
1. 45519357312711  
-0. 108711047075458  
0. 940024090532810  
1. 54217581020336  
0. 657856257814032  
0. 520890548623837  
-1. 72866257449222  
0. 851478814950965  
-2. 80296890667165  
1. 05078901245511  
0. 514882175736790  
1. 72197220166914  
-1. 63318782405238  
1. 72589091346679  
2. 912607601178384E-002  
1. 87958593674804  
1. 65434479682555  
0. 751550566703760  
-0. 826800578147730  
-2. 72713264351049  
1. 86116265253128  
-1. 36103383044093  
0. 614992530281114  
0. 316997381983896  
-1. 73359523243698  
1. 91583174792387  
0. 328291781101111  
-3. 43051142657969

1. 04574184103454  
-5. 696997153997779E-002  
5. 705361815556657E-002  
-1. 86409243441906  
-6. 021426728342290E-002  
-0. 865685418466155  
-1. 743327050770919E-002  
-0. 124425089976492  
1. 26847646982486  
5. 377211278946147E-002  
0. 799971024570280  
-5. 586710376850452E-002  
1. 03135445490315  
-1. 10398325914205  
0. 888743513265495  
-1. 81526011295664  
-0. 269776122074298  
-0. 239396451710596  
-2. 528254652589145E-002  
0. 693867282575766  
8. 866422411703104E-002  
1. 40301422155138  
0. 323688635084244  
-7. 603234246551753E-002  
0. 236981663616526  
0. 118920307287894  
1. 74902056814207  
-0. 133340006521404  
0. 608362281251669  
1. 78744151287680  
0. 523375863425124  
0. 547190652174267  
0. 275689942539178  
0. 522015602128155  
-3. 19157597701690  
0. 175370806428208  
-1. 35565709535947  
0. 161195920421302  
1. 35136382330998  
-1. 22185233500340  
0. 750009395746061  
-0. 578223557699257  
0. 802780280015845  
0. 455115161191590  
0. 791411978027164  
0. 273934830312066

-1. 02420780504882  
2. 40914800769249  
-2. 29540176636090  
1. 27103851068231  
3. 459240997024212E-002  
0. 912917763412780  
0. 723201271768494  
0. 267432641952166  
1. 11253255076731  
0. 857848050513349  
2. 19023686108389  
-1. 39959803175172  
1. 05232929429101  
0. 712362330881954  
-1. 99480309702282  
-1. 03793750754109  
0. 307947752257468  
-3. 06536911875277  
-0. 765283238049280  
5. 923892919989057E-002  
0. 254027754691306  
1. 99567471543695  
-1. 56358549824656  
1. 53142329563130  
0. 529442750993246  
-0. 739411742624222  
1. 73666855422794  
-0. 325660789579676  
0. 537771103967264  
-3. 95060914394893  
0. 526008552877617  
-2. 77996133375097  
-0. 969742768908618  
0. 166460797804014  
-0. 375944364333836  
1. 45962734536777  
-1. 60706112744014  
0. 515294811294597  
0. 602591111981699  
1. 28106254984743  
1. 29693399684466  
1. 87564513198160  
-1. 94934660309396  
1. 21948489409562  
-9. 879982303520991E-002  
-1. 80816916400264

-0. 946036037963695  
0. 892998623804657  
1. 26853090858595  
0. 781635246800057  
-0. 505992902527007  
-0. 401265181157148  
0. 214027721488517  
0. 635969831971699  
2. 26449591789487  
1. 10451482684307  
2. 56387946768375  
0. 912960406709258  
0. 407771351708966  
-2. 56236039710806  
-0. 127571601464193  
-0. 805946320388750  
1. 29652816345478  
1. 43511740177936  
1. 14033668118269  
0. 719080803389015  
-2. 63244441507096  
0. 294319790430895  
0. 567804253856484  
-5. 018914369832896E-002  
3. 20219307234494  
1. 05294506566829  
0. 523015340497476  
0. 854191794149463  
2. 14772633081435  
-0. 748692342515625  
1. 74283489483175  
-1. 22506644777768  
-0. 241579281646342  
-2. 34476393575649  
-0. 353723018140721  
0. 927677328814780  
-1. 30997178942151  
1. 65569200988040  
1. 72396906175929  
-1. 03468585703184  
-2. 10737621541709  
-0. 963584313686916  
-0. 423652535777800  
-1. 22701808669235  
0. 758460746951968  
-2. 27623108664057

1. 74392948823360  
2. 19894799858531  
-0. 180880854626293  
-0. 301110088264767  
0. 671854846968917  
0. 458624824118510  
1. 01690056317768  
0. 945419099077571  
1. 08992129949999  
-0. 722849778862031  
-2. 87216419005125  
-0. 942437157095127  
0. 390515107494416  
-1. 83883317630384  
-1. 84810769991109  
1. 22492206566845  
-0. 897310697298977  
1. 03377875610638  
-1. 82508239404575  
-0. 130297062717700  
-0. 947745007203953  
-1. 51681436663789  
-0. 781202762090938  
0. 818710803937343  
1. 19243454891973  
0. 287434496488051  
1. 38349601106060  
0. 954804161217587  
-0. 775188330281973  
-6. 460814768684488E-002  
0. 924161313815355  
-0. 698783296507907  
0. 624170945293484  
-0. 297875541697553  
-0. 392149803891834  
4. 484215863270280E-002  
-0. 313231455232183  
0. 249467022145144  
-1. 47463067185834  
-0. 310058407453757  
-0. 554728836712958  
-1. 18352881430587  
-2. 52683505835310  
0. 398754621785991  
-1. 38610770403008  
0. 335728266133333



0. 709479459533509  
1. 41010169449648  
2. 36440070573193  
2. 20762037105878  
2. 97593937751215  
3. 08435780870761  
0. 158622280534496  
-1. 69543239126077  
-0. 796271476633373  
0. 181606383761960  
-1. 31686693404603  
0. 416180103349276  
0. 304434919473491  
-1. 02424478878544  
-3. 11745562208058  
2. 30948324120421  
-0. 201329985648311  
-0. 698184549708639  
-0. 582952848290931  
1. 55985710602258  
0. 747560479183327  
2. 33460478316457  
-1. 12761576373970  
0. 157649116821974  
-1. 16116016694870  
0. 558006527025726  
0. 937793940859464  
-1. 59247604291650  
1. 64703936862569  
0. 288043905195477  
-0. 241340978931497  
0. 330689089482332  
1. 64419357315169  
-0. 200349351180499  
7. 002380176581592E-003  
2. 62802086752214  
-1. 57620411128312  
-0. 894210143722823  
1. 70883631928834  
-0. 385422701755483  
1. 04687334381904  
-5. 94450454015931  
1. 31135900951078  
-0. 687168660595360  
0. 311805656492460  
-0. 556296047252935

0. 763956039795520  
0. 671888998411952  
7. 321457223256654E-002  
-1. 53609072231770  
1. 32496442156271  
-0. 128250977658040  
3. 41530740396361  
0. 365182757037475  
-3. 27277921887697  
1. 08968435932349  
-0. 397195746033036  
1. 03158905916398  
0. 151008611095684  
0. 327959620532124  
0. 663871168918731  
0. 614803992056497  
1. 23258236990614  
0. 228934640845254  
-0. 544072941877098  
-1. 04184181793560  
-0. 223120608680954  
1. 43393494409908  
-9. 095943409386144E-004  
2. 07827740480994  
-1. 77768961167067  
2. 12802599239073  
0. 316165924712127  
0. 190910023910592  
1. 10184009928426  
-0. 156317161257236  
-0. 541879529454913  
-0. 499683091247322  
-0. 473241106344380  
0. 376483738177836  
-4. 509512495001337E-002  
-1. 939402647830929E-002  
-1. 58745521970594  
1. 40084152214917  
-0. 196111572171299  
-0. 748432924879969  
1. 01995700415250  
-1. 18942578165637  
-0. 740919827422338  
-1. 97889572536262  
0. 891922459121426  
4. 46271982225785

1. 08885264966882  
-0. 316735468902952  
1. 37157158869620  
1. 48562108939473  
-4. 55244751287619  
-0. 197752038577998  
-0. 854985648948865  
1. 42264655244832  
-0. 709293913925570  
-0. 120934156274314  
0. 887028050967928  
-5. 949681644886113E-002  
-0. 939614117096630  
-0. 121090774119412  
6. 382955569552129E-002  
-5. 32795754038317  
0. 220953853040748  
0. 275405746644148  
0. 133290052242520  
1. 06739457815323  
-1. 55705035850550  
6. 454984899525382E-002  
-0. 466457611632047  
-0. 431463099209386  
-0. 715856667747689  
0. 834915508615556  
3. 15883073520280  
-9. 801904155720553E-003  
-0. 675487021751933  
1. 76768896972592  
0. 892087902615783  
0. 485679853209582  
-1. 14353561220618  
0. 415726951857427  
0. 483986273994822  
-1. 12921955811587  
-0. 698138318126494  
-0. 624765951230858  
-0. 739780130180772  
-0. 447476494043394  
0. 683011485008146  
-0. 157643747679847  
0. 523980503263814  
1. 99463944552936  
-0. 349092995670669  
-0. 722379068664401

1. 86447503480420  
0. 511685530153264  
-1. 41320627599312  
-1. 10877361078767  
-0. 897152369245565  
-0. 840714308621701  
-2. 28063925031376  
-0. 220393987984785  
-0. 233354916018788  
-0. 370210253705115  
0. 257464027166054  
0. 583338193082642  
-4. 089039915411963E-002  
0. 578815643757999  
0. 934129472069317  
-1. 02781554925426  
0. 529280507898115  
-0. 468216596044017  
-0. 406747354096116  
0. 813454065212650  
-2. 01739764535809  
0. 826645278863137  
-1. 18829139877319  
-0. 938316504680431  
-2. 407718010661429E-002  
-6. 486062968590686E-002  
-0. 137756080574376  
-0. 444468738196092  
-0. 954794977381824  
-2. 04872566864128  
1. 53258627890266  
0. 323976481344195  
-0. 160227324329034  
-0. 351672201795420  
1. 34196217948804  
0. 269643106688018  
0. 561076596746102  
-3. 293210003429201E-002  
0. 924469958323471  
0. 156851974288518  
0. 747121165728682  
0. 395720038737485  
-0. 397149349882729  
-1. 06268878968809  
0. 513249702121818  
-1. 307749783683178E-002

1. 44170396612585  
-0. 449411517279088  
-8. 404055235440758E-002  
0. 307772501921288  
-1. 58315252883334  
0. 778969618023453  
-0. 891453604104881  
1. 27676454159836  
-0. 412064051571650  
0. 592921199722055  
-2. 20348398139372  
0. 765372543807051  
-0. 680372084204731  
2. 13442822364858  
-0. 142710357620880  
-0. 890944618549340  
0. 913888349538295  
0. 881330781849879  
-0. 802055413471856  
0. 134356405669954  
1. 74949049439130  
-0. 121106720944023  
-0. 558646895582017  
-0. 828884325732375  
0. 243574383506580  
-1. 52065388558829  
1. 43145514789396  
-0. 455171872587603  
-2. 19289250220652  
-2. 83723232367653  
2. 97287514466829  
-3. 06292336986855  
-1. 82383494974696  
2. 02080876772640  
0. 212714930719589  
0. 691350401748269  
0. 960463031114875  
0. 663632274407197  
0. 334084663680492  
2. 38781799076605  
-0. 631067103651135  
-2. 174873375941695E-002  
-0. 294720662894804  
-1. 771254904199936E-002  
-1. 51078253274288  
0. 692108351650545

0. 509789547986040  
-0. 281624518855024  
1. 77961325024464  
0. 593971118473246  
4. 77519941661686  
1. 88805755429265  
-1. 85249892628527  
1. 24252230187862  
1. 83012600115146  
0. 391881920784943  
0. 314405361235545  
1. 15521519195316  
-0. 320991277326182  
0. 499421290482624  
9. 639667694283655E-002  
0. 961949986760458  
-0. 653953188854573  
0. 101677905831718  
0. 173860370178756  
1. 23064963312321  
-1. 23006676653382  
-0. 272305733136788  
-0. 861134346278584  
-0. 377699588349175  
-0. 641428071403159  
1. 94480510528405  
-2. 358520780421441E-002  
-1. 45229226642445  
1. 30455025976303  
2. 72809781275313  
-1. 12992478822897  
1. 00749188465275  
-1. 36728782473052  
0. 541262701988296  
-0. 218091075296658  
1. 51838072996344  
3. 20193850973623  
0. 380626704147806  
1. 25113994448942  
0. 565372277966897  
-1. 95784766297426  
0. 201090939739163  
1. 62275006394670  
0. 608578781999646  
0. 171651090473331  
-2. 16236499790561

-2. 79823674445831  
-0. 235678035987820  
-2. 45271216818841  
1. 57239241261413  
-0. 545735875900641  
0. 496109047273985  
-1. 13951706490606  
-1. 39764074833383  
8. 209411369416884E-002  
-1. 50484309096951  
-0. 380258824347056  
-1. 18430697520805  
0. 615303402626955  
-3. 15397551531387  
-0. 205151926742267  
0. 948736630755431  
-0. 288094970263166  
-1. 05659418640354  
2. 32016512141172  
-3. 01243052798471  
-2. 87185561954201  
0. 886398750228937  
-0. 687976084053374  
0. 136700997311753  
-2. 29004987306184  
-1. 24668613730030  
0. 403871338984139  
0. 844844475988723  
-1. 37223181566721  
-0. 176986716741596  
-0. 833825787607511  
1. 38000303062742  
-1. 27526007989293  
0. 681089220563950  
-0. 722673802646609  
0. 769114005957998  
0. 517061659901699  
-0. 536928639678245  
9. 992683524257467E-002  
-1. 33177458111277  
-0. 297087398213135  
0. 579259541287971  
-1. 54507673577363  
-8. 122968201816325E-002  
-2. 24419578380848  
0. 690009226591193

-2. 08119179232040  
-0. 902156001747119  
-2. 48446729647290  
1. 03911519492531  
2. 49029539507142  
1. 06490217913299  
-0. 543203248921113  
4. 98633915712930  
1. 276743944204584E-002  
1. 27509133996578  
0. 423803660592172  
2. 44422590063170  
-1. 14711661912319  
2. 43663811536692  
0. 249522478133132  
-0. 756320070678095  
-3. 35842178107882  
7. 007983846816761E-002  
-1. 37480698469268  
-0. 116805704229138  
0. 470354207216865  
-2. 57112382581408  
3. 055429787058472E-002  
0. 396914943823715  
-0. 363733714385456  
-0. 481723224297140  
0. 234155458188659  
0. 724691157357489  
-0. 221460849642400  
1. 14366803690921  
-1. 36028176992387  
0. 647116264503233  
-3. 80956072885733  
-0. 605487025493068  
1. 36145719472117  
-1. 91341818321426  
-1. 01895443882713  
0. 720543013082585  
-0. 498803127363810  
-0. 165166992210169  
1. 32059685104624  
1. 73095556565308  
6. 086041662891388E-002  
-2. 42115574610137  
-2. 32810689082872  
1. 42409439831032



3. 20028030294407  
-6. 856260689377594E-002  
0. 203355424849493  
3. 01218793713413  
2. 29349971163567  
0. 487909766709500  
-0. 837602528465956  
-2. 44927779324116  
9. 023099778750751E-002  
-1. 05955706566184  
-1. 39522943444153  
2. 597849814979254E-002  
-2. 10514446051960  
1. 50475090374423  
-1. 47238171718091  
1. 75846006370548  
1. 74217328182701  
0. 536621407704096  
-1. 02619255310353  
1. 74949230568013  
-1. 54875144025069  
-0. 424413056293011  
0. 385766253019062  
0. 948549417745946  
2. 48751823832481  
1. 27864602382044  
-0. 610342191054197  
0. 350798007012328  
0. 648342230489697  
-0. 777956703982387  
-3. 18657663518384  
0. 524546108323492  
-1. 54390076127524  
1. 61135918063927  
1. 59376185706752  
-1. 96419867328831  
0. 254374166437802  
0. 311015510560191  
-0. 311609758285477  
-0. 555095285027099  
1. 87754519304418  
-1. 11459272870107  
-0. 895353005193084  
0. 841129721559025  
-1. 83075159815864  
-0. 821427595575869

-3. 44019661634444  
-1. 07611770542846  
2. 32438345417651  
-0. 482273268538991  
-0. 789336927851447  
1. 51027697212783  
-2. 37641637512691  
-2. 21854928848659  
-2. 66685254408009  
1. 30019733422567  
-3. 69357164155888  
-0. 266106337154754  
5. 47571468510913  
-1. 85966230899526  
2. 78719901284090  
-0. 281168424435985  
0. 374422345291109  
0. 175474057599913  
0. 175073020579578  
1. 42792948974903  
0. 358173368603302  
-1. 47454014942111  
-6. 829284947088372E-002  
1. 98905638967687  
0. 661514768406710  
-1. 67722645661098  
-0. 868089286881257  
-2. 91780124879532  
0. 557907885387233  
0. 359052725018916  
-2. 21727134915336  
-0. 457535089469145  
0. 340491379361485  
-1. 15083486699744  
-0. 922724086343151  
-0. 471670254141243  
0. 429432696463570  
-1. 00759906244259  
1. 10499439180191  
-1. 16403845247294  
1. 39672088290811  
-0. 166933301813626  
1. 63657319852082  
0. 434641828677295  
-1. 92479442493658  
-1. 24743028256296

-0. 623871939229153  
-0. 425150267746070  
  2. 17331870817746  
-1. 58544655793760  
-0. 784944140786261  
-1. 28543075059759  
  0. 515188136915293  
  1. 43537134640881  
-1. 65576477847805  
  0. 643763944150610  
-0. 386954349109499  
-0. 135458175497529  
  0. 629716326503866  
-1. 11133874078847  
-2. 42765223393652  
  2. 50690686429041  
  1. 06839138348141  
  1. 86519367769132  
-3. 426775125409641E-004  
  1. 03094650135260  
-0. 495706930310899  
  1. 09546631766752  
-0. 868041849042451  
  1. 11297045857328  
-0. 179160675445729  
-9. 312361197335892E-002  
-1. 44334036072411  
-0. 294562099690200  
  1. 06024571027093  
-9. 096750455149101E-003  
-0. 373040096063589  
-1. 25913049944017  
  0. 791769673627503  
  0. 415427634760752  
  0. 190360782924738  
-1. 11855291024036  
-0. 162403824036752  
-1. 36711430920132  
  1. 35475649047105  
-2. 79703758352008  
-1. 51548629278543  
  0. 308316658897232  
  0. 524207253763810  
-0. 110851186523558  
-1. 49681970288458  
-1. 04503156400427

0. 420117971785480  
0. 520400680735356  
-6. 646467964308894E-002  
0. 185286476069156  
0. 645353007406597  
1. 28832028399847  
0. 447871567425711  
1. 59031267799342  
0. 844646032401485  
-1. 98779958637290  
-2. 80230817851397  
0. 254171253387797  
0. 189269467458917  
0. 686314502006715  
0. 426571806494616  
-1. 67993413436841  
1. 16619695023331  
0. 792466866093971  
0. 714801242245116  
-1. 71322864338026  
-0. 377149502547029  
-3. 41078375751348  
0. 947378807699200  
0. 107296150905440  
-1. 38474969584846  
1. 17655330772907  
0. 900391236296998  
0. 138569734671873  
0. 858385065187960  
1. 76157458819478  
-1. 11935116589391  
2. 79872349032282  
2. 25657147777960  
0. 880368432142835  
-1. 10598889006016  
-1. 67615900039546  
-0. 334798286031799  
0. 387653163455013  
1. 13639656317998  
-2. 496077614802321E-004  
1. 05796054537944  
-1. 53834347280221  
-2. 04868271676955  
1. 18901192300618  
-0. 769469744180624  
0. 313280484134409

-1.56461019865522  
0.953271893097128  
-1.12126488145442  
-0.857584335553542  
-0.938009642365898  
1.83825764389022  
-0.700689820047988  
-0.699034871101402  
-0.466500271695301  
9.394510919348117E-002  
2.14792576182768  
-0.797226429711052  
1.10757415834057  
-0.672803720385183  
-0.837466277978167  
-1.61657801483994  
-0.140078067085876  
0.548073859691112  
-1.17072714125547  
0.157845898108242  
-0.228451750582559  
1.74095572964943  
0.696145955258836  
-0.200020096891826  
0.218069459490393  
-1.08536431581471  
0.269238108813333  
0.531108959837553  
0.287982694100661  
-0.452100148268612  
-7.484723625989363E-002  
0.844548958548426  
-1.16166887025742  
1.46607335987380  
-0.459510876517787  
1.17362794597736  
-1.08113372045654  
1.28038332827356  
0.901600159137630  
1.15697959759186  
1.42185429028076  
-2.477539520384312E-003  
0.498337934628545  
1.25100257954791  
-1.81610103114199  
-1.21336479868666

0. 108881629544295  
-0. 604801566437911  
0. 375854652660403  
-1. 63271151356651  
-0. 565503188271907  
-0. 190127591824785  
1. 15081093460382  
0. 574118156369572  
0. 663374261984863  
-0. 309963941268766  
0. 944948209419612  
-1. 03651184834046  
0. 102988539769178  
-1. 63715411957135  
0. 810418983568551  
-0. 127936765138781  
-0. 542254478105960  
-7. 748826982984751E-002  
4. 644322431450670E-002  
1. 93613205230322  
0. 331999534125522  
-0. 529085611354135  
-0. 299691921184547  
-0. 519827493593590  
0. 939200633045722  
0. 163277119454114  
-0. 340636680624539  
0. 492629476604680  
0. 828460208878217  
-3. 310649319832129E-002  
-0. 255693297547528  
-0. 211425888657386  
-0. 193984981052211  
0. 258796454974958  
-0. 599563547755054  
0. 161547696197443  
-0. 518399887908643  
-0. 318762345921407  
-0. 639131302227067  
-0. 766808888180550  
0. 692800239287465  
-1. 17020955743711  
0. 798145615940857  
-0. 696932668688414  
-0. 509316607558817  
-0. 339953618915187

0. 114850857970201  
0. 681144984554310  
-0. 859999862625164  
0. 275909372707233  
-0. 857702591713676  
0. 228900693883722  
1. 248428084064098E-002  
0. 853329117946095  
-0. 761759454210998  
-0. 473519509764845  
-0. 442451572075532  
-0. 632640074981535  
0. 434879291918747  
1. 08117262521485  
-0. 180942138428526  
0. 567117100918276  
-1. 04313169060841  
-0. 524836913895086  
0. 133770896295029  
0. 290257938956530  
1. 84342558233849  
-1. 01029081669004  
-1. 59748696309185  
-0. 889039214930190  
0. 521812066189263  
0. 664958241340823  
1. 83420128280616  
0. 674057812591076  
0. 653945909372042  
0. 533431653259603  
-1. 04138960306159  
0. 344970765941085  
0. 476436756850665  
-0. 539490386571113  
2. 229108374806053E-002  
-0. 651917357488034  
-0. 588070978763188  
-0. 461139272928613  
0. 879189780608883  
0. 645432522055880  
0. 989902614160125  
-0. 104560769365139  
-0. 230891780102100  
-0. 502976756634723  
1. 87649828922325  
-0. 296781014484609

-0. 913198033326781  
-0. 897769627787772  
-1. 95486814292664  
9. 226896090207173E-002  
0. 677393297277103  
2. 40734157022696  
0. 327914635935657  
-0. 736401477421494  
-0. 693648957380839  
-0. 691688111294127  
-2. 66384337810313  
0. 666886699670653  
1. 79728164427518  
2. 22562471385808  
1. 12426731738407  
0. 404405107047660  
-0. 573515289181874  
2. 53700350293946  
1. 03287002489525  
-0. 834105522616507  
0. 724924201373865  
0. 138700918523530  
0. 873104045023393  
1. 69373869925708  
-2. 00643555673496  
0. 946395060322436  
2. 18017895928412  
1. 89851549836950  
-1. 02408602990402  
0. 276656495325352  
0. 225264782361320  
1. 08375481307319  
-0. 653829365756122  
-0. 958370959191286  
1. 67239605739862  
-0. 114947006851581  
0. 881199562975443  
-0. 635082550542265  
1. 86790609998323  
-0. 917058210652669  
-1. 27948858142490  
1. 95790941962466  
0. 412858894205414  
-8. 561780266633493E-003  
0. 140920988317486  
0. 498616694649440



-1. 59279910414596  
-2. 422706068674554E-002  
-1. 26728800459022  
0. 357427569932137  
1. 25785694346378  
-0. 261394237601062  
-1. 93053812478467  
1. 58137068022691  
-5. 104456268212197E-002  
-1. 20859419841915  
-1. 41849879908274  
1. 06227402470488  
0. 345182931509036  
-0. 564569349058198  
6. 218256835174968E-002  
-1. 21961703219464  
1. 13304193881207  
1. 04813452336285  
0. 190645619308226  
2. 27539650979803  
0. 640030048414276  
-0. 396735062690896  
-7. 797601573691316E-003  
-1. 65560372126622  
0. 479623973323298  
1. 31010252414834  
1. 97610672438031  
-0. 914768160172833  
0. 584405328558006  
1. 32318927155901  
0. 787102119668699  
-0. 377702485698433  
0. 288717692742964  
-0. 667441153413046  
0. 426666735160033  
-0. 305535654106742  
-0. 167937203093293  
-0. 340811776675152  
-2. 23905158251088  
-0. 396530662167771  
1. 07966553046889  
0. 805765320473711  
-0. 544810220824243  
1. 00870529165255  
0. 963645984370218  
1. 44210686552875

-1. 17341682747062  
-0. 522352001233939  
-1. 44167698235365  
-2. 01719265866028  
-0. 953673284117643  
-1. 76954339707615  
-1. 68071965736953  
0. 157605203186625  
-1. 09993551508334  
-1. 55313736246323  
0. 447623928011457  
3. 56231597499877  
0. 534814894288784  
-1. 16663126522874  
-1. 89694947226534  
0. 665770734329152  
1. 22362459530011  
1. 87160083366203  
-0. 306460774062284  
0. 742173139252626  
1. 67877906441581  
-6. 221341501499226E-002  
-0. 678425310954906  
1. 41775584037794  
-2. 39789499350996  
2. 30305857017404  
-1. 94051743830392  
-1. 62950127954030  
0. 509943678792319  
-0. 675564152191002  
-0. 720744084769962  
-0. 554603667813444  
-0. 791671040244752  
1. 24667356433271  
1. 81336308732063  
0. 241468140089698  
1. 62791908918951  
-0. 456201277981745  
-0. 181250296749606  
0. 851910433890449  
-0. 396733789324085  
0. 504388119090881  
0. 719944678704366  
0. 621592049801890  
0. 591134911043749  
0. 555621310442805

-0. 619759275642468  
9. 999106639406460E-002  
-0. 117074535123007  
-1. 52763109509627  
-1. 39657944760853  
8. 081465756761413E-002  
-0. 609377263953307  
-0. 303463309577856  
1. 24982084911439  
0. 325029078075661  
-0. 292121426199286  
-0. 773503500630445  
-0. 980997626396511  
3. 51847305335779  
0. 477679836336702  
5. 085380125655270E-002  
-0. 216471383154976  
-0. 873260826418005  
-1. 66819117389945  
0. 523805114306169  
-2. 31693018739303  
1. 16784804632757  
0. 467644923442671  
0. 861122353675350  
-0. 524742263164321  
-1. 05897424408032  
0. 898960065935644  
-3. 664206250342918E-002  
-1. 02086929764081  
-4. 12469934920523  
1. 87068815186613  
-1. 04886443448474  
0. 462519949865931  
1. 80353085763484  
-0. 201363067775350  
-1. 02128351887699  
0. 117540695962593  
-1. 95931121808451  
0. 228025186700072  
0. 981386518976192  
0. 972555882859314  
1. 82524529342641  
-1. 55564226542531  
-5. 791101232178385E-002  
1. 07199808693456  
0. 130454788194205

0. 446061142678604  
1. 87130423043791  
0. 717197500845287  
-0. 556526642968284  
0. 334450650517382  
-0. 103550621063292  
-0. 863164208381294  
0. 304665157522588  
0. 627473766610155  
-0. 319182658393757  
0. 905581367252768  
-0. 258703092943119  
0. 194400308100624  
-1. 06748013205618  
-4. 024052355025162E-002  
0. 670160597039081  
-0. 182913863643157  
1. 00490231910119  
-2. 30052120695374  
-0. 765723858488009  
-0. 290977030348827  
-1. 038964827674289E-002  
0. 732645406353476  
0. 215071662946050  
-3. 694430969574039E-002  
0. 859009534982038  
-0. 263443821043644  
-2. 30470082009448  
-1. 12096832893952  
-0. 703445602981641  
-0. 982117754363245  
-0. 663237921115738  
-1. 36533580923248  
-0. 429880257361794  
-7. 829636413494848E-002  
0. 805956054498394  
0. 116995723494240  
-1. 22865178630402  
0. 483930541647598  
2. 55528487638726  
-0. 677667447768894  
0. 785972913031799  
-0. 810930087936540  
-1. 05133065630609  
-2. 29336985511016  
3. 98312932918429

1. 16641853661344  
2. 37536574874991  
-0. 590739559491567  
1. 05498096174898  
1. 66075125054284  
1. 88457014386537  
-0. 450122275283680  
-2. 19355907635270  
-2. 17110768827176  
-0. 606159185689364  
-0. 159581082477782  
-0. 223176030428938  
0. 138280572558548  
3. 649529577239484E-003  
-0. 793345620508186  
0. 940394065595372  
-0. 514235781701608  
0. 197357475631160  
2. 00598094985590  
5. 161366875556875E-003  
0. 595955770618236  
-2. 56162367841812  
0. 143585982720760  
0. 825633378668311  
0. 321898851837913  
-0. 303704378305344  
0. 417665450108087  
0. 661878361444795  
-1. 00501834949522  
0. 193882111554302  
0. 138991633538350  
-0. 683595518208990  
2. 24829248578110  
1. 15447200420027  
-9. 983545163260081E-002  
1. 19150808170300  
-1. 65812179453322  
0. 894382427768163  
0. 440896836179336  
-1. 20467448538628  
0. 751853694578668  
-0. 503257464231331  
4. 072780979842701E-002  
-1. 71840237832561  
-3. 015049350093758E-002  
-2. 59728834802428

-0. 428118236148802  
1. 04825065296293  
2. 894914685638356E-003  
1. 65951195763475  
-0. 191085394999536  
1. 24762746522180  
-0. 428351228885552  
1. 59599971544990  
-0. 968141234793677  
0. 524118958787059  
-0. 113311801463461  
2. 08339000774245  
-0. 779056578677248  
-1. 39968102911013  
0. 885642570745774  
-1. 47283490889952  
-9. 129148024012984E-002  
-0. 419850404625796  
-0. 374546033048651  
-2. 12558004032491  
-0. 216928690518582  
-7. 079769136600113E-002  
-0. 594625647313592  
-1. 96399738638692  
-1. 30782786302999  
0. 252366161819923  
1. 77879167707972  
0. 146748436614116  
-0. 738740249618306  
2. 68192620202847  
-0. 609454865107320  
-0. 244072000346568  
-0. 512862848648110  
0. 102041293755916  
-0. 161695066883799  
1. 897061268575570E-002  
-6. 874902900791824E-002  
-0. 897636622567717  
-1. 114281735597338E-002  
0. 473318577002144  
-1. 144092706234696E-002  
-1. 836794969713156E-002  
1. 04096510342841  
-1. 72768133648649  
-0. 521176582049872  
-0. 420887132411029

-1. 35419775312901  
-5. 694899618533314E-002  
-1. 72733584842614  
-2. 59136593147715  
0. 402364503907857  
-1. 64170295079110  
-1. 09663766323444  
-1. 37935949686855  
0. 565027775164750  
-1. 64415252724760  
1. 21636809963895  
0. 743776348459378  
1. 23020658049751  
0. 869616131383392  
-1. 41944039061726  
3. 265711586712089E-002  
-0. 773325828929569  
0. 869633633833858  
-0. 521528010866032  
-1. 62400522600741  
-0. 222919607135119  
-8. 552446195304282E-002  
-0. 805395391749124  
1. 05994920106361  
-2. 627649447587697E-002  
0. 346699624375460  
-0. 747218126425045  
1. 262221189595732E-003  
0. 375916286631659  
1. 65512560136600  
0. 775065381802122  
0. 893256254122340  
1. 03587034545588  
0. 344515932617851  
0. 767467322303976  
-0. 924918585338040  
-2. 651874644618127E-002  
-0. 115940404924364  
-2. 09631248458261  
-0. 346881665102292  
-1. 98186123139894  
0. 557547853363331  
-1. 59579355294657  
-0. 643761889741340  
2. 68339597320752  
-1. 04684545786897

1. 25491725383072  
-0. 456393319211296  
0. 587973462120444  
0. 283867195889083  
-0. 206195373884682  
-2. 156491991726229E-002  
-0. 826210495042471  
-0. 161613675571535  
-0. 888733014433509  
0. 553420292508340  
-4. 697137405845905E-002  
0. 126872946609353  
0. 226226696346506  
-0. 427400492407500  
-7. 768001617742748E-002  
0. 389730755320521  
-3. 775726075658310E-002  
-0. 188653277115384  
-1. 64763794799157  
-0. 660924129430138  
-0. 508658228360975  
-0. 319160235205105  
-0. 412713697445062  
2. 46619043783351  
-0. 992061498009827  
-0. 763785129444178  
2. 90467731365553  
-2. 17239411710412  
-2. 16440412816877  
0. 260672126340398  
0. 899715141840765  
-0. 380408628409966  
2. 46460314402342  
-0. 757820304323235  
-0. 487577027829294  
-1. 48993415679130  
-0. 132141250615132  
-7. 416201017914462E-002  
0. 530372780481460  
-2. 29397199955380  
1. 57935539758273  
-0. 222814513929476  
0. 291165863271311  
-0. 141690957243436  
1. 03803668499102  
-0. 617600674676817



1. 09553957160603  
0. 876003768359768  
-2. 81667164340304  
2. 17684992335514  
1. 27410723306464  
0. 787724692382299  
0. 771651828316877  
0. 567080604497933  
1. 148797790928419E-002  
1. 20288673369849  
0. 432943635452492  
0. 795946647042478  
0. 108720904729040  
-1. 13450659698089  
1. 18560349138188  
-0. 915852906748855  
0. 557233014304009  
-0. 387481801532909  
0. 279095035416537  
-0. 301834655661587  
0. 869226621157638  
0. 366721785952802  
0. 196408909125244  
-1. 26361203460687  
5. 156106099705789E-002  
1. 89414265879217  
0. 429374868085364  
0. 556512210893078  
0. 539983021717884  
0. 465847525071191  
1. 49445590346192  
1. 13625087919553  
-0. 905407966176536  
1. 93910223455624  
1. 24136046093961  
0. 783191223004242  
-8. 891066994256827E-003  
1. 38850285430275  
2. 63968362181509  
2. 14067225212401  
1. 10415528514268  
1. 35555728011344  
1. 00614924890935  
0. 577301261670177  
0. 563789177699512  
-0. 356235436567130

-2. 718376928668659E-002  
0. 577888237325753  
1. 39062691544457  
-4. 10416947561315  
-0. 222993695571612  
-0. 512968332932885  
0. 999733104564077  
-0. 292336583438215  
-0. 331109705158431  
-0. 689234414338553  
-0. 659014842926699  
1. 27046513376685  
-1. 62329385617553  
-5. 905821761728699E-002  
-1. 49875900769051  
0. 407884955162969  
0. 943773338213174  
-0. 985622212278061  
1. 08079555918202  
0. 421871236149577  
-0. 528508856998458  
2. 58213067782084  
0. 228376484838053  
0. 284888057483303  
-1. 21629591634993  
-0. 128925431702467  
0. 312095274732562  
0. 585236384408080  
1. 29337039370709  
-0. 946789738638794  
0. 160740428230802  
-1. 77754567120019  
-1. 47508311732314  
9. 267192189796856E-002  
1. 46179945338382  
-1. 22093331070336  
-0. 329322804009651  
-0. 785192979168009  
0. 283314466298439  
5. 866751680012443E-002  
-0. 718292103819718  
0. 470550506421326  
8. 805503908742413E-002  
-0. 157939356428967  
4. 580546652832247E-002  
-0. 418389938269087

-5. 603953873312867E-003  
-0. 827988086237516  
-0. 416995429475360  
0. 723689484688319  
-2. 44034777257899  
-0. 154150216358491  
2. 76473291232385  
-0. 745392542272593  
-2. 88060759163760  
0. 336912489499615  
-1. 63721659533610  
-0. 264582296098679  
-2. 85812282425731  
2. 55032202202822  
-1. 28646548886947  
0. 550180395903039  
-3. 04016652635502  
0. 649499741302980  
1. 29759771963514  
-1. 62038569297514  
0. 368062647037299  
-0. 421920917701300  
-1. 23785674744803  
-0. 949677339580176  
9. 722107442548455E-002  
0. 913154806130352  
-1. 80962531713439  
-0. 864567829977405  
0. 157874212350475  
-2. 13272419098020  
-1. 41804630317556  
-1. 14643222199594  
-2. 78438018323463  
-1. 05668521945319  
-1. 59448181831239  
2. 21398530295224  
0. 604302911124601  
1. 72259563140014  
-1. 30636626712550  
0. 936298462309018  
1. 14253477362322  
-6. 496048776485724E-002  
0. 953682743857298  
0. 450014431951850  
0. 566658897227942  
1. 20378383542599

-0. 599734934315750  
-2. 16360445698402  
3. 979853989423100E-004  
-2. 37949328544025  
-0. 429300423291796  
-1. 48303102345177  
1. 93763909587305  
-1. 32151288955652  
-1. 17113750196587  
2. 28411942573565  
2. 58267638804867  
1. 51770712204238  
-1. 01481864910833  
-1. 50491896171838  
-1. 86853964350630  
1. 79911939527964  
0. 155905413356334  
-1. 70571954324633  
1. 10320952542345  
0. 355026663618733  
-1. 36532927267460  
0. 449177848161624  
3. 00114787367353  
-1. 19247325428477  
-0. 348023387404673  
-1. 013730885278268E-002  
2. 75766747131703  
-1. 12225845678258  
-0. 273262069204595  
-1. 76013653103972  
0. 922017188603404  
-0. 474616098766514  
-0. 435196222265200  
1. 99601590118233  
-0. 450372880057930  
-2. 11061411015610  
1. 32899638456380  
1. 95041831123370  
-0. 416393147897751  
-0. 171519098868261  
0. 604807470148762  
1. 70369722449825  
2. 36476005258948  
0. 503802927712604  
0. 420691916828855  
3. 407241786618117E-002

3.14870929961789  
1.24816306722127  
0.269800606016683  
0.730028145440351  
-3.69270210937428  
0.243002418115303  
-0.759320404134252  
-0.208920741666062  
-3.20890418806053  
0.455004998282933  
0.443916080392082  
2.69232962043890  
1.20912013130642  
1.92061361191175  
0.944723850176414  
1.41362081125101  
2.66734812512342  
-0.804031894939934  
0.840154820548938  
-1.68698610472705  
-2.19690417281173  
1.03175321838117  
0.489429805724711  
-6.612712555815371E-002  
-0.606103281499000  
0.106038239431921  
1.74178658803456  
0.524348316341968  
-1.24139397574651  
1.73376514487651  
-1.13500767761746  
-0.206589671950618  
0.233137677062740  
0.526053042346915  
2.273120580308008E-002  
1.51418316883374  
0.138935926892887  
1.67108189755308  
1.46166761908786  
-5.794853339318116E-002  
0.733459565919844  
3.594148420046159E-002  
-0.937675714090056  
0.217285680680593  
0.126733957079015  
-0.957624595482497

0. 518193196520912  
1. 20327926918379  
-0. 602233142370414  
-0. 769709010602775  
0. 719978931375125  
-0. 298994164227556  
-1. 43066442947045  
0. 316226459919752  
-8. 071988678216536E-002  
7. 664791429010620E-002  
-0. 932121649762076  
-1. 05104041413299  
0. 726552786780835  
-0. 700102762685551  
-0. 310661839925568  
-0. 152801624607016  
0. 462762362012237  
0. 190069858234760  
-3. 21787121525244  
-0. 372495406881879  
0. 603625669562144  
-3. 75017831591070  
-1. 68716825669937  
-0. 674743038126537  
1. 15288892347900  
-0. 116345613857126  
2. 45308557617953  
1. 80697373815135  
-0. 172298335832965  
2. 71178700153260  
0. 186880695814430  
-1. 74685081265366  
0. 444879804756255  
1. 189658182416720E-002  
-0. 796713488914518  
1. 09941137326487  
1. 27227493210551  
-1. 24076530540898  
1. 37618479984644  
-0. 605911873139063  
6. 49407414049547  
2. 95745837683020  
-5. 99106703256226  
3. 37120376302677  
0. 719532323884722  
-0. 960460533597954

-1. 04490295165265  
1. 66834813935848  
0. 261325486789703  
0. 264764509313975  
0. 276229227278573  
0. 742516339735513  
-0. 254641126354275  
-0. 618993157542798  
-1. 30499659162269  
-1. 54710821697399  
0. 303690173917994  
-0. 992182561497838  
0. 522586307972944  
6. 468225360948723E-002  
-0. 614086393295372  
0. 233213060705970  
-2. 037438287137205E-003  
-1. 42348259666214  
2. 04425248895591  
-0. 527941131882527  
-0. 757245064264229  
-0. 193667404556207  
-0. 117985104344634  
-0. 372386925030288  
-0. 966524478183930  
0. 701778660729187  
-0. 813090392576983  
-0. 497025892304156  
0. 554550768646109  
1. 46233198942927  
-0. 721430868979439  
-6. 553799538420405E-002  
-1. 79329292608896  
-1. 65492867291401  
5. 938411768306025E-002  
-1. 11266168645288  
1. 15319108728675  
1. 10738935262998  
1. 18243045398458  
-0. 920819570586397  
1. 44472873495312  
1. 43465454905417  
-2. 53413909092378  
-9. 356674449410404E-002  
-0. 720071142204822  
-0. 891916068274979

0. 373559457705811  
1. 30498513049434  
-0. 191528528434317  
-1. 47285212748377  
-0. 279937936797287  
-2. 36229851242118  
-2. 19451008566293  
0. 784101195492389  
0. 224638556347061  
-0. 761406223831304  
-0. 513030788534263  
-1. 81660135600501  
-0. 722947283222444  
-1. 43926393513060  
0. 533488737291943  
1. 69576192191592  
0. 839403598724797  
-9. 952581613494944E-002  
-1. 35049258239610  
1. 73603402782378  
1. 24058558330757  
-0. 411960798147901  
0. 169700857748291  
-0. 649478848687670  
0. 580120154079120  
0. 547317700578987  
-0. 326855865080883  
-0. 539948779804213  
2. 17069756021719  
-0. 593992827030408  
0. 754059789722033  
-2. 58711835517124  
-0. 923922478503300  
2. 00575676554397  
2. 513221840264585E-002  
1. 34865239257331  
0. 595983925797605  
0. 195750056665912  
-1. 09096037421889  
-9. 221426677462524E-002  
1. 76098678672335  
-0. 912900021793966  
-0. 106537571658288  
0. 590395005141775  
-1. 31804095021144  
0. 591131926765890



-2. 04032128466605  
1. 34873277855507  
0. 143601119474116  
-1. 46712312809465  
0. 903195793321882  
-0. 609008351634344  
1. 58571853411848  
0. 136974840678546  
1. 38125890036976  
-0. 32211456554951  
-3. 699505343756043E-002  
1. 14432598755183  
-0. 927904745296135  
1. 09818772624706  
-0. 124391713158406  
1. 68733274145622  
-0. 417959089337900  
0. 210556064270948  
0. 696337135157311  
-0. 435491802259576  
1. 40719497905974  
-0. 773671671243789  
0. 445087739169703  
0. 801813550344025  
-2. 87805516696373  
-0. 518550943352611  
-0. 106640283809386  
-0. 454547907640963  
-0. 546215379616882  
-0. 732114045531182  
-0. 207363679502673  
0. 493641807481234  
-0. 173937288806542  
-0. 498533350534399  
1. 39707875250474  
7. 430264437630808E-002  
-1. 35428431021289  
-0. 600233173824507  
-0. 734177837972087  
1. 10483944399083  
-0. 238312948126484  
0. 872638205157623  
-0. 761920804556376  
-0. 520874833213722  
2. 249250282685110E-002  
0. 278454479396439

0. 180524488597337  
0. 138282276571237  
0. 747138303024383  
0. 707271391691894  
0. 247039693635695  
-5. 485201682765708E-002  
0. 255173477653161  
1. 41440957306031  
0. 573680500315301  
0. 147998705676641  
-0. 355037534543678  
0. 527102988615956  
4. 736260938869498E-002  
-0. 639397603035660  
0. 433473737567874  
0. 970860176328590  
-0. 857294060831541  
0. 181327948334419  
2. 64539396302166  
-9. 276281533892726E-002  
-0. 662324728901021  
-0. 150384858344189  
0. 554517958370649  
0. 166666852676831  
-0. 160230264320501  
-1. 01286096633728  
0. 718391223780361  
9. 395418294124921E-002  
0. 546267603745300  
2. 13326008847386  
-3. 54894012971118  
1. 96224200872773  
1. 34602174458843  
0. 549371753562586  
0. 536082863508343  
0. 485105546804485  
1. 12864125673608  
0. 596927353682880  
-0. 171928587853228  
-0. 889905334760915  
-0. 129878161833338  
6. 850964766885345E-002  
  
2. 62623727438435  
-3. 21924455968885  
1. 86555157088375

1. 40256667880790  
0. 226255198007885  
0. 946720804655782  
0. 846397587658002  
-3. 459264504458133E-002  
-0. 859975363436279  
-3. 25938827033278  
-2. 98112314339561  
3. 04233785475790  
0. 334796159528972  
1. 73557662178012  
1. 06529962850317  
3. 19494765250417  
2. 05768798856637  
2. 84967899130555  
-0. 559090065881439  
0. 238099239470152  
-2. 00927835106629  
-1. 31664332060734  
-2. 60866192636025  
2. 01436227418943  
1. 24421335708675  
1. 23016667506964  
-2. 88822255171563  
-0. 895371402633742  
0. 342258564995980  
-1. 03158139963371  
3. 77996623196520  
0. 813487892738728  
0. 249442251854583  
-1. 81336823305048  
-1. 34080271193472  
-5. 424814598360232E-002  
3. 55185671316284  
0. 853211947697813  
3. 10353500027184  
-1. 40026861637836  
-1. 15451578248044  
-1. 56249751396493  
0. 191730251551931  
1. 33188151714259  
1. 50452944706029  
-0. 785409903600026  
-0. 476752723943035  
-0. 839822330778061  
-1. 31038199570471

-1. 83008067182287  
2. 35073733469606  
-1. 60057745096259  
-0. 686242853974941  
1. 40615362558044  
0. 173819665526165  
0. 862670394733337  
-2. 67646322909801  
-1. 04141904207064  
0. 778538694744631  
-0. 822644925163234

2. 02144004616886  
3. 81244637825684  
-5. 59024611879448  
-2. 20081352587983  
-2. 14674657526738  
2. 56749680291674  
-1. 50438334452366  
2. 50404751865992  
9. 60375806736054  
-2. 28284882819943  
-3. 79253165559469  
9. 61504235274560  
-5. 32819806990983  
-5. 53874653870500  
-5. 32948302350526  
-2. 92589603734262  
1. 50548883620524  
4. 87970069401179  
-4. 06515071991958  
-10. 7978727342169  
2. 37114630576989  
3. 43525722555927  
-2. 96771693790162  
4. 26281876157869  
-6. 30084092234006  
12. 1120807706933  
-1. 98451302721829  
7. 19467649274400  
11. 3627122959024  
-0. 580720057184766  
4. 25560571179537  
1. 53252200868446  
0. 522396600744790  
3. 48490593986199

6. 67245177056386  
-8. 86124917659919  
9. 28043439541174  
-6. 54886974937741  
2. 79926633626003  
3. 62545677330894  
-4. 79617503407697  
-4. 81070619211275  
-5. 94717261545440  
6. 60258776652318  
5. 10130604319251  
-8. 55029821400406  
7. 25511526103428  
-5. 82540198976131  
-2. 56698603260512  
1. 58002317614673  
2. 96317417806260  
-6. 06658236723711  
7. 13449423717221  
5. 11798312028122  
-5. 26188164528649  
-0. 890314889479570  
-1. 48682798535427  
-3. 88062706389173  
4. 81391998414069  
-4. 46470350383147

1. 82285609643250

|                         |                         |
|-------------------------|-------------------------|
| 0. 108348250000000      | 0. 928360640000000      |
| 0. 519467660000000      | 1. 264585680000000      |
| 5. 061300000000000E-004 | 0. 917910540000000      |
| 9. 816979999999999E-003 | 0. 296058650000000      |
| 0. 118545700000000      | 0. 533686450000000      |
| 1. 300000000000000E-007 | 0. 310949800000000      |
| 5. 940463000000000E-002 | 0. 709091330000000      |
| 1. 696200000000000E-004 | 0. 486565820000000      |
| 1. 698300000000000E-004 | 0. 272111400000000      |
| 9. 625400000000000E-004 | 0. 121795150000000      |
| 2. 831653000000000E-002 | 0. 225490190000000      |
| 0. 000000000000000E+000 | 0. 133533580000000      |
| 5. 618720000000000E-003 | 0. 211165370000000      |
| 5. 600000000000000E-006 | 0. 150655750000000      |
| 2. 096000000000000E-005 | 0. 101124060000000      |
| 2. 996000000000000E-005 | 0. 146962150000000      |
| 2. 000000000000000E-008 | 9. 189258000000000E-002 |

9. 0000000000000000E-008 0. 217123540000000  
1. 0870000000000000E-005 0. 159609020000000  
1. 2783000000000000E-004 0. 216988040000000

-0. 3122160000000000 3. 999428000000000

tansig tansig  
20 - 30 - 60 - 1  
rmse= 6. 8500 meV

W015. txt

0. 224509268665597  
0. 973756580440806  
-0. 367454355042751  
0. 374886734718432  
-0. 114473974559787  
0. 332431222030952  
-0. 485098615196256  
-0. 326744071358196  
-0. 554026403449837  
-0. 495029068742443  
-0. 599841941702768  
-0. 103284128980482  
0. 473201985370149  
0. 133600036832573  
0. 240490814947832  
0. 201298340722369  
-0. 214336406915656  
-6. 026868205644095E-002  
-2. 388680727751813E-002  
0. 468622427468196  
-0. 218034243337422  
0. 405287543255221  
-0. 473707448748467  
-0. 195376730558396  
-0. 397565203269671  
0. 939800790959338  
0. 455330961412825  
0. 198303892170857  
-0. 285166826099882  
-0. 616158894467543  
-6. 602578452006730E-002  
-0. 194083003219260  
0. 379077970018621  
0. 199316385766375

0. 194278654886363  
0. 160852629265459  
0. 202563263847376  
-5. 075338464682535E-002  
-0. 161983832965483  
2. 085378097511292E-002  
-1. 04923620236982  
0. 973027180237336  
-0. 473285062114131  
1. 05373839035043  
-1. 89261194036251  
7. 995386605987004E-002  
-0. 704436472412837  
0. 762339253015138  
0. 314148265724979  
-0. 335510923915552  
1. 02806408613608  
7. 384676334100107E-002  
0. 303815130156239  
-8. 415243104501194E-002  
0. 246650259358014  
0. 175395127278911  
-0. 246336658936432  
0. 563794332496251  
-0. 815084727228027  
0. 129585690494476  
-8. 840481271674695E-002  
-1. 34950640790242  
1. 12274670466260  
-0. 361374771068508  
1. 01884395438106  
0. 863042274073451  
0. 914410202955949  
-0. 146615903400786  
1. 330489890890754E-002  
0. 584767689064799  
-0. 352904847643028  
-0. 342697356703141  
-0. 576176986731279  
0. 236673221730413  
3. 895967176179703E-002  
0. 107365671261185  
-0. 356613021978684  
-0. 293647054752672  
-0. 414033805212122  
5. 760207210607472E-002

-0. 231582223984883  
0. 983170305423387  
-0. 414832267047141  
0. 752132014011135  
-0. 196577932229251  
6. 730359055284067E-002  
-1. 89394514552653  
-0. 272139316199793  
0. 499047155732928  
-0. 727865098306960  
-2. 950151839057896E-003  
-5. 882782983592375E-002  
0. 588059324761703  
9. 280366997937593E-002  
-0. 319969027581354  
-3. 081787448539602E-002  
5. 108119774084081E-002  
-0. 101541507508218  
0. 581866875242212  
1. 069343299522991E-002  
0. 879962868531293  
-0. 930038992237826  
1. 38691698635130  
-0. 395837204245858  
1. 72812633637835  
0. 307211395387839  
-1. 01481370329536  
-1. 68674090221113  
-0. 348473402911786  
0. 274946602326238  
-0. 296742239489467  
-0. 345263805855659  
0. 366940247814175  
0. 922570111049122  
-6. 410886732190850E-002  
-9. 715487000119713E-002  
-0. 279486424114065  
0. 743076396556933  
-0. 316260535920583  
-0. 224207971526211  
-1. 09051178349919  
1. 45330418776459  
-0. 615097892122439  
0. 518079981288671  
-1. 68145329123029  
-0. 440638982616784



8. 810236275536222E-002  
-0. 104866301461946  
0. 966879093377520  
-8. 532956487343044E-002  
0. 699270049918937  
9. 581142928734081E-002  
-0. 514497957015527  
-0. 198493612419483  
-0. 625965910622155  
0. 116198314862542  
6. 123359293221484E-002  
-0. 194470416795509  
0. 996700599969015  
-9. 350369135595762E-002  
0. 301214963331876  
-1. 75130550243219  
1. 871413063082437E-003  
-2. 09784705859034  
0. 464324500367751  
0. 134403111352065  
2. 82497185590134  
-0. 662674992647961  
0. 630945241931753  
1. 20482687223797  
-7. 210671425528889E-002  
-9. 577523403066210E-002  
-0. 912287120010532  
0. 453876172474088  
-0. 436795544812595  
-0. 130755396439706  
0. 215932677299761  
-2. 183647528602896E-003  
-0. 194382470162066  
7. 075810343622622E-002  
0. 404702732044768  
0. 501525170178843  
4. 755053640926788E-002  
1. 117342024922935E-002  
-0. 948557763169430  
-0. 987038487559921  
0. 951772493652388  
-0. 577118989179166  
0. 321792479916012  
0. 823109876517850  
0. 397302571938644  
0. 431311362018043

-1. 12956636993769  
0. 167942949974703  
-0. 182467478488410  
0. 312828628156866  
-0. 297954582709294  
0. 307143792892360  
0. 226956486694625  
-4. 320692406301481E-002  
-0. 593821946505774  
2. 895891787006212E-002  
3. 20851158874393  
3. 78672665685761  
1. 92037251006460  
1. 74383107567368  
-4. 19320655356067  
-1. 92688515773570  
-2. 79247031559742  
-2. 50125518509715  
-0. 380835455844792  
-0. 614832460718225  
1. 62772453212770  
1. 33755241135252  
1. 05352116049585  
-3. 640011896077442E-002  
1. 00486891051427  
-0. 502871475449868  
-0. 517270824904279  
0. 393650475609399  
-1. 08290022343109  
2. 31659836221491  
-1. 01417348870728  
1. 47043827130505  
-1. 14973556799088  
6. 140939066823978E-002  
-1. 87605882883784  
1. 18241235472237  
-0. 834942350857031  
-0. 144520071512388  
0. 355404024351975  
0. 224850871156911  
0. 125262581183052  
-0. 634945273504652  
0. 388236093951848  
0. 146400834903130  
-0. 271662222819900  
0. 137979643988505

0. 376729635800378  
5. 276025749690240E-002  
-0. 349673491765205  
2. 64637099816337  
-1. 09111898195287  
1. 09341853238086  
-1. 40703807084113  
1. 81926733414746  
-2. 30566694756432  
1. 23710421637781  
-1. 30471860600918  
-0. 245791955825743  
0. 400384328371914  
-0. 738994767667889  
0. 380546102686856  
-0. 458233135862057  
0. 612084228804778  
0. 275811552735524  
-0. 165678304589011  
-0. 142249035511362  
0. 217240656239904  
0. 124937717862991  
-1. 11953479271315  
-0. 465172015749668  
0. 407055677434213  
0. 876737078153602  
1. 12395002590689  
1. 47351047017128  
-0. 339584609467053  
0. 182931382662340  
-0. 890592172639456  
-0. 251035371336382  
-0. 648527317210342  
-0. 615814386645025  
0. 234313538081699  
-0. 147154665412968  
0. 677083355674633  
0. 234359459286847  
9. 851896254058941E-002  
-0. 192307426287547  
-0. 480221647685164  
-0. 396941405372692  
-1. 15484034789705  
2. 35342719901212  
-0. 198837985707661  
2. 13248611443462

-0. 285060666844411  
-1. 63886071601679  
-3. 38890712452296  
2. 71602021560454  
-0. 463306105444275  
-0. 887956123532184  
-0. 642476914014358  
0. 620267659356975  
1. 21374259578721  
-1. 82118129058593  
1. 01117270253008  
0. 383293815088726  
-1. 59530295307441  
1. 00786752522772  
-0. 938163631291984  
-1. 712763059669579E-002  
5. 799809210211102E-002  
0. 325584344985173  
-8. 029421843508605E-002  
-1. 43997706153040  
-0. 166705678641875  
-0. 101580929130339  
0. 345479585028198  
8. 771992285507085E-002  
-1. 08604098239723  
0. 304093709477090  
-8. 238141471186339E-002  
0. 178774313465531  
0. 141662793173555  
0. 280578911720447  
0. 431132811422044  
0. 260676735613914  
-1. 69425535780660  
5. 706781182438064E-002  
5. 404520966377396E-002  
0. 241882025326259  
0. 385697576383022  
1. 22889052754580  
-0. 752880345983243  
-0. 859821106521865  
-2. 34902054686459  
-2. 38007060584962  
0. 782139555686810  
-0. 445970323613798  
1. 01984460057466  
0. 426336732060636

0. 653811372952500  
1. 33488953737324  
-0. 314610054099544  
4. 963122184778679E-003  
-0. 186326759917987  
0. 240321296205755  
0. 214478410098735  
-0. 151786066186002  
0. 467662757679910  
0. 241048164838448  
1. 33693797349046  
8. 727433289112861E-002  
0. 113731781606553  
-0. 637227213808885  
-1. 29394049529716  
-0. 526610428652834  
0. 410197254728052  
-0. 390445379035736  
-1. 868272098612842E-002  
0. 313650216450614  
0. 510569994353815  
0. 217110526425429  
-0. 355587321027400  
0. 362980705678041  
7. 671179277646877E-002  
4. 685139892582063E-002  
-0. 207885740937167  
0. 308048277759276  
-0. 108309523078349  
-3. 340521864419128E-002  
-0. 800697589081710  
-9. 231556581366512E-002  
-1. 64291725023567  
0. 721059643581085  
0. 955302300637237  
2. 14471030128717  
-1. 21975586881140  
0. 976716591999416  
2. 309253183338943E-002  
-1. 160213129486600E-002  
0. 116464598099388  
-1. 31266692240824  
0. 247089448458457  
-1. 08380745358036  
-0. 426728707924319  
-0. 264742019852956

0. 130551579681217  
0. 148038806149260  
0. 559610636197458  
-0. 272543669830129  
-1. 21187576494055  
-3. 236376484720596E-002  
-5. 964669458555462E-002  
1. 19246518100673  
-0. 755213905563171  
-0. 365126080077061  
-8. 499246305981095E-002  
-2. 227810062426417E-002  
-0. 163589420529795  
-0. 858214268187988  
0. 233928909983298  
0. 100558364852093  
0. 404557028024850  
6. 443962515810388E-003  
2. 957790709676756E-002  
3. 420172959447376E-002  
-5. 186058617731599E-003  
0. 246607022933343  
7. 938475682874321E-002  
4. 852882745374372E-002  
0. 156617492424736  
-0. 625849778866298  
0. 394204914901963  
-0. 406333090714870  
0. 154978842652510  
-0. 788328709532371  
0. 791129180732961  
-0. 184364902062146  
-0. 305755612669269  
0. 193417891473239  
8. 085832321424964E-002  
0. 912867016716048  
-0. 288829313188260  
-4. 200308802395141E-002  
0. 245462219432834  
-1. 809839701916248E-002  
9. 678496636415654E-002  
0. 664376519522815  
-6. 198396893754660E-004  
-5. 247493923771572E-002  
-0. 592535581803463  
1. 29035960115087

1. 05876849336457  
1. 07178005515310  
-1. 25845821109843  
0. 441700057520998  
-1. 01662718658578  
-0. 946844098421947  
0. 435519692020481  
-0. 528790117112114  
0. 488286702662947  
-0. 357420698934838  
0. 556364795674651  
0. 228407609418137  
0. 529155006292398  
0. 117636033143743  
-0. 381558619852048  
0. 343351166696513  
-0. 708123984003939  
-0. 751140753855023  
0. 471338383141458  
-0. 542457442216823  
-0. 542686635130793  
-0. 403014961351878  
0. 448302518120306  
-0. 301791764854647  
0. 299281023995928  
0. 294495624147313  
-0. 527349998610858  
-0. 465464917345506  
-0. 150792481849658  
0. 142633023054204  
0. 369425793719887  
-5. 773246645539368E-002  
0. 137755753279366  
1. 437615240688654E-003  
8. 014158238328846E-002  
1. 406344837844251E-002  
3. 494174049242155E-002  
0. 583226506965140  
-1. 49254994422524  
3. 26021715273075  
0. 758914693526218  
1. 61905439300260  
-0. 714205655864376  
-0. 436585920117882  
-3. 52112845227972  
-0. 427248073504878

-0. 394776056767537  
-2. 23694807670917  
-0. 280716534533791  
0. 658348487216711  
1. 69249595178000  
-0. 771307037535911  
-0. 509973751425346  
-1. 648437167753502E-002  
1. 09942623037221  
-1. 71629070620053  
2. 88568240156782  
1. 735230341982898E-002  
2. 377612450262511E-002  
-0. 674170267305949  
0. 225653102902219  
0. 269613808282359  
0. 746501455060592  
0. 606581916688135  
-0. 765062865967744  
0. 278997993586797  
-0. 197949447337726  
-0. 730549213950282  
-0. 362004874082847  
-0. 400155906321294  
0. 729370061579862  
-0. 150480691457305  
0. 235345962748154  
-0. 153498068203887  
7. 256845906030013E-002  
9. 996549670401991E-002  
-0. 187011104067787  
0. 131444880724054  
4. 339038369992185E-002  
-0. 752463727238685  
0. 318036623542707  
-0. 688309575489484  
2. 891095066031410E-002  
0. 116132835745276  
1. 16867759173562  
-0. 135177392847771  
0. 843027721083265  
5. 222061534377295E-002  
-5. 857635574427838E-003  
-0. 256872449133035  
-7. 696578313584052E-003  
9. 913517393145797E-002



-0. 171104882488143  
-0. 169093110343660  
  1. 598991578270602E-002  
  0. 170847853038850  
-0. 537738718125376  
-0. 321073944459653  
-9. 506684959275852E-002  
  3. 08599600406631  
-0. 475711875547492  
  0. 157659594609147  
  -2. 38775763097893  
-0. 784238443710862  
-0. 990803263301374  
  0. 456371423324563  
-3. 892137743905740E-002  
  0. 347339143719629  
  0. 629151114828368  
  0. 320398797774464  
-0. 108806147596513  
  2. 377798222935593E-002  
  1. 717745573082411E-002  
  0. 308279157848948  
  0. 326206723889023  
-0. 290375152837064  
  9. 251393500749309E-004  
  7. 037274144594340E-002  
-0. 906087881173982  
  0. 825490098759224  
-0. 581269168116489  
  1. 90456936553133  
  2. 469454049907749E-002  
  2. 12589886149515  
-0. 997069853091244  
-0. 310828582575692  
  0. 728326671822100  
  -1. 22187500557295  
-4. 346125819753300E-002  
-0. 802204505497387  
  0. 652102247730405  
-0. 368502764168435  
-0. 336095841714939  
  0. 103910024121977  
-0. 335123024681392  
-0. 396382124670659  
-8. 179277787238257E-002  
  0. 272978592860325

0. 594963117337144  
-1. 24657936402869  
0. 236656665988062  
-0. 566196477224372  
0. 330538268421061  
0. 209096826184876  
1. 41966472291168  
-0. 598295677034987  
1. 113029818414853E-002  
0. 167428564111193  
-6. 091914694599392E-002  
-4. 894475829554365E-002  
-0. 387037430159118  
9. 577787070105066E-002  
2. 763207025646345E-002  
-0. 171171321893757  
0. 238191499613955  
-4. 356190075601996E-002  
1. 755648567292195E-002  
8. 826217258954970E-002  
-0. 403551613528071  
0. 303976080025962  
1. 70337642994496  
-0. 671281599572690  
0. 242591606211822  
-1. 84154140847378  
0. 316780311145293  
0. 572791185114255  
0. 127693091054324  
0. 584470035724210  
-0. 534175403942306  
0. 355473411482584  
-0. 329361433865142  
0. 742665623006086  
0. 720152304223521  
0. 111379649262111  
-0. 461543119323146  
0. 350499430609112  
-1. 19694167788887  
0. 113466631814922  
0. 545661728779018  
-1. 78796600585237  
-0. 282358636530544  
-1. 19720878277686  
1. 04701888380876  
-0. 122517290074733

1. 95323548597337  
-1. 592880917219512E-002  
8. 499481055616855E-002  
0. 769493625098285  
-0. 440441373899341  
-2. 212514082440982E-002  
-0. 648609039048297  
-6. 262588495624209E-002  
-6. 271708687696732E-002  
-0. 173670835737700  
0. 243299397669590  
8. 736592956669213E-002  
-6. 075093506676429E-002  
-0. 104381037486916

0. 232681755258970  
0. 445193416053222  
-0. 258908682715479  
1. 13859355798832  
-0. 829018669808843  
0. 700371716849244  
-1. 02974983036866  
0. 884288549403228  
0. 685637387443409  
2. 41987827017336  
-0. 930932730474602  
-0. 641876763637627  
0. 464044788638641  
-2. 42313878704020  
-2. 37428876274698  
-1. 34367732029388  
0. 833292456024899  
0. 272560070120784  
0. 794933876648707  
1. 63391924554330  
-0. 377204735212925  
-0. 435040548659992  
-1. 59492280052512  
-0. 874300824433065  
-0. 132143281087014  
-1. 29576883409071  
-1. 30692888299573  
0. 179733178867604  
-0. 979363084335031  
0. 146323885043712

-9. 482560208668389E-002  
-0. 955733122917883  
  1. 19043347323720  
  -1. 46597083131705  
    1. 46342112597196  
-0. 413719133975778  
-0. 616284805818095  
  -1. 15069413110198  
  0. 771641412255352  
  0. 294046611670035  
  -1. 57399882638025  
  -1. 71277260615330  
  0. 115055581316528  
-0. 910252048847023  
  0. 503418213075134  
  0. 380445836350468  
  0. 581841448666041  
  0. 438702348979154  
-0. 900357076253488  
  2. 87540506240884  
-0. 615315747105769  
  0. 905810316312172  
  0. 753133412551548  
  1. 10737841313257  
  -1. 05516849131321  
  0. 858950562955973  
-0. 842535650765330  
  1. 07497298065523  
  0. 494491440377727  
-0. 964658547177425  
  0. 769840758913272  
-4. 160311801500695E-003  
  1. 03682187989155  
  2. 09433978196452  
-0. 126171821257880  
  -1. 07772866540208  
  -1. 44191246133230  
  1. 27788790810671  
  0. 673601175805762  
  7. 983823729122168E-002  
-0. 333165883934595  
  2. 12325293827854  
  0. 416945938464131  
  0. 835670146532675  
  0. 128485576080622  
-0. 762258966002479

-1. 20516705975745  
0. 124630421314891  
0. 507112260642389  
2. 02674544909241  
-0. 105280101360078  
-0. 323689617900551  
6. 327386798052248E-002  
0. 538043321414202  
-1. 54265791495180  
-0. 221348471378789  
0. 387725894140635  
-8. 294246959006861E-002  
0. 178864636344996  
0. 132079711231716  
0. 187025881607735  
1. 64471817940364  
-0. 572352493388784  
-0. 781877420920430  
3. 22221551376942  
-1. 46038064935915  
8. 700265244622590E-002  
-0. 823033030810982  
-1. 26860679014106  
-4. 163410784085560E-002  
-1. 57149219499902  
-1. 07651364662686  
-0. 926733853433743  
1. 02176256377784  
-1. 43310462688341  
-0. 352665643063321  
-0. 286845925687055  
1. 07848810295773  
-1. 68213419822197  
-2. 24584304394279  
-0. 737488230488697  
-1. 84962480116366  
-1. 54947341728192  
-1. 26756968792827  
-1. 02188599076456  
3. 09421340799589  
-0. 171713793246332  
1. 87129903610062  
0. 489920822299306  
-0. 104091040575652  
0. 360283945722212  
-0. 466184870692939

-0. 667335285461476  
2. 895520493538630E-002  
-1. 79656206793684  
0. 851837153476161  
1. 04839686251690  
6. 642184116725817E-002  
-2. 23237254396211  
2. 10204347496925  
0. 691187107002640  
0. 783282099971846  
-0. 639042098392665  
0. 848698318416038  
-0. 358392657629259  
2. 54022256753300  
-0. 160947423360317  
-0. 773103733537325  
-2. 53871948815643  
1. 23705000034676  
-0. 895934983047920  
-1. 89906075834325  
0. 438628342554154  
-0. 336361209829853  
0. 767926322241766  
-3. 18314503605044  
0. 445067745295287  
-0. 439982929674015  
0. 351768532263893  
-0. 586062878328890  
0. 929164318125735  
0. 458728500798156  
0. 490220066060045  
0. 180703686443866  
-0. 122663061318338  
-0. 353339680638788  
1. 92838309801932  
-1. 48597384001917  
1. 45725735270527  
-0. 146570823404050  
-1. 63358937243630  
0. 570896940635093  
0. 939880109066908  
0. 153553427807554  
-1. 85957093407234  
0. 161662513596054  
-0. 124664166164037  
0. 531179700055328

-3. 013054078402256E-002  
-0. 946691946807446  
-1. 25106731081499  
-0. 107463492148540  
-4. 307960507921749E-002  
2. 42004236502618  
-1. 29158100178241  
7. 977811345177677E-002  
0. 206457246142564  
-0. 780325373375020  
0. 255304061516449  
0. 298960207663627  
0. 797217894485976  
-1. 08484991875235  
0. 879100227758400  
-0. 423785730488789  
-1. 59899731332372  
0. 334724873270838  
-1. 01393728274003  
0. 157557335566948  
-1. 44832247751999  
-1. 05108391737596  
-0. 450382329627139  
0. 968133500349075  
-1. 96380717899890  
0. 453404484929967  
-0. 208910355843768  
0. 277149701395769  
-1. 13615240686011  
-0. 161986226683241  
-0. 732441460377113  
-0. 458082443852492  
-6. 815809863723943E-002  
-0. 797988643640100  
0. 571927670333732  
-0. 734276115695886  
0. 337093270175647  
-1. 00698722028020  
0. 333667138487053  
-0. 163837712829197  
-0. 233768043842068  
0. 518889851776196  
-2. 036555254362863E-002  
-0. 413960503384589  
0. 351113632842193  
0. 331706582504730

3. 95354616315101  
-2. 11704612875526  
-3. 13553103127253  
0. 701740713185389  
0. 943283964027637  
-1. 99089159070272  
2. 67010254770398  
-1. 34707082761393  
8. 811459753463097E-002  
-1. 390774114501691E-002  
-2. 266599371526001E-002  
-3. 01260656059572  
2. 27127912376775  
0. 470649209471038  
-1. 86172833126695  
0. 659939386044968  
0. 533915390320361  
1. 59790368816178  
-0. 879545511657250  
2. 06000367000938  
-2. 81113617630731  
0. 572688294589949  
-0. 775981238874515  
0. 948630877044017  
0. 447790115850464  
0. 794289914052733  
1. 13913942658155  
-0. 554532308400155  
0. 781418583897950  
-1. 08843226508187  
-0. 528259002470654  
-1. 70852244009235  
-1. 36589240213784  
1. 44344152694817  
-0. 624143366390911  
0. 950965600842279  
-0. 401506789264941  
0. 867707887895120  
0. 245242539441857  
-0. 394348637923931  
-1. 09027117845534  
0. 843309446467323  
-1. 52475194406252  
0. 377748665759524  
-1. 03865952389268  
-1. 22130921823264



0. 315739647805011  
-1. 43241789915729  
0. 447281667223103  
-1. 69640394066268  
1. 38838062146190  
-0. 847351455157434  
-2. 13119950990028  
0. 126922786364835  
-5. 808994335441709E-002  
-0. 534174086495291  
0. 144704352482635  
-0. 534958609093235  
0. 438094734449156  
-0. 804750579359118  
0. 603504501385069  
0. 281637487570155  
-0. 799531678353035  
-1. 48238180799442  
0. 136071250679806  
0. 189765290313737  
-0. 734970422208586  
-0. 899327267237695  
-0. 829100029087017  
-0. 568161855236144  
1. 15680054602686  
-2. 940575763006890E-002  
0. 716217214082458  
-0. 352719868382798  
0. 802950680083124  
1. 12577687256596  
-0. 248823129342136  
-8. 774934440436323E-002  
0. 851168839070120  
-0. 592150036825526  
0. 930010611587236  
1. 17258600834274  
-0. 248588736778174  
1. 25576510140912  
0. 672567211037914  
-2. 09571267819124  
-0. 766667463990272  
0. 640771150722782  
-1. 79732420941419  
-7. 449964999271937E-002  
0. 219988258849512  
3. 04713677986325

0. 664961226408205  
1. 48123740142412  
1. 13997800242347  
1. 12557472515524  
0. 165162677410859  
1. 70895842204360  
-1. 03077402052381  
-0. 575235676553896  
-1. 64382546756584  
0. 523441237529065  
-1. 36276881905726  
0. 199779572890043  
1. 84479279991641  
-6. 13656858911536  
-0. 937193971368943  
-2. 33898915721954  
-0. 705786608167085  
0. 530930560580322  
-0. 916913357573516  
-0. 502410527178904  
1. 37487337117050  
2. 75881102285004  
-0. 610766604755018  
-1. 08194949215549  
0. 139966861498959  
0. 303212259571390  
-0. 591162702095985  
9. 888452102049297E-002  
2. 72980392980314  
-0. 955733955131272  
-0. 690224340414054  
4. 25522770935145  
-1. 25494583326575  
-1. 06531733739078  
2. 39377078351070  
1. 82204053829645  
0. 134646941274406  
2. 41077366175028  
-0. 678156012086684  
-2. 03112858262993  
0. 483972670065686  
-0. 261279225109007  
-6. 926642229679127E-002  
1. 20985021609582  
1. 63486578474745  
2. 49049416248107

-1. 04209135297006  
-2. 87110027557955  
-1. 60628550439482  
-0. 486734393498750  
-0. 183201075001776  
1. 53816524876116  
-0. 730154921967422  
0. 230782890511299  
-1. 12874409389601  
0. 453390188556839  
-0. 715908229936378  
0. 268261338204422  
1. 60512925588524  
-0. 792706027828610  
-0. 536587761516489  
0. 282028950074020  
0. 183937231085296  
-1. 50950365230108  
0. 122946852977652  
0. 280106729226954  
1. 46731328817569  
2. 14082314633870  
-1. 01773608585670  
-3. 57460186257548  
1. 40615230223625  
-1. 63626393114585  
-3. 11697094113592  
-4. 31421693421464  
1. 43508211761767  
-0. 672765084653775  
-1. 01825142551865  
1. 90879304912345  
-1. 85245950126390  
-1. 64025140495826  
2. 13967589358319  
-2. 82878497871108  
-0. 425129606535403  
1. 07978381848342  
-0. 509085560009342  
0. 941593914738416  
0. 470625041377566  
0. 752926509565801  
-0. 306093483508009  
0. 806063062702609  
0. 401145730660313  
-1. 43584324668927

0. 335845653734280  
0. 557641599866331  
1. 13781559321501  
-3. 89489100166437  
-0. 378703582651792  
-2. 51297711850293  
1. 54466724082314  
2. 15952075727571  
0. 659739290190555  
-0. 640240218153037  
0. 692856585472818  
-0. 450869816095224  
1. 13036340482617  
-0. 648776314583137  
-1. 17703319465127  
1. 13343768430551  
-2. 51975114458565  
-0. 929000532532484  
0. 632631878381766  
-1. 40366912453850  
1. 75884843922799  
2. 09241649785571  
-0. 696181720422815  
0. 986512962360667  
6. 721769057485567E-002  
0. 753267527803086  
1. 18414401465886  
-3. 472064244279022E-002  
-0. 802541789322135  
-2. 22661446772031  
2. 62917697320823  
-4. 716674552061058E-002  
-1. 33249891922220  
4. 243582676189399E-002  
1. 47087048605451  
-0. 476623530833303  
0. 526604552463126  
0. 855687734333906  
7. 502483339466301E-002  
0. 356406129294872  
0. 125633870559997  
0. 926967466508366  
-1. 23682835862046  
-0. 419594266637844  
-0. 217175541163523  
1. 31517855813504

-0. 306332510057401  
3. 73794366532567  
-0. 799234336928293  
0. 527024018410227  
-1. 879470196252991E-002  
2. 010677642565189E-002  
-0. 396459604667637  
-1. 28650819077155  
0. 524623269964239  
-1. 80990805222527  
1. 51525601662692  
0. 161817564359091  
0. 271819960424479  
-0. 740575879981450  
-0. 595683183571939  
-0. 181506867345931  
-2. 08707657551511  
-0. 364049335618905  
-0. 594161727904196  
-0. 440542660353746  
-0. 249774306560778  
-1. 32412677838533  
2. 14650905051979  
0. 208404365437665  
0. 563109332627492  
2. 54285227247378  
-0. 959132524616936  
-1. 24234289844020  
0. 272086785163188  
-0. 382089779178013  
-0. 631102070830496  
1. 14385994540013  
0. 839945172216588  
1. 12523953803614  
-7. 009402838539369E-002  
-0. 255128227149173  
-4. 932194678225041E-002  
-8. 033601303986605E-002  
-0. 534433282274254  
-2. 36856152304394  
-1. 290413467653726E-002  
1. 10056703134200  
-0. 314061337249220  
-0. 976133943232511  
-1. 00513567599560  
1. 34425476865075

8. 126707043631634E-002  
-1. 09364080869575  
1. 27666655954063  
-7. 375230821834770E-003  
0. 535467469483034  
1. 65750911327730  
-0. 545837995764159  
-0. 698701363713843  
-1. 33693871641168  
2. 06578049472408  
-1. 24266921872891  
-1. 82947659854930  
0. 189127898283589  
-1. 74374044360537  
0. 579296498726240  
0. 150227798294031  
-1. 21904534431913  
1. 14242652633950  
1. 01985461283373  
-0. 327766439582407  
-0. 727188657035799  
-0. 388940856116421  
-0. 844406526023788  
-9. 465274509438225E-003  
1. 61943296574446  
-1. 38669158426328  
0. 721633875794675  
-0. 227193909238995  
0. 215374672777073  
1. 25914917689881  
-2. 37035926387805  
2. 70875936414926  
1. 48501195800535  
2. 60028268077862  
-1. 71779828957972  
-1. 74758386197722  
0. 660165046326178  
-1. 49104584560731  
-2. 11490334126948  
-3. 03413289849224  
2. 10247024676207  
1. 66635065760554  
-2. 10704232761130  
1. 30314563845937  
-0. 276099715925848  
-1. 85519571959693

1. 55631558036864  
-0. 520295091263941  
-0. 813889332162398  
0. 195893827788069  
-0. 545554051526852  
-0. 173878945648906  
0. 285229804715977  
0. 900097173354296  
-1. 43242545051325  
-1. 84417706498359  
-2. 20225893866597  
-2. 561562915556584E-002  
-0. 248548208834631  
0. 367266203541540  
2. 94145737506364  
-0. 865524965046172  
-9. 017027292838135E-002  
0. 205783787295244  
0. 196942164685412  
-0. 892697252415638  
0. 496841188129748  
2. 742343609353335E-002  
-1. 04719854897080  
-0. 875470298652034  
-3. 653900705102334E-002  
-0. 433399188241735  
-0. 229987016472496  
-0. 492057403137129  
-0. 803845228553846  
-1. 83304262170103  
0. 212663116766030  
-0. 621736124054521  
0. 403570466590652  
0. 133968940963606  
-0. 837135729198596  
0. 138913313241206  
-0. 203953670035637  
-1. 31207748028589  
0. 136496068478191  
0. 400465027651354  
-0. 633177066649784  
0. 738070385570967  
0. 460701015947486  
1. 49429721227994  
2. 01252163709912  
0. 571082039325903

1. 34894237569311  
2. 24671395951368  
-0. 841830434202524  
5. 806592390189261E-002  
0. 514711445318288  
-0. 729366633815457  
-1. 54999112737002  
-0. 454905003779991  
1. 60241496089241  
2. 50875106458362  
0. 436468277047379  
0. 559016593637125  
2. 780169179190978E-002  
-2. 21786178092514  
-0. 993824524922089  
1. 09889531272363  
0. 834265916451738  
-0. 742556514560794  
-0. 240945462384413  
-0. 310981268970110  
0. 306833352714622  
-0. 595537205141456  
1. 262538192992122E-003  
-0. 973317612102903  
-0. 241714396968355  
-0. 571483217292044  
-0. 625814396593653  
0. 748864912929475  
-1. 43132946023264  
0. 320082542488487  
-0. 609099428976539  
7. 571763069785915E-002  
1. 51119571513324  
-0. 607062096013738  
0. 787052166864231  
-0. 760557727924871  
-1. 84712759611139  
-1. 15712615863416  
1. 17267603953684  
-0. 612074465766176  
-1. 25038151710572  
0. 808826253157665  
-1. 89712866624042  
-2. 13914450994657  
1. 20179281084568  
-0. 793518146338734



0. 273714457108613  
2. 32628217161340  
0. 802599106126231  
-0. 353422449071769  
-0. 408370800268719  
0. 816606028525447  
1. 15938747645929  
-1. 41116640830648  
-3. 61057593406217  
-1. 91707646192217  
0. 757668712188560  
0. 882567125230953  
1. 31181197239801  
-1. 02361689760208  
-0. 126733323393065  
0. 484475093994376  
1. 22128365335381  
-0. 122348885258003  
-0. 336092771187091  
0. 269763413258573  
0. 225750108026088  
-1. 20533210450985  
0. 742982980961071  
-0. 999011018680533  
-1. 31244292887797  
1. 87076582616572  
-0. 139179285057647  
-8. 146011695221535E-002  
1. 57206630793198  
0. 311105357235840  
-5. 161898714826758E-002  
1. 32850448903133  
-5. 582598611708989E-002  
-0. 415612861842824  
-0. 586564144381649  
1. 98073235684787  
-1. 47814425521530  
1. 14033775991207  
2. 59085469217981  
1. 60808005052455  
-3. 800250771002273E-002  
1. 15092119519891  
-2. 80661823625015  
1. 71802665445984  
-0. 400118323030651  
-0. 836314025584204

6. 454049466880499E-002  
1. 43056504227168  
-0. 585164348558636  
-2. 037534016086194E-002  
-1. 71502314734041  
-4. 20913782047125  
-8. 399672173205626E-002  
-1. 14237824967886  
-0. 214900935638429  
0. 683256154527811  
-0. 567592059625883  
-1. 97011617851479  
0. 626534359365620  
-0. 388903670003832  
-0. 684504443197740  
-4. 597409760081241E-002  
-0. 180988274334879  
0. 126641239020463  
1. 07457579036384  
5. 023115393332112E-002  
0. 867600845671662  
-0. 475952059314101  
-0. 733699180642278  
-2. 91981296596246  
0. 307155217831309  
1. 78220846952507  
-1. 91501715793962  
-1. 46554681361418  
0. 557172444383948  
-0. 318109095605121  
0. 896562615953855  
0. 633522333122630  
0. 779071266596376  
0. 320787672666143  
-1. 56973217972440  
1. 96051018622891  
-0. 798417951667898  
-0. 697495446088822  
0. 252167390055593  
0. 597116241297921  
0. 828468927678472  
1. 05076469440983  
-1. 51747809405417  
-0. 804480975951781  
-0. 108352932103668  
0. 298902406335462

0. 178619846558976  
0. 300750803538206  
-0. 505367776790921  
0. 524883808631945  
-0. 611846216310102  
-0. 445389251515685  
-1. 56291973981619  
1. 49201100817961  
-0. 798076104895390  
0. 382637795836601  
3. 28157601602117  
-0. 581351714696671  
-3. 482437215451225E-002  
0. 675177245738085  
-1. 02602963995293  
-0. 744682100295264  
0. 383397550240853  
-0. 150544050864705  
-1. 03228235365469  
-0. 327321622030375  
-0. 134510508722582  
-0. 633643773553021  
-0. 454312493505166  
2. 739896514495164E-002  
-0. 136516823355361  
-1. 30125904399154  
-0. 210729520517353  
-0. 316355887371947  
-0. 376072582196345  
-1. 34339449322148  
0. 689906227360392  
-0. 820575637634642  
0. 283589384938992  
-0. 790308937971681  
1. 43116757971407  
0. 810587631277913  
0. 942825772003968  
-2. 04542153387027  
0. 668075966676384  
0. 710656078759541  
-2. 44203071968693  
-1. 78097155353742  
-1. 24632869203638  
-1. 19423201622349  
0. 942436177538058  
-0. 375976820221843

0. 103611761972170  
-0. 524228613506022  
-0. 892292201547695  
1. 30142396134788  
0. 608102183793031  
-0. 809706243496458  
-7. 810235061333368E-002  
1. 48793124511910  
-0. 182377594595407  
0. 734143387827952  
-1. 16483270710216  
0. 486640276075185  
0. 733678785777445  
-0. 722663795785528  
-0. 860925857228344  
0. 496707699922727  
8. 193559253667065E-002  
-0. 796495909088102  
0. 424074047743013  
1. 41141697562673  
1. 86154447557455  
1. 71463339824601  
-0. 449480723849997  
-0. 900448004913006  
-2. 11179805422151  
1. 50328798521706  
0. 226148819404448  
-7. 433082118023210E-002  
-1. 47385578436848  
-0. 159609687679412  
-0. 308144469951002  
-0. 348346232601123  
-0. 374110130969056  
-0. 189970169530618  
-0. 413543731422442  
1. 21839680218042  
0. 713160786861563  
-1. 93809649950754  
0. 527304407749584  
0. 574435789445739  
-1. 54255696490710  
0. 717139514509193  
-0. 177878353830829  
-1. 43759211650748  
0. 946654883636918  
-0. 424982286122230

-0. 516723998525675  
0. 930222344484597  
0. 252320221655597  
-1. 50275395908430  
-1. 16655138286320  
2. 31512381118431  
-2. 06650939082986  
2. 612288521060493E-002  
-0. 907167387026416  
3. 27995293362575  
-7. 975114351252020E-002  
2. 16491484764615  
-0. 317755986715515  
-9. 199607110075601E-002  
-0. 840961264718615  
6. 021230649210579E-002  
-2. 24688007443533  
-2. 18192958053500  
-0. 239117769423035  
-0. 443599076879434  
-0. 278103536675654  
-2. 23300247597513  
0. 111161444773233  
-1. 26686434951353  
0. 855824756573484  
1. 19463038203145  
-1. 66618055372149  
-0. 666474415098994  
-0. 429412398676644  
0. 507389591860908  
0. 929479954975323  
0. 802693489388540  
-0. 874022850532839  
0. 411550704215425  
0. 552786127100838  
-1. 56087071403045  
1. 13290375368950  
-0. 250450317835822  
-2. 26325235623241  
1. 828005660504849E-002  
-1. 20842959043732  
-0. 454316115462397  
0. 148256547754769  
-5. 268301924541589E-002  
-0. 406920811672540  
7. 538267187189183E-002

1. 39087165144677  
-1. 69857125652672  
3. 737381105514187E-003  
-0. 221872540432567  
0. 932382089532263  
1. 88267058703673  
-0. 526732384742511  
-0. 131913410661940  
0. 475945136844262  
-0. 893471254844111  
0. 355717743373846  
1. 15440191456324  
0. 412188459718444  
-1. 30744410997964  
0. 573880932486426  
0. 258188022245321  
-1. 58428403703732  
1. 87757580162894  
-1. 02680688978263  
-1. 56041376185061  
-0. 423740479670406  
0. 214753760947253  
1. 50080728872759  
-2. 30806045553109  
-3. 738349613077196E-002  
-1. 82991093688069  
1. 27298360128902  
2. 17901410383427  
0. 979701859402302  
-0. 226628952333629  
0. 775958582725462  
2. 08693594350676  
-1. 45196336228036  
-1. 60461497449023  
1. 24218111003065  
-1. 56013596422273  
0. 748072166501230  
1. 07932372502218  
1. 964229859467606E-002  
0. 516607393781388  
0. 681360518386677  
5. 513282361408037E-002  
-0. 388327361413057  
-0. 565678859529282  
2. 167354482070947E-002  
0. 172841891669896

-0. 653682300297705  
-2. 13417562942269  
-1. 06362318290515  
1. 31112945220558  
0. 125254599977083  
0. 702235550984877  
6. 150692652739216E-003  
-0. 848622832944689  
-0. 340051528603837  
0. 720136002591226  
0. 944484356131776  
-2. 279374687271934E-002  
0. 643391914273760  
0. 361793587177295  
-1. 80197787690554  
0. 970168349239232  
2. 727794239499571E-002  
-8. 320979865904854E-002  
0. 157635923947909  
0. 416072371137239  
-0. 646827950423176  
0. 271483339990490  
0. 485790754686077  
-2. 63649072145877  
-0. 438207376443304  
0. 424868198512922  
5. 368081126645598E-002  
-0. 737553623231429  
-0. 514763098553323  
-2. 52684167441677  
3. 74223932308146  
-0. 339799341608507  
-3. 02945971920840  
-1. 83848755235350  
-4. 25825083126612  
-0. 747254843837883  
-0. 959627094043177  
0. 747312182250625  
-2. 55142997669382  
0. 568050401849759  
-3. 960057941884576E-002  
-0. 964557802739548  
3. 52003098645738  
2. 071645335203253E-002  
-3. 43357341992041  
-1. 16134625235948

0. 434664275415802  
-0. 922848082548788  
-0. 434372077868337  
-2. 53932329356889  
0. 576133376329716  
-0. 875641901024409  
0. 893822431901146  
1. 01829353261302  
9. 548665127393810E-002  
-0. 607451130920621  
-0. 892982091690568  
-0. 635448404309200  
-0. 274785972011112  
-0. 913177088867011  
2. 41220938587918  
0. 442378546117088  
-2. 49330579787073  
-2. 49302828742282  
-4. 520026013661845E-002  
1. 22618967715608  
-0. 896267874407827  
-1. 35548958404840  
-1. 51176860116772  
-2. 57612737680818  
0. 980904921842654  
1. 52192149533856  
1. 48904137724097  
-0. 658971145722786  
-0. 437289865769360  
-0. 535873259500262  
0. 325122941072120  
-0. 918340774407999  
4. 145874684813524E-002  
0. 404355027689974  
-8. 755914361794333E-002  
0. 481582974649148  
1. 05748408401907  
-1. 67741148576252  
0. 561094110461788  
1. 82212705705774  
-1. 50824676671889  
0. 643308758384739  
0. 306302336477388  
0. 777906449423711  
3. 96832493810555  
2. 45384951706608



2. 97209176184614  
-1. 24213080433459  
0. 607402866805928  
-0. 947711760952989  
-7. 17858821220995  
2. 97127583334542  
-1. 503414469762772E-002  
-0. 618124755903794  
-5. 65144085220689  
2. 52390389670506  
-0. 184097051931186  
1. 17403336594685  
4. 99594717086515  
2. 85326047605201  
-0. 372693745529454  
3. 40081242188596  
1. 85723814625504  
-1. 57418048321931  
-1. 16952612368513  
5. 94440780999233  
1. 05034679716748  
3. 07970471061777  
-0. 335140892876346  
3. 05641167985275  
-0. 545683086254032  
9. 520418229639727E-002  
-0. 397667830215817  
-1. 86273758895584  
4. 22541222747734  
0. 734372724092299  
0. 352846305778276  
-3. 38187648408481  
0. 676622006331653  
1. 97336212880663  
-4. 55429276979533  
1. 20885957191739  
0. 792512011590900  
-0. 371393115719152  
-0. 911537380002275  
-0. 325098178921177  
0. 491868706880496  
-0. 277795270439548  
0. 216102882650963  
0. 201748752797609  
0. 526836413085397  
1. 36840012911306

-0. 263642632778238  
1. 45567510353884  
1. 09335521016846  
0. 690066851447077  
-1. 33662224122764  
-0. 286278578091862  
-0. 354796014948840  
0. 645088374151463  
-0. 234642085675384  
0. 506974743645567  
6. 879778883257591E-002  
1. 02575382093170  
0. 166110731982578  
-0. 228632589075155  
-1. 33433417164857  
-0. 494024778121096  
-0. 668473703223750  
2. 07627721009059  
-3. 22750068081655  
0. 761748704938626  
1. 05570332093918  
1. 65298863754711  
0. 816045465785274  
-1. 55982318457636  
-2. 28658033042499  
-0. 210367417037854  
0. 882513748670833  
0. 565168749287166  
0. 451848263953138  
2. 11891373359290  
-0. 530648347712341  
-1. 83974717209670  
-0. 498615984609383  
1. 31888334746373  
-0. 330255543470929  
0. 815731682938648  
0. 212534569175485  
-0. 844042730432117  
-0. 532588992086594  
0. 761974515593924  
1. 00757746521137  
-1. 23994138774602  
0. 214868880926105  
0. 869602405383888  
0. 718233255876273  
0. 822409015119224

0. 438415055865276  
-2. 36754270303247  
-0. 493141007655972  
-0. 401486001116781  
-0. 285552957429213  
-1. 17778754072841  
-1. 76506710209131  
-1. 61643397585535  
-2. 00807791277067  
-0. 181214833592654  
-0. 292873921838802  
-2. 21768181332095  
1. 62939844932228  
-0. 365439853453255  
0. 196174889754703  
-0. 390211407826028  
-0. 129118758760170  
2. 89146518316091  
-2. 11182789291781  
0. 524499157647349  
1. 31688702778201  
-1. 40381820654539  
-8. 763859230770300E-002  
5. 758389461538701E-002  
0. 347864740959008  
-1. 69704396805687  
3. 00837106911976  
0. 369116702319729  
0. 346654657013128  
-2. 54737486768307  
1. 63364777536217  
1. 94609445226398  
-3. 56329742769287  
-1. 29356463183782  
1. 23447284499069  
-0. 560082760926658  
-0. 869672788714239  
0. 747432898541534  
0. 276632771989619  
-0. 336827874332185  
0. 380435267490421  
3. 83795429672763  
0. 984283388584874  
1. 62366078461279  
0. 234240511329122  
2. 48396729246082

0. 291087299713213  
1. 27099737552783  
-1. 81467430687061  
-2. 27775297320978  
5. 268900933067344E-002  
1. 57712594057781  
-1. 38345160973629  
2. 29718388995641  
-2. 12700443615373  
2. 19597040115782  
-0. 727300648607518  
-0. 323046500667062  
0. 989558728867923  
2. 10797636185057  
0. 935658793159712  
0. 884848733942386  
3. 67723953341338  
-0. 908868034866295  
1. 37512014904660  
1. 42055635166736  
-0. 624501112801595  
1. 39553639753768  
1. 22411993459866  
0. 498602668285038  
0. 787396745542679  
-1. 01098405854078  
-1. 05833356607377  
-0. 701417448304301  
-0. 725461125562588  
1. 26536701588285  
-0. 580073561081406  
-1. 19630758950245  
1. 09078471363441  
-1. 62989891935533  
0. 706279586666776  
-0. 178363891065702  
-0. 378971912626230  
-1. 13766454158292  
0. 218197419864766  
-2. 01729887412150  
1. 10024589486224  
-1. 18349824556261  
0. 654980902331855  
1. 31067580997070  
2. 00974472250467  
-1. 68932316030610

-0. 546767937859811  
-0. 661959400319039  
0. 614913829693325  
-0. 384388759354771  
-6. 115277468326411E-002  
-1. 67135482279552  
-2. 11062716957029  
-1. 04407014605553  
1. 39200792638876  
3. 56414297430825  
0. 455351972595124  
0. 559995745205310  
-0. 231561710375538  
1. 72368147526462  
-0. 605819672704010  
1. 56218069060283  
1. 33120609286670  
-0. 697803222406222  
-1. 16573774080647  
1. 74228058149122  
-0. 422301073480830  
-0. 971690198972721  
0. 132605693798970  
-1. 22641334860181  
0. 456483839819933  
-1. 37452514055844  
0. 491139951177435  
2. 04832048857132  
0. 661678608805883  
-1. 82499548294789  
-0. 410534115066437  
1. 08901749253457  
0. 202845821204249  
0. 962213158134811  
-0. 541365858309571  
-2. 43312538750509  
-0. 483228367261226  
-0. 656350379747188  
0. 106685396747916  
0. 198855455857371  
0. 678789714518647  
0. 695424744340828  
-0. 707896478911288  
1. 07862272555435  
-1. 57839514494983  
-0. 365697747378477

1. 76118330692277  
2. 285853049893290E-002  
-1. 36169832120888  
1. 03022244327996  
-0. 553405511349822  
1. 21250850206889  
-1. 18886075194442  
1. 04723577274462  
0. 546264961353421  
0. 410896196393771  
1. 66383088630666  
1. 49348204092051  
1. 75102433711394  
0. 914023718011486  
-1. 77267073021258  
2. 19591513340438  
0. 157173404620591  
1. 27183866265364  
-0. 149491757583690  
-0. 423313943266177  
-2. 26879866143077  
-0. 122385122238862  
2. 03157943129861  
-1. 48863841970803  
1. 26603751710306  
1. 59943255512217  
-0. 851900364557256  
0. 969890481661660  
-9. 030346508189553E-002  
1. 920800737551398E-002  
0. 627567030441215  
-0. 401412402918055  
-0. 421126191364450  
0. 561889755463381  
0. 164357617337020  
0. 390353892495122  
-0. 164148301684880  
-0. 197939126176337  
0. 787299396719169  
-0. 571028275460588  
-2. 83325631359549  
0. 710984488918574  
-0. 895098684447402  
-0. 156610567661709  
0. 608260176822440  
-8. 892767484282199E-002

0. 106436138189416  
-0. 578179676578757  
-0. 276030905910216  
-0. 785355329223091  
0. 348715024237845  
5. 879428722010976E-002  
-0. 545439985025483  
-1. 81732195585955  
0. 265468685839313  
-1. 98299575196683  
-0. 194921825711043  
-2. 10302217460745  
0. 194072240980042  
-0. 485142175147227  
-0. 440159717093409  
-3. 557831532512701E-002  
0. 441852014869631  
0. 237850033023333  
3. 61254810673840  
-0. 588938479398015  
0. 940587334704860  
1. 98486092404788  
-1. 68092339799475  
-1. 50732312122745  
-3. 91354083184422  
-0. 581011184454500  
-2. 25538290245091  
-1. 09634465506344  
2. 58794319419925  
-0. 582855329656065  
0. 152677604624010  
-0. 387496457325574  
1. 89113779964088  
0. 422076440513291  
-0. 408909700437957  
1. 94611189055980  
-4. 18182336109779  
-2. 22147443006025  
-3. 24447162180156  
-4. 33462520182444  
-0. 144954033552366  
-2. 17879138192855  
-4. 878084804650696E-003  
-1. 06274085209734  
1. 20780755650004  
2. 58681408998892

0. 665744319880288  
-4. 66121901415331  
1. 17696430671951  
-0. 448642937225473  
-0. 677679528211337  
-0. 721763368439681  
0. 928358346332946  
1. 68001484543103  
0. 605329391174322  
-2. 62125885031248  
-0. 890282990268653  
0. 512706659052467  
-0. 675665576409609  
0. 921016866609966  
1. 10157110830096  
-0. 620932401250088  
0. 471863987481635  
1. 15899719568785  
-0. 710649465503749  
-7. 691747642574762E-002  
-0. 184030747143765  
-0. 723614190652613  
-0. 458533098486435  
-0. 503779815668196  
-0. 502895700018063  
-2. 16041776342395  
2. 34218961773576  
-0. 488512717637271  
-0. 847333358394809  
3. 57551672158615  
0. 125211236422698  
-1. 23378016225908  
-1. 21054900595638  
-6. 314889048555056E-002  
-1. 16849304604813  
-0. 150710946952997  
-0. 833054077609539  
4. 849795655561474E-002  
-1. 37643622130446  
1. 38111684718843  
1. 51554636176796  
-1. 36869276508892  
-0. 997681284486183  
0. 311460244674490  
0. 774274137472844  
-0. 360676622208133



1. 60319479899028  
0. 146226232188631  
0. 618408026576217  
2. 253702073939683E-002  
0. 477245945625610  
-0. 151680202685471  
0. 527492314265415  
1. 89694970607991  
0. 150498996951892  
1. 95207145746571  
-1. 10505909170409  
-1. 62331408102090  
0. 938347123608191  
-1. 70583404663553  
-0. 138458313810234  
-1. 14472874907711  
-0. 507264206833480  
-5. 802477725046342E-002  
0. 324058334215275  
0. 284825267562152  
-2. 18523540625527  
-0. 912570586192852  
-0. 449194271004684  
-3. 16187826906285  
1. 00545592282009  
2. 00424184947824  
1. 22573351198865  
-1. 13421146974300  
0. 363777067994685  
-0. 710950969159897  
0. 666305306851566  
-8. 200422248599286E-002  
-0. 998774759526526  
-0. 158433572191254  
1. 91318618447352  
2. 81454322016861  
-0. 355276298022316  
1. 01114652440876  
0. 691303807003974  
2. 24487360076983  
0. 453241934579556  
0. 294819918786664  
-0. 667598091760678  
-1. 46428306893346  
1. 30686477680077  
0. 377518533087398

0. 396436691093495  
0. 688389965976883  
-0. 332141490758461  
2. 45943674053515  
-1. 07800451699747  
0. 686203059091572  
2. 45674863234278  
3. 67677759640184  
0. 744803906051115  
-2. 17033223824881  
0. 150535872961317  
1. 43852863658979  
-1. 02471810586766  
-0. 267714210977955  
-1. 69228600072302  
0. 910358157772907  
-0. 513679698890710  
0. 684316076315613  
0. 140192304349516  
-4. 73329889425612  
-0. 226058789290396  
-1. 44744718200878  
-0. 407116078393543  
1. 22511257674024  
-1. 26537606440438  
-0. 474260967744089  
1. 34146471804873  
2. 996072766132888E-002  
-1. 78029128426063  
0. 775937997466771  
-0. 208811688323086  
-0. 528613824277802  
-8. 769136058458987E-002  
-0. 116809078076436  
1. 81240568208659  
-1. 57280445771667  
-0. 248035641556764  
2. 41856631939027  
0. 683833542231424  
0. 539202127844999  
2. 44264361658218  
0. 747665556633745  
-1. 18478560431747  
0. 278737633631079  
0. 336678800057428  
-1. 68911292809620

1. 28686818659780  
0. 334632195403173  
-0. 388708851348875  
-1. 38699303329326  
0. 859141259031589  
-0. 661085545360628  
-0. 580771598518557  
3. 13933081690384  
-1. 17790063047186  
-1. 49475155752894  
0. 573854433259798  
0. 178994654107743  
-0. 192568578021004  
-0. 503020522618067  
-2. 22587974160072  
0. 280003068346352  
0. 133994733857061  
-0. 445794779500666  
-0. 995809141463545  
1. 33516220211779  
1. 34173417852507  
9. 295377432146336E-002  
1. 49131008550827  
-1. 28911759233831  
0. 326114578537181  
-1. 91771802892363  
2. 553100007993837E-002  
-1. 62881925094748  
-3. 53292393296692  
1. 82949225543545  
1. 77160930393990  
0. 387192793284344  
1. 17234444073302  
0. 641938089230917  
-2. 40103784253562  
-1. 05902318613754  
-0. 565940399436523  
2. 36318603665367  
-0. 525954165131518  
2. 94713423412745  
-0. 148389508064317  
-2. 78506111320671  
1. 94243242243584  
-2. 18400852845194  
0. 124504408508293  
-0. 681329033967778

-1. 47217734045641  
-0. 711234516663105  
0. 931796802610256  
0. 978785293566601  
1. 96117242187056  
-9. 435408331401239E-003  
-0. 340995972948427  
0. 220317435938860  
-1. 03580256131551  
1. 59184690896137  
0. 541396334808294  
0. 868366786068895  
-0. 146338799904061  
1. 12222854362379  
0. 804884718343531  
0. 131557078964666  
-0. 893107725549554  
1. 53997347942576  
0. 324885645321873  
0. 445948901740199  
-0. 898506664013418  
-0. 494234029126404  
0. 530698277807247  
-2. 462947745779712E-002  
0. 183640732162709  
1. 61113861676870  
0. 303165725445964  
-1. 52167245772519  
-9. 412419861939299E-002  
6. 678849560077617E-002  
-1. 27368317119090  
1. 87781036055788  
-2. 19570626725843  
-0. 782517688656738  
0. 338913296219811  
2. 40374900236367  
0. 825271378378598  
0. 382128446840487  
0. 813303078038112  
1. 82778761919364  
0. 981053372198244  
0. 967768440229391  
0. 167973620941050  
0. 504753607504721  
-1. 37360059897565  
0. 193460628996668

-0. 332893028737164  
-3. 36878635052647  
-0. 110849936161923  
0. 449726940238379  
2. 164229764463076E-002  
2. 05399371795646  
-0. 780011108130403  
-0. 723134145844342  
0. 445646759156371  
-0. 479184737779241  
-0. 790476247914212  
-0. 837891680516667  
0. 397914629552644  
-0. 755823307196213  
0. 774409366567864  
-2. 09497324659982  
-1. 58012204023952  
0. 429257315919698  
0. 155356568574651  
-0. 384085728919092  
-1. 20887993590762  
-0. 910802813540805  
0. 657337833875355  
-1. 27639220495734  
-0. 332875523305805  
-1. 12950739272325  
-0. 520962415189162  
1. 49709853285682  
0. 929275426570499  
-0. 167042236944935  
-0. 588382955994144  
2. 08560611265497  
-1. 06512737627455  
-1. 43444396661896  
0. 710949109221071  
-0. 574449785167217  
0. 328862852818955  
-0. 833213037146320  
-0. 845949464750090  
-1. 10472791385606  
0. 312052855706384  
-0. 184604273700954  
-0. 534592184078877  
8. 558185851846070E-002  
-0. 609631803148891  
-1. 51583035473933

2. 00174412454595  
-0. 106380383090218  
0. 784543418721937  
0. 204715207292053  
0. 613300252351680  
0. 984735067160295  
-2. 63599838210719  
0. 297448539140306  
1. 87666428149681  
0. 618237273141471  
-0. 726026919615337  
0. 349503877476721  
1. 66152000351760  
-0. 530063512881728  
-0. 740521856974488  
2. 15215819541272  
1. 26838630165119  
1. 80529385922143  
0. 257327884287804  
1. 05071169263179  
-0. 817196818023407  
-0. 655490745581213  
-0. 585790754456907  
-0. 210262718165795  
-0. 412067566300330  
-0. 575667526552019  
1. 04026806881827  
1. 333356334378749E-002  
1. 59933983985087  
2. 21099368486912  
1. 92182793432605  
-0. 254445089400152  
-1. 11139491393567  
-3. 70356484363133  
-1. 55149879033489  
-2. 25440222141821  
-1. 95292351373473  
0. 415836136258750  
-2. 44629635738367  
-1. 00705573316129  
0. 392604520703757  
-1. 96090731978920  
1. 33053553377286  
0. 926866949610004  
0. 559929946545012  
-0. 605872437755367

0. 690862439757614  
1. 41834861084993  
0. 161098812639914  
-0. 535417485633767  
0. 161079892180515  
1. 78486367446808  
1. 14056128591568  
0. 180749466720325  
-0. 483417008528077  
1. 61874553476406  
-0. 303164308860954  
-6. 168822535794861E-002  
0. 354501508964972  
2. 70391820191977  
-1. 76431854308404  
-9. 550323442133538E-002  
-3. 05829270820689  
-2. 39719134082144  
1. 25480504414938  
-0. 235673455388130  
1. 11878152315232  
-1. 08965423303041  
2. 30598093432716  
-2. 24023552529182  
-1. 98949877537718  
1. 31125204056357  
2. 63912169910316  
-0. 751623228378537  
1. 63534982168088  
0. 954514108845090  
-1. 12593599700618  
0. 548490147540169  
1. 23746796829148  
-0. 711045244575878  
-5. 151415963813515E-002  
2. 80800793860546  
0. 399771558995542  
-2. 25471403894333  
1. 22624165587114  
2. 10724657588741  
-1. 85277941862064  
6. 37934487835939  
-0. 567550142128865  
6. 73511549923329  
-4. 89941115154812  
1. 78963665664823

2. 03878712023150  
6. 07586441521043  
7. 65529915313823  
-0. 948851727956377  
6. 53289165386392  
-4. 71131979150363  
1. 42753598841409  
-0. 262042779269640  
0. 128728402583649  
2. 17137216795521  
-6. 76649596211006  
0. 692202519203695  
7. 59424101420614  
-1. 89024840706258  
1. 17040749615324  
-0. 933638506374302  
0. 463517932823422  
2. 75114870479613  
-6. 64414717640712  
0. 428289421888573  
-1. 22555395278245  
2. 26789110660658  
1. 23263372564734  
0. 184857122976527  
-2. 43870100588070  
-0. 540351241374792  
-1. 05397050436128  
-1. 88084218256298  
2. 13701776173269  
0. 114266347852500  
-3. 33697664621941  
-1. 67455144635194  
1. 11666883624266  
-1. 50434356202918  
1. 13354903233641  
-1. 70731549231202  
1. 00007818579541  
0. 453466204732344  
0. 391030969152121  
-0. 555431096231149  
1. 58120797822146  
-0. 301518847317356  
1. 65241012598364  
3. 45030690594416  
8. 906699408410350E-002  
2. 34648188145144



1. 00583735387055  
-0. 489861203049659  
0. 995106119408991  
1. 83049774711409  
6. 524063702174025E-002  
0. 551199788790139  
-0. 135194743353105  
-2. 13114551288908  
-0. 736520370572086  
1. 09000390912495  
-5. 343482590298192E-002  
-0. 401707775159867  
-0. 294140581836251  
1. 62353012476944  
1. 52812411182380  
1. 08275052591080  
9. 957419478202104E-002  
0. 386317651904526  
-1. 30285674015407  
0. 349601810006058  
0. 566656693662141  
-0. 143639036390202  
-0. 959414010816126  
-7. 922818790950038E-002  
-0. 978734841859712  
-0. 858975579735647  
0. 717272879207958  
-0. 833877378676407  
0. 192659700941892  
0. 119185691578952  
-0. 625280725941673  
-8. 146207509522208E-002  
-0. 837974753916121  
0. 130579445449271  
-0. 747218771049659  
1. 22723506102058  
-0. 169429845060095  
-1. 34654585789214  
-0. 667267848221428  
1. 56551766289098  
1. 82735682026595  
-1. 03356906173169  
2. 98042626936419  
-1. 19496070415606  
0. 406384199869804  
-3. 16112966899264

-0. 908101210521101  
0. 155916756934201  
0. 116571131683542  
-4. 21350049250811  
-2. 73844454273566  
0. 412788006041436  
-4. 58608536902998  
0. 434037648228094  
-0. 857305405468153  
-1. 21409473620680  
-0. 391069113997472  
4. 78533673348412  
-0. 521516670516903  
1. 12716834957871  
-0. 469121180496026  
4. 27910355653137  
0. 290190849369445  
2. 22790095210331  
-1. 93953025997050  
-6. 26897759244703  
-6. 811901132840086E-002  
0. 304336496394889  
-0. 975657592893407  
0. 662878289961754  
0. 456422802405943  
-7. 463569182590758E-002  
-1. 76872125525640  
0. 576650936611827  
-7. 533070297121933E-002  
-0. 504925959688402  
0. 864812813063838  
-0. 240003761788598  
-1. 62090356022180  
-0. 322253971578724  
-1. 84523095525875  
-0. 339725853373069  
-0. 481772089954445  
-1. 54918421539519  
1. 778781781075461E-002  
0. 231869245198006  
-0. 507600020409262  
0. 690598488913050  
0. 906827450253621  
8. 167027095830948E-002  
1. 41074148798039  
2. 56060382716515

-1. 56307977595368  
1. 53129313733920  
-0. 108177647972815  
-1. 48507021467016  
0. 223526302478815  
1. 07061408805550  
  
0. 975963605344142  
-3. 331848850339386E-002  
3. 14869265460177  
0. 110852738211021  
0. 106510174098484  
2. 27851409722957  
1. 16262956765126  
-3. 04880607737798  
-1. 10660966415800  
-1. 35795736896974  
-1. 05387448750787  
2. 48437516421050  
-2. 29145129148958  
3. 07467828729260  
-1. 80147494922803  
0. 222788265094705  
-0. 203427268428487  
-1. 07606176563318  
1. 97902997102094  
0. 917759946202249  
0. 769499354320917  
-1. 00178093256337  
-1. 37035842622039  
-2. 28655872478005  
-3. 08705276453581  
-0. 774964788589064  
1. 92289817634592  
0. 973909086591244  
-1. 13213352805245  
0. 283833801823666  
2. 48316205944887  
7. 241156149802645E-003  
1. 41887615816419  
-1. 00272484453425  
-3. 76363175794038  
-7. 506939600784868E-002  
-3. 33784747876587  
-0. 609274400319566  
1. 29707728171565

2. 29493323094742  
6. 285456093913667E-003  
-4. 66238842619619  
-0. 403356909234416  
0. 377349010733630  
-8. 672236900281896E-002  
-0. 643837530075700  
1. 72205576636867  
0. 224307116093097  
-1. 52530983350893  
1. 86539806264118  
2. 44706508135472  
-0. 564127106558060  
-2. 54278218877500  
1. 47994821686701  
-2. 30233495810721  
-4. 29574854732840  
0. 383380070582979  
-2. 18935510617512  
-0. 670525784127375  
-1. 52529002124484  
  
-4. 94156878884834  
8. 90687088518017  
-1. 42056002166302  
2. 21029953113306  
-8. 97898114674776  
8. 54313705863916  
-2. 25335518497780  
5. 00499555492149  
6. 07811918813930  
1. 40510114763691  
2. 32908252703046  
-4. 96903602757809  
3. 93679593830307  
-5. 22139732496613  
7. 00376521614549  
-7. 57202722872670  
6. 44258792933050  
6. 81024759105686  
-2. 19690050813460  
-5. 58300678167035  
3. 92098319490973  
-4. 94901472212197  
6. 22838360005203  
-11. 2577399795474

-10. 9645274432977  
7. 05229295931928  
-5. 85851475484887  
-7. 65437404284629  
7. 35088004943097  
5. 46442091139555  
9. 16369770919770  
2. 21060784539872  
-5. 36278727768253  
5. 71108090634411  
-1. 25902097166668  
-6. 84141647070567  
-8. 71051995272344  
2. 07588325126455  
-3. 68443824485569  
6. 96405308090501  
-8. 14219924864321  
-7. 19152603850407  
2. 56373230047878  
8. 94408883562049  
3. 89093723521766  
-2. 89967826595131  
-2. 90792297671858  
-11. 4475382375262  
1. 41079515676073  
-7. 12389201945406  
4. 63917642863724  
-11. 2387683169260  
6. 21303618492920  
-4. 08574908408639  
-5. 21865695531126  
-17. 6057736771884  
-2. 63305226483481  
7. 13477781205653  
2. 60991749096892  
6. 52961542625031

8. 72991194594159

|                         |                    |
|-------------------------|--------------------|
| 0. 108348250000000      | 0. 928360640000000 |
| 0. 519467660000000      | 1. 264585680000000 |
| 5. 061300000000000E-004 | 0. 917910540000000 |
| 9. 816979999999999E-003 | 0. 296058650000000 |
| 0. 118545700000000      | 0. 533686450000000 |
| 1. 300000000000000E-007 | 0. 310949800000000 |
| 5. 940463000000000E-002 | 0. 709091330000000 |

|                         |                         |
|-------------------------|-------------------------|
| 1. 696200000000000E-004 | 0. 486565820000000      |
| 1. 698300000000000E-004 | 0. 272111400000000      |
| 9. 625400000000000E-004 | 0. 121795150000000      |
| 2. 831653000000000E-002 | 0. 225490190000000      |
| 0. 000000000000000E+000 | 0. 133533580000000      |
| 5. 618720000000000E-003 | 0. 211165370000000      |
| 5. 600000000000000E-006 | 0. 150655750000000      |
| 2. 096000000000000E-005 | 0. 101124060000000      |
| 2. 996000000000000E-005 | 0. 146962150000000      |
| 2. 000000000000000E-008 | 9. 189258000000000E-002 |
| 9. 000000000000000E-008 | 0. 217123540000000      |
| 1. 087000000000000E-005 | 0. 159609020000000      |
| 1. 278300000000000E-004 | 0. 216988040000000      |

-0. 312216000000000            3. 999428000000000

tansig    tansig  
 20 - 30 - 60 - 1  
 rmse=    6. 9933 meV

W200. txt

-0. 655379104721224  
 -0. 218204737497232  
 0. 202560992311796  
 -0. 806677437551616  
 0. 715328392718977  
 -0. 327389586586865  
 1. 34727605307245  
 -1. 26940332975125  
 0. 552168192626080  
 1. 12622037423850  
 -0. 425884105787430  
 -2. 376062695715183E-002  
 -0. 853039363129542  
 5. 124821060906194E-002  
 -0. 334988591018038  
 -0. 117302043919271  
 -0. 418461141350679  
 -0. 201644832497574  
 0. 800265627254012  
 -0. 131034304732843  
 -0. 464964550986307  
 0. 894050591622125  
 -0. 492456772779839  
 -1. 43685036911396

0. 821656364051092  
0. 684503615704302  
-1. 85518168890597  
0. 995748557934810  
-0. 841738931659487  
-1. 52894522344864  
-0. 637679555885597  
-6. 691080395008879E-002  
2. 57409812819588  
-0. 339834966514972  
-3. 102806874706469E-002  
-0. 141600748767968  
0. 362617745714611  
-0. 589854822001588  
0. 945163500596618  
0. 172443305583189  
-1. 792903355217507E-002  
-0. 315802565970600  
0. 153439687441639  
0. 948116529736790  
0. 378902008034428  
-0. 583705123875933  
-1. 35319459187293  
-0. 387611016095054  
0. 250742645264356  
-1. 23799944069883  
-1. 351919354348385E-002  
0. 175345328984578  
0. 815213896966527  
0. 591303427959457  
-0. 253867099681350  
-0. 107343404916312  
0. 147379144539640  
8. 691130028808200E-002  
-0. 689460933546670  
0. 250622927663643  
-6. 824731531096302E-002  
0. 370653260607838  
1. 998374399176538E-002  
0. 145916617831660  
0. 565289870254460  
-0. 847801165229225  
-6. 767858106867286E-002  
-0. 150813726934019  
-0. 133856556807891  
0. 116575864124756

-0. 407732353541053  
0. 337654545964414  
-5. 459866289470720E-002  
7. 928058965182895E-003  
-4. 249450087185520E-002  
7. 000414347765316E-002  
0. 158154763081386  
3. 570692812912694E-002  
0. 111563225164138  
3. 262849636629046E-002  
-0. 622242078436601  
0. 161233936007399  
0. 865234270441529  
0. 172539236355432  
-0. 784446053571593  
-1. 69899803644980  
-0. 326696818524494  
-0. 240980175637247  
4. 558376032298382E-002  
-1. 07139398789525  
0. 233280231314852  
0. 694196752835151  
0. 991496469391620  
-0. 286822524089396  
0. 372570570991512  
-0. 150795331349982  
-0. 315388823874046  
0. 200371902787282  
-0. 456983788933436  
-0. 206984974666920  
1. 08079882436215  
-0. 789442647489651  
-0. 364315878336835  
-1. 06846458283846  
0. 393192993524105  
0. 393803255672123  
4. 522880277145400E-003  
-1. 10843691995376  
9. 964409072780467E-002  
0. 457458790167138  
-0. 187148606578539  
-0. 136226042703591  
-0. 132053376254450  
0. 275811151517404  
-0. 175299688695305  
0. 125774346540337



6. 687026621816670E-002  
0. 117001228790379  
0. 750636575368732  
5. 279626534219305E-002  
0. 378983778158662  
0. 502516575000769  
-0. 486462548111805  
0. 547733898141572  
-0. 961582147040654  
-0. 576124599033833  
-0. 136155341094412  
-0. 621552731294592  
-0. 738654753001698  
-0. 162295847398864  
0. 493187196446452  
0. 917272289126693  
-0. 100656568269884  
-0. 199949972000405  
0. 397968350986242  
2. 930026779936435E-002  
-0. 239961990785481  
-0. 174465761285914  
0. 655548823175768  
-7. 243445199336240E-002  
-1. 63080261701401  
-0. 221061632688988  
-1. 29544764419242  
-0. 182062373497146  
0. 447525501089316  
-2. 894272505822590E-003  
0. 330794771452426  
1. 47123231792370  
-0. 501583804772246  
4. 062486623821903E-002  
-0. 332659264332621  
2. 468373510157879E-002  
0. 286329441857976  
-0. 677871821045031  
0. 101403116815046  
0. 213957868145250  
0. 344981868222338  
0. 511750083491909  
0. 317254410265589  
0. 124641500697330  
-0. 346840609944860  
-0. 107063124953198

1. 36174681968082  
1. 45241682695502  
0. 487907373429255  
-0. 498622426245185  
-1. 57605177218105  
0. 391645421591123  
0. 186405256412176  
-1. 35971821541241  
-0. 163818489399809  
-3. 659709211028598E-002  
0. 728100383374169  
0. 512113123323445  
0. 246857289283792  
5. 989718989600152E-002  
-4. 114534022707341E-002  
2. 265154056177641E-002  
-0. 861446509354946  
3. 911497319087558E-002  
-0. 334458406159550  
0. 195678791184010  
0. 763567101896868  
0. 165750918939287  
0. 359346415868137  
-1. 19537932022272  
-0. 547891012623932  
-0. 294958789265085  
-0. 154482375987027  
2. 450085117345432E-002  
-5. 533945598705160E-002  
0. 463894545021211  
0. 148931064265334  
0. 264964435827992  
-2. 506860716531002E-002  
0. 122917573835091  
-0. 230770916118867  
0. 205602267537361  
-1. 497225544721530E-002  
-0. 233196512024218  
-1. 26321439843501  
-0. 526023363567010  
-0. 146624479974130  
1. 01066496736827  
-0. 162824926388463  
0. 531216816506187  
0. 339368798278380  
0. 413569376518137

3. 798346721571660E-002  
-0. 725548025707092  
6. 306343601129424E-002  
-0. 229090842338288  
0. 258640970439928  
6. 286796275012282E-002  
-3. 532936660570207E-002  
-6. 833004026953113E-002  
1. 890291074856073E-002  
-0. 179586505089211  
-0. 357596437376288  
8. 188700244418436E-002  
-1. 61079791962966  
0. 514370142671503  
1. 06740090889903  
1. 76767480260555  
-0. 359574290401631  
1. 71800798399644  
0. 414979110121794  
-0. 520723968729268  
-0. 980418424466263  
-0. 559707030809269  
0. 113570837602489  
-1. 01854423968516  
-0. 313317214198976  
-0. 273959669114719  
0. 396167555044086  
-0. 121035125520434  
0. 281673436596186  
-8. 964570483148553E-002  
2. 955093201960129E-002  
-0. 657574418544406  
0. 116101232193104  
-0. 329735158140354  
5. 981414465776091E-002  
-0. 872841461170270  
0. 757600547633606  
-1. 03226261470795  
-0. 381718079719378  
-0. 132427001162634  
0. 119464325204804  
0. 820608648048479  
-0. 461051606871219  
0. 413697398240673  
5. 215973080621755E-002  
-0. 193573169769573

-0.146311531704466  
-0.209158411900433  
-0.168519351413234  
0.344953216801979  
0.392950825349577  
-7.876663950897790E-002  
-0.921365951138683  
1.96691578054736  
3.06217646191647  
0.739213046262973  
-1.00735170876697  
-1.81451809239089  
-1.38336496573361  
-1.48082742184974  
1.15831718390418  
-0.232804370767048  
0.664637304741135  
0.687097775661138  
-0.933991640717338  
1.18901811313886  
-1.10899120598885  
0.157416874486786  
0.198555047721228  
-1.38915242917694  
1.69110462890835  
-0.272943494180996  
1.37075046284980  
-1.59462548468342  
-1.15633709558484  
-1.13333363458265  
0.399498746354066  
1.89032998460632  
0.589054316429738  
-2.56249353345127  
0.881823742871705  
-0.166491187040838  
0.322890256765397  
-0.662905331421900  
6.435503663723789E-002  
1.39438225240784  
-1.27465373476728  
-0.137374575591864  
1.12740727498490  
1.860932850810029E-002  
1.01306212733301  
0.463106685602039

-0. 541142254736344  
0. 443194243481441  
0. 215249929991970  
-0. 428196151557669  
-0. 477182866326589  
-1. 06726663967310  
0. 929719827213697  
-0. 205610650236941  
9. 364608151414058E-002  
0. 726308918163097  
0. 300579063601014  
0. 474490621680511  
-0. 637972047720858  
-0. 296108554884915  
-0. 258984755643462  
0. 178983157033484  
5. 306626589589410E-002  
6. 820003811729412E-002  
0. 616043711780464  
-0. 141844563964945  
1. 12299373448761  
-0. 856616718020565  
-0. 323745134315782  
-9. 705109369807781E-002  
0. 849125798805835  
0. 416458186092065  
-1. 70608318636523  
-0. 421296329240660  
-0. 277309714565821  
-0. 779730575747208  
-0. 146626558054372  
-5. 940119365722462E-002  
0. 907770224779334  
0. 631318971685934  
1. 366572270304728E-003  
1. 263366747033519E-002  
4. 676422111317209E-002  
0. 113447373780336  
-0. 273552201119381  
0. 278274123583885  
-0. 511570452062046  
0. 452420893269563  
-1. 983699044793799E-002  
-0. 102473073916933  
-1. 06666211069729  
-1. 43434215302769

0. 807893977828208  
0. 476101205368210  
0. 628634455847003  
0. 597446218776841  
0. 194871393420322  
0. 771648455975288  
-0. 584074675397953  
-0. 671571566346648  
-0. 225787191046378  
-0. 231666331463922  
-6. 468031447995796E-002  
0. 242961748368466  
0. 512111040542423  
-0. 215556899229679  
-7. 501654772967840E-002  
-1. 07924874280439  
0. 939481009546802  
-0. 274452615007073  
0. 695803749940785  
0. 339313286915163  
0. 653568331873023  
0. 367417304446079  
0. 114089491827002  
-0. 211380159946880  
-0. 311914477052711  
0. 206193421343736  
6. 887946571737262E-002  
0. 257667542219676  
0. 303612641688024  
0. 206459067757548  
-0. 201226076265733  
3. 026650542815409E-002  
-1. 37803707707810  
5. 240232800142434E-002  
-1. 07805131768261  
-0. 710486842371305  
-1. 55853790033823  
0. 970121415165151  
2. 02082099195945  
1. 84254612295783  
-0. 559740477282256  
0. 842074773727338  
-0. 872496192822316  
-1. 00837511019056  
-1. 02332965617908  
-0. 730155491523579

0. 919017675810075  
-3. 714192769183974E-002  
0. 362951535112896  
7. 835952840245186E-002  
0. 349898460089288  
-0. 422900877499620  
-0. 829562078652450  
0. 357272299462830  
-1. 77220890482381  
2. 03520779057722  
-1. 16492573588503  
0. 932789175940525  
-1. 32186134420201  
0. 671794273128285  
-1. 28834570114241  
2. 32860960246894  
-0. 704580823578755  
-0. 419733576970233  
0. 505705666458825  
-3. 033166920476031E-002  
0. 669332950358718  
-0. 831185277264267  
0. 501138030600025  
0. 208453730542274  
-0. 248383358568076  
-4. 133047870257058E-002  
-0. 580050860311927  
0. 158142838144653  
-1. 12495751917038  
-0. 772165845611857  
5. 270116831151666E-002  
0. 826582665841994  
7. 478333792852269E-002  
-0. 825541674041853  
0. 671940711487469  
-0. 177053831991762  
0. 480601321877927  
-0. 427821467502293  
2. 303304653505543E-002  
3. 324976428228274E-002  
-0. 235114134115846  
-6. 638498598110083E-002  
-0. 236288950886945  
-9. 857478901917693E-002  
-6. 136332087186884E-002  
0. 122106665623892

0. 202717085034058  
-0. 131478696703107  
-0. 243231202334506  
-0. 648407857667699  
0. 141768159132186  
0. 750218570554263  
-0. 120272813688856  
0. 571967594218360  
1. 40934865766223  
-0. 875034008962487  
0. 590780130647670  
0. 314122154320419  
0. 101790206755219  
-3. 402539815766022E-002  
-1. 01165323752739  
0. 151118150924004  
-0. 458410727273703  
-0. 147634217560165  
0. 896022263298516  
-0. 354687361252832  
0. 467955151249958  
-3. 317545274031453E-002  
1. 03992006213367  
0. 175852447979724  
-0. 518048757236119  
-0. 174168765724965  
-0. 216280587057296  
-0. 896347695430084  
-4. 601679326876366E-002  
-0. 876658806006438  
-0. 398624782868403  
0. 105548096973128  
3. 218155195489986E-002  
0. 673304152983692  
-0. 422138927668634  
9. 325964377960318E-002  
0. 211976261806747  
-0. 157458497070527  
2. 136258230122012E-002  
-0. 232464712561319  
0. 688585175244965  
-0. 173021611861435  
1. 36624520112250  
-0. 915496101430638  
-1. 67623240065305  
-1. 92295802643089



2. 50217790988259  
2. 14992624424979  
-0. 241138605950103  
-0. 477716269353176  
1. 929006420090788E-003  
1. 07059398065538  
-1. 27442565857660  
-1. 07514313737806  
7. 460852735028735E-002  
-0. 373733148685468  
-1. 06877928610210  
0. 207560537332515  
-0. 366763131181419  
-0. 862509259191862  
1. 86723635792391  
0. 559525857792600  
-0. 763469837618951  
0. 695493896921491  
8. 149116535835095E-002  
0. 996311491532495  
-0. 493363910533028  
1. 21444491279790  
9. 067014114045434E-002  
0. 858510293617293  
-0. 633309357091173  
-0. 368334078849914  
-1. 859231407678897E-002  
-0. 409915085654127  
-6. 415708159621737E-002  
-1. 02709004750038  
0. 508605384306360  
0. 172779128251941  
-0. 395192848060507  
-3. 750849609355020E-002  
-8. 062369781712726E-003  
-0. 279251574780974  
1. 10227532848334  
-0. 409079168281063  
-1. 20973133702671  
-1. 63433204448292  
-5. 265993084957481E-003  
-0. 124977388577858  
0. 227519074225541  
1. 06932999364840  
0. 391972278612715  
0. 617775422863118

-3. 696383220442131E-002  
-0. 259788971239070  
0. 171265894618632  
0. 278076733668858  
-7. 105660476619369E-002  
7. 625844978227521E-002  
0. 308990650300473  
-1. 21572798020139  
-0. 580935199775835  
0. 297796917179914  
3. 19508081781226  
0. 416720776450388  
-2. 64890170228008  
-0. 260130834793951  
-0. 234945373617817  
1. 62723752811146  
-3. 75139283133587  
-2. 53375224351021  
2. 53841805738557  
-0. 753044364022438  
0. 968709623785767  
-0. 724513879390349  
0. 958542082384470  
-0. 274583919902909  
-2. 01928376394029  
-0. 235641701951165  
-0. 102726565867357  
-2. 348699497264673E-002  
3. 20320337351304  
0. 357887364824478  
-0. 481097238108580  
-6. 211033634927748E-002  
0. 847690796689502  
-9. 192656141691498E-002  
1. 816886984543576E-003  
-0. 733574918655607  
-9. 224320634053383E-002  
-0. 271284141123946  
-1. 010061637949451E-002  
0. 204531712895476  
0. 215361116162180  
0. 339367434455886  
-6. 334921689882567E-002  
-0. 234909011068229  
-0. 138814820742414  
0. 194078465631826

-6. 073919995296928E-002  
-9. 491837062213049E-002  
0. 696159754233717  
-0. 296135258174191  
-2. 67394652212244  
0. 579376964121310  
-0. 809929623458796  
1. 12796826528014  
5. 572935757941297E-002  
-0. 224763887067899  
-0. 336963955611214  
1. 65189429960052  
0. 300467440891643  
-0. 715078810673996  
-0. 156164022299055  
0. 555425633043620  
0. 531395343037923  
-1. 06787427128156  
-0. 336166079991967  
0. 331912385782098  
0. 214031419018774  
-0. 302118815781643  
0. 347258020992453  
4. 106064064832145E-002  
  
-1. 53280805469256  
-1. 66810623730187  
-1. 06798227802167  
-0. 572024507502906  
-2. 55600740269028  
-0. 185242919329393  
-0. 903961634247469  
1. 21589345087218  
-0. 897343345536936  
-7. 218476571983123E-002  
0. 827874756772734  
0. 757288677762732  
-0. 488026530755956  
-1. 56279633620362  
1. 61656072307356  
5. 330274721651330E-002  
-0. 445117933114273  
0. 104176943055666  
1. 28851123499111  
0. 978533259945680  
-1. 03133878599235

0. 769535387296966  
1. 98745046302615  
-5. 859959589393042E-002  
-0. 560386759170583  
-0. 700530257272335  
-1. 51094949252287  
-1. 10201320136262  
-0. 329263154248738  
1. 24517762910645  
  
-3. 88368525077144  
2. 49796055343286  
-0. 200664309101820  
2. 36429621030393  
0. 303445997788715  
-0. 527789472934391  
-0. 275794601263841  
0. 604016427137408  
0. 143948319018264  
0. 663123732467720  
-2. 65951582659294  
0. 115515819863326  
0. 332033761633431  
0. 755592768898266  
0. 621661807084439  
-4. 09251554102702  
0. 328735380971553  
-0. 565068489505555  
-1. 92827917926937  
0. 254519598737561  
0. 759088728247760  
0. 306539128426348  
1. 23383310444128  
1. 65904376707411  
-1. 41591256410697  
-0. 971148210402694  
-0. 601469990322960  
-0. 242875056667707  
1. 89841168832014  
1. 10989792166139  
0. 406164364035368  
-1. 33941767044273  
-0. 783311782461634  
-1. 37639497409996  
-0. 532946364293454  
-1. 91557690007125

0. 638927983541056  
-0. 341784003178607  
-1. 41049136887779  
-0. 323307482959504  
-1. 67179758775398  
-0. 914860876269737  
-0. 963944765474026  
1. 65788012140669  
0. 935082138675779  
-0. 979506200354827  
1. 02763552773314  
0. 860370969538940  
-2. 58190342294737  
1. 20273133585226  
-1. 38324043830717  
0. 178624059470276  
0. 101778689172371  
-0. 988407680859868  
7. 664219199837127E-002  
-0. 818415745572100  
1. 90519732688585  
-1. 18157921286485  
1. 26080954661855  
0. 430223963596940  
0. 642179089753817  
-0. 945447500375042  
1. 60776128336727  
0. 639292743431280  
-7. 374737169945247E-002  
1. 10823583298268  
0. 345308108661127  
9. 220618465916901E-002  
-1. 29841708563219  
0. 510288041248233  
3. 69318749950240  
4. 205461462803946E-002  
-1. 04429020140581  
-0. 883511447197829  
-1. 07904536466520  
0. 584722481473029  
-1. 48600545402999  
0. 581073855426402  
0. 899386952916374  
-0. 601068577786164  
0. 417515640964021  
-1. 57242954663912

-7. 343842180746386E-002  
-0. 109312125010076  
8. 526394225607120E-002  
1. 22642674088373  
0. 837344653949271  
0. 747851307800679  
0. 661278471539879  
-1. 32724194476450  
-1. 63276090379396  
0. 693231262533221  
1. 61736682623537  
-2. 12553025054826  
-5. 485630979972320E-002  
-2. 20013211380018  
0. 586984216687871  
-1. 59218705248845  
-3. 17578513664043  
-2. 34915169795931  
2. 77315629820092  
1. 94020292993936  
2. 12259750586869  
-0. 243380302944871  
-1. 95848815209880  
-1. 37489418730851  
-2. 52995444126996  
-2. 38065346974148  
0. 428109713907539  
1. 04039525631444  
-1. 37418840160667  
-4. 40014712821729  
-3. 21689225504792  
-2. 08335482834022  
2. 07370105651830  
0. 536831904976472  
0. 714829679971618  
1. 58701635993260  
-0. 522431719485068  
0. 390151209194322  
-1. 16237697887335  
-0. 774078784420140  
9. 744299297658642E-002  
0. 698906012669463  
1. 07067165713946  
-0. 655022412073965  
-0. 290477520780196  
-1. 07734630608328

9. 967887268961199E-002  
0. 128461238216658  
0. 985691517485885  
-1. 27233091766039  
0. 723508651495324  
-0. 772357550671415  
-0. 358752681965897  
0. 466930346518000  
4. 055479562358086E-002  
-7. 548290681999030E-002  
-0. 470076632239196  
-0. 383197718280902  
-1. 25518252306278  
-0. 738739501459738  
-0. 708731947213149  
1. 06015329697400  
-0. 985770795731087  
0. 935052475590995  
-0. 739062478814168  
0. 245184367153929  
-0. 545728334040851  
0. 247605157578270  
-1. 72626803121978  
0. 371137659029475  
0. 258898681131056  
1. 36237140680089  
2. 17595370243214  
0. 475287522884355  
-1. 71706615483430  
-0. 800818124171136  
-0. 444863737506846  
0. 711842838659908  
2. 08100999586718  
3. 12820016515119  
0. 570798755869061  
-0. 143991091389090  
-1. 00753649164856  
-0. 236622738666436  
-0. 120460841398505  
-1. 35139060662638  
0. 590950597620076  
-0. 685101384000372  
1. 01286294163695  
-0. 499595337245180  
-0. 246838156572698  
-0. 212740814917370

0. 799701194116972  
1. 49285933126169  
1. 58414759812000  
1. 20701798578483  
-1. 76287152600751  
0. 391611834847507  
0. 754185195052797  
-1. 32197966065446  
-0. 237308165106912  
-2. 26273569944973  
1. 21076430142370  
-1. 09294888973121  
1. 00573810645506  
-6. 985315834772915E-003  
-2. 26517871880331  
0. 859791909459297  
-1. 40260526643496  
2. 40572558362956  
6. 217043438832929E-003  
-1. 56401021487979  
-0. 895176601406390  
-1. 30013943416841  
1. 21363354975478  
-1. 23095313109066  
0. 269195992202371  
-3. 83445145699947  
-0. 578563995569199  
2. 48424578954511  
-0. 442252359742975  
-1. 08010630387150  
1. 50835336607702  
0. 419595371462021  
-4. 021458000211108E-002  
4. 811648331534820E-002  
-1. 25757463869871  
-0. 241914453651394  
-1. 08110515817544  
-0. 749921614429050  
-0. 818878659691532  
3. 09546187892410  
0. 116783258731446  
0. 853061483927290  
1. 41681053016164  
-0. 522228087402110  
-0. 152050603240430  
-0. 932341522930605



3. 586985467078916E-002  
-0. 917300316978229  
0. 645160284206690  
0. 675979225378014  
0. 518232560444644  
-0. 364665000382674  
-0. 162197418678162  
-0. 111603233533637  
0. 986805953935843  
-1. 58338694119652  
3. 25585860339599  
1. 08058492230203  
0. 416160430963311  
3. 887090011342595E-004  
-0. 396405090495150  
-2. 37743734529542  
0. 887499074705160  
3. 913573096772418E-002  
-7. 833548528210767E-002  
2. 11185859960790  
-2. 21531172495142  
-0. 619106554573772  
0. 742785726456878  
-1. 26415027568952  
0. 756352824870919  
0. 437728290363875  
1. 13752886058643  
0. 710804862357373  
-1. 64466256362985  
0. 186245731092863  
2. 67735857413256  
-0. 866491896884028  
-1. 38217302651086  
-0. 246307760261167  
-1. 40578074525572  
-0. 866586604248990  
-1. 27212789070432  
-1. 067484761489291E-002  
-1. 03965906860108  
0. 322160908607744  
3. 83180087757335  
-0. 156857793973148  
-0. 155949058849477  
-0. 645423468626716  
0. 550903636216732  
-0. 112688681756325

-0. 407887901387998  
1. 294401390264197E-002  
1. 648432601638319E-002  
-0. 326856822505988  
5. 48390264809843  
-1. 39154204570933  
-1. 16648600266219  
-1. 95914015799788  
-2. 03982969396218  
1. 64121474638662  
3. 42612534710314  
-0. 150861401283328  
1. 91296879589741  
0. 534850134421468  
-0. 644648541952370  
-5. 03324968102926  
0. 636116477677676  
-1. 60452369134501  
1. 62625381714883  
3. 07615485925650  
0. 303869662538738  
-0. 217060539001221  
0. 847399904841917  
-1. 62045486804437  
-0. 977248442971035  
2. 65727061334670  
-0. 912230269380590  
-0. 170164558755638  
-0. 918059695846353  
-0. 465680461952480  
-3. 72797023118518  
-1. 90509344204158  
-1. 62250798481899  
0. 837905442979652  
1. 56077436943574  
-0. 122709080504161  
3. 660957377887981E-002  
-0. 175634375393687  
-1. 45308221157647  
1. 50369917853088  
0. 145100245783917  
-0. 769516916383033  
1. 03235770537693  
-6. 696034939400319E-002  
1. 11675215726294  
-0. 240658462939850

-2. 07876989678008  
0. 147350586612751  
2. 21461239257121  
3. 10342069316252  
0. 707025789971086  
1. 46450971127059  
1. 51741591080458  
0. 605968484257963  
0. 111666984795613  
-0. 205534928101440  
-2. 87432786223370  
1. 24054143491067  
-0. 963192182193815  
-0. 215266677625741  
-0. 920300667445587  
-1. 11009264260048  
0. 505045777506101  
-0. 359273440795004  
-4. 51165121147899  
-2. 059218418850010E-002  
1. 85630343271167  
-0. 105992663713027  
4. 48877015131585  
-1. 97431258563633  
0. 782587022790561  
-0. 573911582501243  
-4. 50956686518853  
1. 85688223188679  
2. 69873383847375  
2. 07505109338308  
0. 119789968457770  
5. 424510041142528E-002  
-1. 24274930976617  
-0. 236162854985552  
-1. 43238442604369  
-1. 93253503226081  
3. 00567955232799  
-2. 39201030819121  
-0. 196726563037579  
1. 16387207991177  
-5. 81798055316273  
-3. 45821736613938  
0. 509060656978839  
1. 85823783090743  
1. 14198081900786  
2. 92927354510331

-1. 85038646772631  
-1. 38289215414372  
-3. 14333404948177  
-0. 218821101956845  
0. 835956561741420  
-2. 18293616366555  
0. 879585824921225  
0. 600021188205635  
-1. 22627390165897  
-0. 454881894355002  
-0. 454400322137189  
0. 864573806421822  
0. 589544810602204  
1. 89217539860236  
-1. 24545227249624  
0. 666376879800056  
-0. 176344961751094  
0. 263779054680954  
-1. 63794902277890  
2. 971962357438656E-002  
-2. 82662873842890  
2. 71864216991932  
-1. 38272163778742  
-1. 76918212329672  
-1. 92729257121619  
-0. 578566148264572  
1. 18982917841757  
0. 810229306231172  
2. 46904788591347  
6. 273422943215529E-002  
-1. 09187357296025  
-0. 597429557492988  
-0. 945256696544730  
1. 12670850915218  
0. 139343482080814  
0. 168695237915180  
0. 473061339188719  
1. 74330505315162  
-0. 263195678546684  
0. 848299180962920  
1. 21413516776968  
1. 07781242983234  
-2. 88304355653526  
0. 321865173136907  
-1. 14835335003090  
0. 314719350050062

0. 969198174238915  
-1. 16196190486634  
-0. 479950042303161  
1. 74580022998822  
9. 217846342169399E-002  
1. 79465957801864  
-0. 716138378090919  
0. 785682588866104  
0. 203497996985486  
0. 758234605185341  
0. 480737390312810  
-0. 638384114134919  
-0. 259621995970771  
-5. 697387932797970E-002  
0. 335433860997400  
-0. 193870366177345  
0. 907963501361967  
-1. 67962944581203  
2. 087921003250474E-002  
1. 55375202808571  
-0. 559240370248844  
0. 112463134063463  
-0. 249493714983761  
-1. 42054160667208  
-1. 81763973194520  
-9. 911229244718582E-002  
1. 48060251456937  
-0. 885208004047276  
0. 710501384864815  
5. 145074122911591E-002  
0. 287983333979632  
-1. 19432035405554  
-0. 490246550263612  
-0. 900028793107613  
-9. 238811542515823E-002  
-1. 47465998808971  
1. 01437055762455  
-1. 01433408842428  
-0. 967168134839426  
-6. 742859871049557E-002  
-3. 203606457124915E-002  
0. 877033659909262  
-1. 55576213948964  
-0. 109741159665219  
0. 553838550685598  
1. 05198907074475

-1.48566203507502  
-0.395376651641708  
-0.243735147200565  
-1.03510713218928  
0.651848460742517  
-1.68940420264244  
1.67762953712150  
-0.781703563844842  
0.287895306272190  
-0.820663929652895  
-0.574010781309973  
-0.569568974238225  
-0.494460714896374  
-0.786864802639426  
0.138227793862838  
1.57358687178244  
0.845099051888413  
0.773862262564643  
-0.219680571617112  
0.250533323182091  
-1.60099743527751  
0.831381314675406  
-1.06682875812025  
-0.604913097112751  
-0.657863602649506  
-0.516195400967592  
1.57633588757199  
-0.540450440334844  
0.433741875910103  
0.559691708568656  
3.68715920415683  
-1.51767369415963  
0.865079762838622  
-2.52802485255062  
-0.157749284384841  
1.76559987223402  
-1.10522886889724  
-0.700493080559063  
-0.936458597721202  
1.07725450022200  
-0.526028984859882  
-0.261352978931332  
-0.880445387217285  
-0.127996611350185  
0.943930950919832  
1.08751231111288

-0.942596707719162  
-0.532204107177401  
0.784648202594363  
1.04569303332362  
-0.123341106379223  
0.279422394002478  
-1.37560650663987  
-1.50832465051468  
0.244362049399142  
1.63644280786678  
0.793016252803581  
-0.359738740980570  
-0.990893766723719  
-0.693637267868401  
0.721530382511443  
0.372603981129401  
-0.378692833563065  
-1.38807048275666  
-0.890212130866845  
-0.482661372162396  
0.753301190244658  
1.09222150643355  
-0.581920472484163  
-0.283641629256471  
-1.40272533232668  
0.491477007853054  
-0.984780309356159  
-0.866226902462108  
0.346037490764860  
-1.01118021713049  
0.363705667533435  
0.889927297783048  
0.442041614671709  
0.105680777840197  
5.477289308511078E-002  
0.639412426343677  
1.04150102890036  
-0.187955692729725  
0.886550530041365  
-1.57618551137458  
-0.611348959982007  
8.763539548904348E-002  
1.26518324075350  
-0.284820224743254  
0.339892375992413  
0.970345856336281

-0. 978970831547020  
-2. 07023608016481  
1. 22575809872568  
0. 333573603348747  
0. 262600801831544  
-0. 193971732976198  
-0. 145663376674432  
0. 977507963267068  
-0. 149053943333418  
1. 34939800911312  
0. 838632275210633  
-0. 110554520319502  
-0. 484732429918528  
-0. 792195268084261  
-4. 531283358053274E-002  
-0. 718837956589860  
0. 640867752975373  
0. 865216386309066  
0. 181447673717475  
0. 354360060135028  
1. 76762082425402  
-0. 659604036119601  
0. 433108891646555  
-0. 381125123752570  
2. 23871838411151  
0. 603269679300867  
5. 042882237050680E-002  
0. 365457257003306  
0. 188227192618364  
-0. 290364980451154  
-0. 411496032184611  
-2. 98635097085268  
-0. 590835494707631  
0. 717465043322954  
2. 24837729228720  
-1. 25894759789635  
9. 829433195875396E-002  
6. 777822009036755E-002  
0. 892653072016966  
-1. 46879964123547  
0. 237763607633362  
-1. 35872242015317  
0. 257713308467013  
1. 25811520216207  
-0. 316592933611294  
-0. 774636994221580



-0. 639906123313911  
-1. 39872327644574  
0. 167190338017451  
0. 214017369527739  
-0. 330835566489094  
0. 191185174628324  
-0. 146123818465752  
-1. 38111780766305  
-2. 00831255301389  
-0. 949581952363303  
0. 253428145831969  
1. 47695912335349  
1. 72065796484596  
-0. 198842438405747  
1. 40238717325763  
6. 912892803918620E-002  
-0. 246227581194755  
0. 906283535869166  
-0. 945174224512451  
-1. 06509530270240  
-0. 394994623887108  
1. 43749430117425  
-1. 02519668239546  
-0. 657303210265197  
-0. 136771317822411  
0. 655911515952436  
0. 639098922724227  
-1. 38724511106415  
-1. 23139686954214  
-0. 234395162459628  
-0. 306273337951558  
-0. 145636974762625  
-2. 92266801679707  
-0. 925179304295320  
-1. 96511007999367  
-0. 286884711415067  
-1. 10742291775352  
1. 23745193771198  
0. 483956358570495  
-0. 326169934578983  
-0. 175385715746927  
0. 358286336842299  
4. 94562241669498  
-0. 775236685445420  
0. 377641240753898  
-0. 413789412976298

-2. 58630307032222  
1. 63672523207342  
-1. 258130501109802E-002  
0. 264548307992694  
-0. 230022905097096  
-3. 951677252692680E-002  
-0. 325934163640407  
0. 151935975685747  
-1. 18750019879208  
-0. 140839694101440  
1. 40557971695921  
0. 503771360831261  
0. 568776095509370  
0. 356028531505333  
0. 949190818005124  
0. 592619366915373  
-1. 06539995891673  
-0. 368819844465090  
-1. 02468297159482  
0. 824308077279503  
0. 210157414396535  
0. 212668645952320  
-1. 30776970673703  
-0. 742371612336275  
1. 28028296749366  
-0. 302212113789145  
-2. 26911456640016  
-0. 259916576226018  
0. 316048714149077  
-0. 583406525585557  
1. 57194747996600  
-3. 92584783840921  
0. 582964667585151  
1. 02948592840879  
-0. 660983411724149  
-1. 41777586164492  
-0. 568689994987107  
-0. 666581169048144  
0. 782138679279460  
0. 408861045629916  
-1. 36551084545876  
-0. 953339789689281  
0. 473514404668948  
-1. 48304595326390  
0. 762381038272190  
2. 425054436347186E-002

0. 652398146272239  
1. 03556311794178  
1. 05297175563625  
-0. 919252897849933  
0. 273522130525428  
-0. 443559738468900  
1. 00604099615099  
5. 370708690037290E-002  
-0. 143734387811689  
-0. 121550262801195  
-2. 90942045683067  
1. 91345902369039  
-1. 98698229377462  
5. 19750670920564  
-0. 888494459203946  
-1. 01197492414041  
1. 61943111645902  
1. 66130491446387  
4. 19949743783092  
-0. 554126393586062  
-1. 36675406032914  
-3. 32526471408507  
0. 634845657425417  
0. 778984721916818  
0. 897466209030701  
-0. 520286665600031  
1. 29653140822762  
2. 18021144486197  
1. 89716331430458  
-0. 616437431189900  
-0. 108678334370984  
2. 74656327597593  
0. 934459757748848  
2. 24942267837967  
-1. 99088699535905  
-2. 53785804312144  
-3. 08369779277131  
-0. 577056508874895  
2. 41943041987394  
0. 868906321485911  
-2. 24212224212255  
1. 05527416711535  
-2. 550087498874536E-002  
1. 37852112545170  
2. 554932595933158E-002  
-0. 974997021256872

-3. 944087030866263E-002  
0. 596610960461529  
1. 28750802096116  
-0. 126132719467729  
-0. 695269367156456  
-0. 303316170883626  
-0. 786755490166010  
-1. 640096780297089E-002  
0. 316133274152563  
-6. 188508562443212E-002  
1. 33481138654649  
1. 66444954463475  
0. 275575532493925  
1. 03234938893149  
-2. 02045751994076  
0. 622482012722106  
-1. 02536003238552  
-1. 945368124007443E-002  
-0. 246943180238316  
0. 232966886691929  
-0. 265166777439268  
0. 303952809602298  
0. 593843229892991  
-0. 708294127416353  
-0. 334131073126522  
-0. 233188682682784  
-0. 881898896298792  
-0. 151013389047888  
3. 634407562932950E-002  
0. 929325283298850  
1. 59958576949351  
0. 350515065598011  
1. 54601912590069  
1. 38464689863338  
0. 660888813843004  
-1. 79595889755445  
-2. 18269628894532  
7. 957631686720346E-002  
1. 00441725919639  
1. 67723812713421  
0. 186830520600356  
1. 42976075556009  
2. 741592734656113E-002  
0. 448710027679072  
-0. 959403013391348  
1. 00770745062957

-0. 835202575742995  
2. 822935977224190E-004  
-1. 23959345061136  
-1. 35303598116039  
0. 923107408581781  
-1. 07912228541915  
0. 249500779037734  
0. 158920821811110  
1. 60452135202661  
-3. 28390633010850  
1. 009732638299334E-002  
-3. 30662384860367  
0. 307355657296204  
-1. 14636516734320  
0. 673456606467675  
-1. 99945824790731  
-0. 561095910543999  
-0. 430723073350518  
-0. 997116700572667  
0. 394520519538715  
1. 52510863512281  
-0. 860553722015655  
-0. 163219823135817  
2. 42212397425594  
-0. 681030060024477  
0. 514562501222412  
0. 563562336439822  
-0. 210569667644763  
0. 233686680895781  
0. 846985465312758  
-1. 64152371957900  
-2. 47594427951712  
1. 31204534820337  
-0. 658239126913459  
2. 43311713416268  
0. 442676467756162  
-2. 11576204113391  
1. 20982419763496  
2. 90726157457010  
-1. 17052035068361  
-0. 993378904305233  
-0. 254515505412483  
-6. 932813901317356E-002  
-0. 149437396223306  
-1. 47299547224842  
-2. 16988075830489

-6. 820905976885598E-002  
-1. 69969974877184  
-2. 25692314626296  
-0. 994716468980081  
2. 97489229887956  
-1. 279949184934923E-002  
0. 445070039558291  
2. 79830256686397  
3. 25524708907064  
-1. 12465114742262  
-2. 29112192402063  
-0. 367119594275584  
-4. 52251549702859  
-1. 08225634913965  
-1. 51017843115001  
-0. 390031734817931  
-1. 76944966097112  
1. 17965887242636  
-2. 76792823696304  
-0. 474295692603848  
-2. 86452939774265  
-0. 344873535222529  
4. 39444302474432  
2. 04292025712369  
-3. 96368547593793  
-0. 460944940917036  
-0. 497998430302068  
-1. 19054175419480  
-0. 790226875548535  
0. 919654160878360  
1. 24672361142891  
2. 56866433901208  
-3. 75477343678692  
-2. 39901845422193  
-1. 71122948813636  
1. 53359061753041  
2. 90353670536292  
-2. 74767408841365  
3. 46226188382274  
2. 61293425260941  
-1. 56542211002115  
3. 37097465106115  
-3. 95549118016056  
-1. 11523682787178  
0. 741105741810866  
1. 68232709708547

-1. 13217558918647  
-0. 589549424283262  
-1. 45982703534596  
-1. 20438581162753  
0. 392404555575535  
-1. 20682585349746  
-0. 470828062305759  
-1. 46254676876159  
0. 468416920904221  
0. 657860034424202  
1. 50959196857484  
0. 157099931174519  
-1. 10320389964815  
-0. 278918229298299  
2. 374605116501634E-003  
7. 173338377166812E-002  
-2. 39901391972404  
0. 869969476505082  
1. 16556831952187  
-0. 160826896034869  
-0. 786595743647326  
-0. 866521036432999  
-0. 681996258129432  
-0. 409999539429195  
-0. 898589431774912  
0. 554639734994105  
-0. 345225943382402  
0. 766787253000977  
-0. 826739768952962  
-9. 584671601794315E-003  
-0. 675947208223530  
1. 05477159860119  
0. 524958049562024  
0. 287694604000972  
-1. 31392361184714  
-0. 527328680289776  
-0. 922960388059646  
-9. 539634775772952E-002  
0. 194877233587699  
-0. 643172396276833  
0. 255884204989118  
-1. 29795541803800  
-5. 821269635002928E-002  
0. 781135661808128  
-0. 171247140467318  
-0. 972766094986319

0. 347772677283817  
0. 367805621807520  
-0. 220522645783266  
-0. 200545878140930  
-0. 553761392042611  
0. 465163312726630  
-0. 304957317096816  
-0. 405089832885850  
0. 325079619981027  
-0. 395695945249656  
1. 46257206120209  
1. 00147288363812  
0. 143855361956628  
-1. 06922433966223  
0. 948119173880719  
-0. 344385496806432  
1. 78979916570441  
0. 461368510821520  
-0. 124203855451357  
-0. 443056116133523  
7. 357438486527733E-002  
9. 990697671702260E-002  
0. 185822393202361  
-1. 19095890078448  
0. 483049200565102  
-2. 068664435559692E-002  
1. 49182687851886  
6. 946999719468952E-002  
-1. 57767911593140  
-0. 692110243373501  
-0. 573017052156159  
1. 52951811257621  
1. 64439319586125  
-0. 457426991118526  
-1. 37776813873321  
0. 237387538969391  
-0. 867288898836587  
-1. 63543126635866  
1. 65445597729437  
-2. 11450798232668  
0. 979431234243532  
0. 817483981982538  
1. 05633895292751  
-0. 738885408522529  
0. 824851577013418  
0. 577088550710762



1. 76712558485339  
0. 356265707383418  
-1. 54361365249432  
-6. 902336836082038E-002  
-0. 347247922952161  
-5. 781743332951305E-002  
1. 19461804479324  
0. 861419371201363  
-0. 922824578228503  
0. 335613396762460  
0. 562839828830690  
0. 949524158454606  
1. 03557550232920  
-8. 364542085522612E-002  
-0. 583405219463140  
0. 271866305380251  
3. 596227518334378E-002  
0. 478787797949379  
0. 401573765007064  
-0. 233129152894046  
-0. 845320550644866  
0. 765968281163460  
0. 346083471721507  
0. 811934884399502  
-2. 47547451609666  
0. 223007001981808  
-7. 697911788766558E-002  
0. 817323641098570  
-1. 19444047284819  
0. 598398908905645  
0. 867932918875686  
-5. 217351976871790E-002  
1. 55369630010837  
-7. 025955406485719E-002  
-1. 83345450626329  
1. 52835994989482  
-0. 118128160447683  
-2. 17961383198376  
1. 73852045547513  
-2. 20529472369472  
-0. 900388798807472  
-2. 83969204178705  
-1. 88194984072838  
-0. 862686115269999  
-3. 21346599924795  
0. 738710209500978

1. 88359741439408  
0. 249425031014145  
0. 163587691089009  
-1. 90120780389985  
-0. 565017611345909  
-1. 64842467457597  
-1. 77993127510486  
-0. 935411033139055  
1. 26106666124843  
-0. 709919923615667  
0. 842344182416093  
0. 254553047628311  
0. 517395857127408  
-1. 20087275930184  
0. 865647573343832  
0. 125447790482151  
0. 205164221143728  
2. 65911634625721  
1. 49710989532207  
0. 707737191106419  
1. 68180848129659  
-2. 33206649271358  
-0. 573878490476711  
-1. 41317996282019  
-1. 50340607655386  
-0. 758460905356679  
-2. 68737988191814  
-1. 31208135597075  
-0. 219825163921697  
2. 31649122713677  
1. 18995116627349  
-0. 782121901122715  
-1. 50924366513646  
-1. 43462505752029  
-0. 725139933461621  
-1. 11870804051029  
0. 749887254376335  
0. 848215427241858  
1. 06258439061236  
-2. 72121234679323  
0. 821297973770639  
-0. 261094801594868  
1. 70954989662588  
1. 34122084956976  
0. 140521742854904  
1. 17605251744736

0. 145934717642940  
-0. 777519735178401  
-2. 11905873314778  
2. 01939117105470  
2. 35866840983667  
2. 64630861924631  
2. 36565129364635  
-2. 10559236718052  
1. 48176146165575  
-0. 153443037669588  
-0. 450804680206962  
2. 51871564518518  
0. 109196412753884  
1. 22829504923250  
-0. 711419790197208  
-0. 658355736808091  
-1. 20825389280417  
-2. 60968290358861  
-3. 336114045572276E-002  
0. 396506401198672  
3. 35376742910020  
0. 631716230344006  
-2. 36838535472072  
-0. 253894249610212  
0. 550484424592942  
-1. 30714216291182  
0. 585793293118418  
7. 613307697563412E-002  
0. 856221513626147  
0. 842604684184922  
-1. 97559039515380  
-0. 215581435243441  
-0. 134770039989650  
1. 90948418863647  
-1. 08432649176886  
0. 630764148502183  
0. 828521754124707  
-1. 37104713721347  
-0. 558275146385537  
0. 467415046666441  
-0. 663968507091089  
0. 637945743039155  
-2. 27433783404551  
0. 320795942473731  
-0. 379310116913620  
0. 664190969353529

0. 848817556784158  
-1. 45020772423713  
1. 57762873009577  
0. 175601623283057  
1. 71186213414247  
-0. 756648999716678  
2. 72924089175851  
1. 51609169972102  
4. 49985461156740  
0. 541045858805068  
1. 19596618650685  
-1. 30756906928987  
-0. 535324049266193  
0. 293766054332934  
0. 151533728947205  
1. 13010000525391  
0. 721107052610707  
0. 803882741894932  
1. 79775926745370  
-0. 216965377174421  
-2. 33126097967143  
1. 98058130323699  
-1. 81239853298710  
3. 85987838635182  
-8. 010305703343364E-002  
-1. 64418988157302  
-2. 22584691957121  
1. 25885064863674  
-1. 38059756304810  
2. 59658617423581  
-0. 936026904452385  
-1. 62130142420069  
-0. 567756006545790  
0. 667158635786107  
-2. 27947671705279  
2. 11887251640226  
-1. 05589525437373  
0. 787363615471243  
0. 585102939246300  
0. 817212732989503  
-0. 301477866258105  
-1. 38728479261903  
-1. 54020939829435  
-0. 126688879755421  
2. 96313204120755  
-1. 77447603905987

1. 53458762221576  
0. 431426488672317  
-1. 09321050434338  
0. 130951143669448  
-0. 842954090321699  
-0. 181924908527341  
2. 28677465410533  
0. 961126173428298  
-0. 321365181386966  
0. 634734165506928  
-0. 973665265518318  
-1. 10517595766572  
0. 210349408199131  
-0. 626089038075105  
0. 452200853086087  
-0. 238739250668049  
0. 674415253547078  
0. 267842889398989  
0. 262295715681080  
-1. 39662861169450  
-2. 09414852136340  
0. 555686162645050  
0. 296577800193987  
-0. 689595879959409  
0. 282554989417473  
-0. 608739978136238  
-1. 91066294684497  
4. 024479306438636E-002  
-0. 327175461361868  
-0. 660685781863685  
0. 251607962904497  
1. 420811006448539E-002  
-0. 839286314515866  
-0. 324259824253017  
0. 355071453915500  
1. 85663853912615  
1. 09649767420662  
-0. 602355392803236  
0. 370935183691190  
1. 62134986017915  
0. 692291143512134  
-4. 364445620804196E-003  
0. 174604913225659  
0. 489421620468130  
0. 337317902581895  
0. 260375527231097

0. 157857062789946  
0. 254350727145334  
0. 910302714475623  
0. 484675457272568  
-1. 11717552176551  
-0. 979226086451613  
-0. 184488704390441  
0. 553713701686473  
-0. 184164861619642  
-9. 305257219846176E-002  
-0. 265117431180744  
-9. 280136570847886E-002  
-0. 741188466593814  
0. 482750029744098  
0. 944337209289972  
0. 122118211983286  
1. 02204476457978  
0. 995469312766043  
-2. 70999312500059  
3. 56488154574375  
-2. 34102618949988  
4. 34846170618528  
0. 840871773391087  
-0. 235369649100324  
0. 382897700844326  
1. 70924665411513  
-1. 80810053815106  
3. 14095523223579  
-0. 849254680704819  
-0. 707460891607562  
-0. 771031513522955  
0. 875580695254498  
-1. 14631785961320  
2. 57536332399187  
0. 932896365433359  
0. 544434368403189  
1. 59986675571094  
1. 02137929480164  
-0. 237821913910129  
8. 660223463975037E-003  
-0. 149554004884399  
8. 229816727079164E-002  
2. 40539395899657  
-2. 09623661936583  
2. 00536112618648  
-0. 477633883940261

-2. 38430374989576  
1. 73994709440868  
-1. 40458635161806  
1. 11268221296066  
0. 280754730785687  
-0. 480271843823267  
0. 214421751727875  
-0. 117148519232279  
0. 217754211158316  
-8. 577164048033163E-002  
1. 34001541638674  
0. 398152643003435  
2. 26785160182898  
-0. 322741596506551  
0. 526635516373922  
-0. 105113239197872  
-3. 549217505650137E-002  
-2. 668156219587793E-002  
0. 233714458009491  
-0. 665270186030750  
-1. 28327830529253  
1. 65365078935763  
-0. 707747684797453  
0. 321671694418685  
0. 774102974153334  
-0. 199033612942401  
0. 771671566963482  
1. 28502595870258  
0. 109091156930375  
0. 181285736570470  
-0. 266379105164557  
-0. 521119923767032  
-0. 940582110444562  
0. 335282753082572  
0. 144262307713254  
4. 569269180723624E-002  
0. 384805968277069  
-0. 304394978651155  
-1. 51947196415781  
0. 325080575788076  
0. 866183472853300  
-0. 140385867321532  
-6. 308450590870367E-002  
0. 584942208815773  
-0. 226839075188580  
0. 999087927231513

0. 975082826653186  
1. 18153155942406  
1. 15016370576893  
1. 79263340785021  
-5. 590287785037678E-002  
-0. 242677743678361  
0. 814541089746790  
0. 482475406472147  
-0. 297029360826772  
0. 355497430300808  
0. 740653375323444  
7. 226453445048897E-002  
-8. 06578036765919  
0. 201009425825386  
3. 80575227457889  
-1. 28783335363927  
4. 85982318325392  
-4. 00225970289091  
-0. 933368914011522  
-4. 95860805965807  
-4. 44901787257087  
-0. 248404416671033  
-2. 01904551040061  
2. 21002598181848  
3. 46558264911767  
-0. 982035035174256  
-3. 12705781426135  
-4. 71652211527809  
-2. 05993102789778  
-2. 95786538284862  
-3. 57713714503109  
-1. 32154068187755  
-1. 12331022224771  
-3. 61314934285476  
-2. 84514218362844  
-1. 89387481303418  
0. 871700991918522  
1. 89273589034154  
0. 595689430863625  
2. 36470838688092  
-2. 51499248784246  
4. 51433159751295  
1. 59055064165162  
1. 74243375721170  
0. 713162302973001  
-0. 230145714308290



0. 600329417941233  
-1. 97225259374454  
-1. 56788314181734  
-1. 06530262877163  
-1. 43001098412022  
-1. 22406169148194  
-1. 42795917879131  
0. 163068178719355  
0. 586721641877569  
-1. 70786626387852  
-7. 703497092359302E-002  
-3. 90813302144480  
-0. 327258974542224  
-2. 08708724181251  
-0. 281349020216370  
-0. 668232214760294  
0. 992946477299121  
-0. 708374802334782  
1. 84296133908915  
1. 36311072890206  
0. 350397619622760  
-0. 516953674760113  
0. 156446016236230  
-7. 581745999382138E-002  
0. 818038075487808  
0. 427343688928099  
0. 507403425735732  
-0. 273584842644352  
0. 384205660899307  
-3. 35642478545293  
1. 32799914003309  
-2. 61382126646969  
-2. 34271532988979  
-1. 26538161320457  
-1. 37150336775455  
-1. 00855117712496  
1. 07008942407299  
2. 88824179742012  
0. 721863836271423  
-1. 06232149117063  
-1. 47013411335253  
-0. 111049143771733  
0. 771914762674444  
-1. 19577281016239  
-0. 353619187007134  
1. 22600374058642

-1. 92035618301273  
-1. 90118757252098  
-1. 42979290623449  
-0. 356310429987624  
  1. 49423035218548  
  3. 64183559949545  
-3. 950734190227862E-002  
  0. 768143028479079  
  0. 229702014967967  
  -1. 68854557247391  
  3. 00749716093142  
  0. 355013986833762  
  0. 871383500649596  
  1. 13597899919936  
  -1. 19485503522159  
  1. 34290123925165  
  0. 740621902503035  
  0. 383735056626813  
  1. 36815813114516  
-0. 339112441547310  
  1. 63188254244395  
-0. 413338936840102  
-6. 085531772930974E-002  
  0. 118865025144794  
  0. 728432866355453  
  0. 680482159890216  
-0. 815860274114476  
-5. 276146456500083E-002  
  3. 41112089392179  
  1. 57393231777304  
-0. 617053085074596  
  -1. 08526310446808  
-0. 399224058208285  
  0. 192166416192080  
-0. 231146822306637  
  0. 182825201442270  
  8. 093293295969869E-002  
-0. 136971532710055  
  1. 04873255790846  
-0. 895879263508256  
  3. 05517797531275  
  0. 429575885803164  
  -1. 17322201186634  
  -1. 88559359087424  
-0. 420173399371190  
  -1. 13400396588740

2. 00576708412979  
-2. 54243171621585  
-2. 72082167952714  
2. 04510554074625  
3. 56135112561704  
-1. 40303516528750  
0. 169710690265319  
-1. 72745606474873  
-0. 836936907925581  
3. 642638690953633E-002  
1. 10516540208698  
-0. 958705139280928  
-0. 176933096232236  
-1. 80986414889925  
-4. 61927402430023  
-1. 64111296701358  
-3. 64573424804569  
-3. 20048916201826  
0. 180330667020643  
0. 783789669025115  
-1. 13459887281435  
0. 816057430954321  
-2. 56480143234407  
0. 608770159029941  
-1. 28120911639634  
0. 713990864685991  
-0. 830045043395076  
3. 93507702759049  
1. 193662452178380E-004  
-2. 99309468326756  
0. 973278423789879  
0. 686969895095166  
-0. 243564837753903  
-0. 312166157482069  
-0. 639499443953024  
-1. 47894244005971  
0. 983287116218505  
5. 348257489594719E-002  
-0. 736771353325478  
-2. 85874879437120  
2. 24777962528373  
1. 05826939157476  
1. 83672359258990  
-2. 26339466136369  
-1. 32374628870893  
0. 591906199361400

-0. 186983290803029  
1. 28968064591507  
-0. 749177624366223  
-1. 19826769011232  
-1. 97465572261784  
0. 477617748207161  
1. 38780997001386  
0. 244675176668399  
1. 34532079506204  
1. 04638668701881  
-0. 765242756984503  
1. 24929668909275  
-1. 43226772088783  
0. 841457086860501  
0. 186812891150021  
0. 644102238464023  
-0. 168342160369494  
0. 211428056705936  
-0. 224880842727294  
0. 296178462383738  
-0. 409988397009339  
0. 664486734728299  
0. 601440855911258  
-0. 627582321811174  
-0. 456658453247097  
0. 196981829276786  
1. 03315250054931  
-0. 473243882417304  
0. 643349373966360  
-0. 672700852165734  
0. 805213248128640  
0. 665169524720235  
0. 115168813882016  
-0. 319156595005584  
0. 801480431749035  
-8. 693622412157448E-002  
1. 61973217067977  
8. 302432793002518E-003  
-2. 57298373962191  
-1. 03542933380296  
-0. 450377406318769  
2. 13949769002293  
3. 27366013188892  
1. 49434803917364  
-2. 64438064798551  
1. 21619941946716

0. 199144160106912  
5. 324738522390959E-002  
4. 57130437442601  
1. 29190028662587  
-1. 10735810113120  
-0. 151146238226723  
-2. 26392107945129  
1. 03782590977282  
1. 09494783421185  
-1. 97555294032279  
-1. 21176680289018  
-3. 14556804956057  
1. 86883926021747  
1. 81537889542940  
-1. 24403771233552  
-0. 887416941024920  
1. 01317980491922  
0. 931334733895149  
1. 05163792261944  
1. 12063929753308  
-1. 32464933375497  
0. 946788410546144  
1. 19233173078702  
-0. 345708582307484  
0. 653913443007583  
-1. 65193620792031  
-4. 680850633634674E-002  
0. 198261826764275  
-1. 39698300922462  
-0. 868640035805565  
-0. 952670088525920  
-0. 875136892772969  
0. 133901982202381  
2. 59313084029359  
0. 954453468058136  
6. 029703061186086E-002  
-0. 137480963056572  
1. 15640705646066  
-0. 425783261711475  
-1. 81940365011207  
-0. 103714584969263  
3. 011840535104404E-002  
0. 560500326820318  
-0. 600465997116712  
0. 219401902987842  
-0. 443812346480417

0. 847035960305048  
0. 688551798978924  
2. 48728110983342  
0. 251266856589632  
-1. 25800706284376  
0. 60962656557179  
0. 497784100824814  
-1. 91792340894947  
1. 41232425826855  
-3. 47203103678838  
-0. 854828492433370  
-1. 95073582785157  
-0. 373963153373742  
0. 356590658244888  
0. 253180217332457  
-0. 835984950160448  
-1. 33364867022625  
0. 390410851244141  
0. 648250659444978  
0. 864547179576238  
1. 95366710129535  
1. 35946939684481  
-0. 667180777949557  
-9. 093315507096250E-002  
-0. 475201589804710  
1. 80256983561667  
-2. 22095927152191  
-1. 06264961258865  
-0. 458447287030734  
-0. 155818370899288  
0. 120793924032262  
0. 523638616574520  
2. 40915812093171  
-0. 166550095054438  
1. 50136020389354  
-1. 38597412183909  
1. 87359648260767  
0. 566506442780799  
0. 481218852352557  
-0. 816263355200583  
0. 541831565406314  
3. 515544149701938E-002  
0. 882232438025058  
-2. 04071078857438  
-0. 132167689592583  
-0. 400577242712259

1. 19930344064425  
0. 372285355295702  
2. 14099862304741  
-0. 590166082833769  
-0. 224022637066826  
1. 28400552345950  
-0. 840622889709320  
-0. 751072874946641  
1. 78679162963870  
-0. 442439982031154  
-0. 394954723502957  
-1. 73926643456618  
1. 26137296233314  
-0. 804837364245904  
-0. 172889143727653  
0. 835275659601802  
-0. 610598842868979  
0. 762396503311070  
-1. 93013590996734  
0. 313363844971966  
2. 91984750619157  
-0. 934456627434548  
0. 481865593059118  
-1. 49952555593498  
-1. 00755409910879  
1. 20807847903851  
-2. 94888062410105  
-0. 141632040112842  
0. 968602784305717  
-0. 376418272582866  
1. 35413955734206  
-0. 377666704742780  
1. 07557259738129  
0. 248006777624927  
0. 240289437307429  
2. 14275231360347  
-1. 08017189677945  
-0. 934875972200468  
-0. 547727491150830  
0. 490033927475807  
1. 20343945533243  
-1. 05796867977888  
1. 90161218619035  
0. 138815919655251  
-0. 496084678969669  
0. 770671451525809

0. 279628325379615  
-5. 891075469739014E-002  
-1. 49531976328333  
0. 216615624541107  
-0. 253686155416694  
0. 814828589075399  
0. 343395710986434  
0. 950610179413381  
-0. 315845537238652  
0. 887830097266025  
0. 847727829594296  
-1. 22844702295975  
0. 913186782001209  
-0. 704389917677620  
-0. 196006988226606  
1. 01175750667933  
-1. 28163122808713  
0. 329250835248438  
1. 51895610678583  
1. 17849493622622  
0. 717379343755096  
0. 927652690445589  
2. 56780552266077  
-8. 057849506389206E-002  
2. 55900735473158  
-0. 893298953503003  
-1. 55070153583594  
1. 96975286387064  
-0. 815189147256548  
-0. 466023499556592  
-1. 51090382343175  
-1. 04161726490884  
0. 785908247358040  
7. 508305976918067E-002  
5. 90381309040021  
1. 82533186733036  
1. 02561944220718  
-0. 956721985337268  
-3. 01078576599733  
3. 40806935970476  
-0. 530798653411817  
1. 91651427948720  
-1. 80893903194474  
1. 03073507118284  
-0. 303449838511384  
-2. 02738803210071



-5. 14303259267842  
0. 895111414999729  
1. 90122425830054  
-1. 89542004416249  
-1. 17002424414059  
1. 60493068633040  
-1. 18589225034407  
2. 56439348878773  
0. 285932167521303  
1. 06956186934723  
2. 09059273968710  
0. 790676509063556  
-1. 32988474543034  
-1. 26382349927225  
-1. 42963809056720  
-1. 57398266049344  
1. 36645569947136  
-1. 24812536756213  
-1. 26322132792526  
0. 889369319032686  
0. 288454716573895  
-2. 43671653754500  
3. 62529969137231  
-2. 34388436747486  
-4. 748737149395485E-002  
-3. 23731303264622  
-1. 20086086035293  
0. 108436148916465  
-1. 23699689958938  
1. 20212607997639  
1. 30079582994893  
-0. 447605334953006  
-1. 36036278124194  
-1. 25525807197059  
-0. 823193307340584  
-4. 917521068514639E-002  
9. 323212812567368E-002  
1. 88575861897951  
-3. 57936227572540  
-1. 98161156572320  
-2. 69209652532647  
-1. 57548566330626  
1. 60224359420602  
0. 362567959648297  
1. 03438211519320  
1. 70308746999292

-1.69343353023281  
0.741535923629859  
1.51037833096568  
1.34412336861025  
-0.581449405760996  
0.764935744401722  
-5.589366590709190E-002  
0.245274391949948  
0.726485588107495  
0.232038985981862  
-0.822768638053815  
0.393326154154387  
-1.79853934826061  
1.31947697410567  
0.522191613854371  
-0.352146571558295  
-0.975450432640182  
-2.04172084691107  
-0.312487576531869  
-0.920064387082438  
1.18726787550270  
0.778774407537256  
-1.09268919586563  
-0.172655188172386  
-0.711398159518754  
-1.53310605491109  
0.539646246453583  
-0.376969854853341  
2.06199523856232  
0.995126407117484  
-1.01489793153021  
0.164478930420197  
-1.55689048160434  
0.677075606503610  
-0.308251166340979  
0.253365714935274  
1.67012268967253  
-0.493844573199814  
-0.975295139675614  
-0.324528423500087  
0.624542131763320  
0.785412148381347  
2.21475998783880  
-0.980465107500675  
-0.270418635213520  
0.260969129771812

-0. 403018518777962  
-1. 235638959955185E-002  
0. 792436031474049  
-0. 823006789488692  
-1. 75825347699050  
-0. 609156436911323  
-1. 73476357932101  
-2. 72238789185975  
0. 213460797833994  
0. 828653446913961  
-0. 954703274028766  
-1. 14683202597195  
-1. 23389627849452  
0. 107544404264704  
-0. 707169541211217  
-0. 335981422190093

1. 59019188352248  
0. 326572236608398  
1. 16855847921429  
0. 378093792342394  
-0. 769677872528980  
0. 841160409437991  
-2. 62730578029655  
1. 26111088248324  
0. 465711764804074  
-1. 04615521788817  
-1. 51307422267447  
0. 114671165357695  
0. 610956652856985  
-0. 501718181347691  
0. 287554152371307  
-0. 810573445054705  
0. 855696719074733  
-3. 91770458454493  
1. 03260489459096  
-2. 82571071474911  
2. 26219450333246  
-1. 13675775692612  
-1. 14779457874482  
-1. 77868551748226  
-1. 33628553980873  
-1. 27895854514603  
-0. 975574170622128  
2. 99360042642921  
1. 69532955879769

3. 00444422557997  
0. 397170455213303  
1. 81377644299077  
-1. 68417846271327  
2. 01530593770431  
0. 860929390494984  
0. 364206188236190  
-0. 947271046190799  
-0. 451479834822687  
5. 223211983618213E-002  
-1. 927545784444843E-002  
-0. 578433563870418  
0. 971638654928576  
-0. 597704621425671  
2. 83386096751837  
0. 674061390372123  
0. 148862546933748  
0. 757166402697829  
-0. 813670409918669  
-0. 974274612195876  
0. 684290693361703  
-0. 220618108079047  
0. 667712740106017  
-2. 73794846276812  
0. 295535825501135  
-2. 85997691724423  
0. 883142153803067  
-1. 50983402587751  
1. 30743080343727  
3. 98403021234505  
0. 666818184974420

6. 86283405422883  
-2. 75333753720825  
2. 80380709773531  
1. 70652622365915  
-6. 29181858366170  
-4. 62095562425639  
1. 35483302080823  
-5. 01512016397663  
-3. 03729051184304  
-2. 65962443551831  
-3. 71710018712370  
4. 71096429807176  
3. 54129295440023  
-6. 06547850576550

-6. 66163449873464  
5. 15345984134570  
6. 33131562195222  
-6. 01378072353346  
-6. 23990201809362  
4. 70999250850988  
-6. 56765633655958  
3. 00077637910901  
-1. 59600173479107  
-2. 33868341370883  
-6. 87144850592971  
-7. 67696370376570  
1. 92612657566411  
3. 35245419311016  
15. 1513339822046  
-6. 12096999963858  
8. 68602937288448  
-5. 71653784057303  
4. 04926717404601  
6. 50550964925029  
-4. 39587675680275  
-1. 78949129170935  
3. 93327967895123  
-1. 25055058652482  
-4. 50213840716182  
7. 47639644247418  
1. 04131744208006  
1. 72821963650819  
-3. 17185893154214  
13. 0265383986457  
1. 04756901748192  
-2. 48659387194434  
-4. 19725140515181  
-2. 31499641312628  
3. 99427366530634  
-6. 58510918829190  
-4. 70855059023730  
-8. 27386337177546  
3. 72567357999876  
4. 64620856551236  
-7. 97088062316090  
2. 94084170499544  
-5. 04198730308307  
5. 03220543464638  
3. 59334051389237  
-3. 37830750656761

2. 35689631792650

|                         |                         |
|-------------------------|-------------------------|
| 0. 108348250000000      | 0. 928360640000000      |
| 0. 519467660000000      | 1. 264585680000000      |
| 5. 061300000000000E-004 | 0. 917910540000000      |
| 9. 816979999999999E-003 | 0. 296058650000000      |
| 0. 118545700000000      | 0. 533686450000000      |
| 1. 300000000000000E-007 | 0. 310949800000000      |
| 5. 940463000000000E-002 | 0. 709091330000000      |
| 1. 696200000000000E-004 | 0. 486565820000000      |
| 1. 698300000000000E-004 | 0. 272111400000000      |
| 9. 625400000000000E-004 | 0. 121795150000000      |
| 2. 831653000000000E-002 | 0. 225490190000000      |
| 0. 000000000000000E+000 | 0. 133533580000000      |
| 5. 618720000000000E-003 | 0. 211165370000000      |
| 5. 600000000000000E-006 | 0. 150655750000000      |
| 2. 096000000000000E-005 | 0. 101124060000000      |
| 2. 996000000000000E-005 | 0. 146962150000000      |
| 2. 000000000000000E-008 | 9. 189258000000000E-002 |
| 9. 000000000000000E-008 | 0. 217123540000000      |
| 1. 087000000000000E-005 | 0. 159609020000000      |
| 1. 278300000000000E-004 | 0. 216988040000000      |

-0. 312216000000000      3. 999428000000000

tansig tansig  
20 - 30 - 60 - 1  
rmse= 6.5994 meV

W320.txt

-0. 314609746730943  
1. 48908353679868  
-0. 928591245826782  
2. 59038222473859  
-1. 43940951039130  
1. 44344541827457  
-3. 03926970659639  
0. 643520640675939  
0. 531378890818386  
-2. 06985283716209  
0. 659105501413001  
-0. 782099126965111  
1. 57421844682341  
-1. 11743255299699

-0. 568173485456725  
0. 156076591098330  
-0. 692536588707836  
-0. 844375660171217  
1. 15910262884202  
0. 187681242914331  
0. 664457117148363  
-0. 862794167528559  
0. 242451941666750  
-0. 576776822395060  
0. 474820224719550  
-1. 25097311701559  
0. 880850233127576  
-0. 803397336121539  
1. 705692626312865E-002  
0. 459201595983966  
-0. 123002934125712  
0. 789846539988975  
-0. 546747536501468  
0. 592799609067605  
-6. 092699683218383E-002  
-8. 931552757179836E-002  
0. 411354835047640  
-4. 934464897032108E-002  
0. 119939441501750  
-0. 185036155189853  
0. 977359783343224  
-1. 90564745161693  
0. 819368319232571  
-0. 456615041693152  
0. 948696569335187  
0. 164926868860197  
1. 36788658005765  
-1. 11256724663789  
-0. 204306073868973  
0. 514585324841443  
-0. 272905847814003  
-4. 214522783439163E-002  
-0. 775286484904922  
0. 259100546165655  
-4. 240234115866821E-002  
0. 112231144993906  
-0. 277490563674891  
5. 254610016475683E-002  
0. 279488663323543  
-0. 444754022131524

-0. 307033945441523  
-1. 64673311823487  
-0. 318980824178994  
1. 71687021383657  
0. 671416893463976  
-1. 13273997832518  
1. 40817073870059  
2. 26889974430571  
-1. 28514439493306  
-1. 02235174873234  
-0. 226236328934687  
0. 819181715913561  
-0. 675737999407681  
-0. 158808572284602  
0. 498426781550345  
-6. 171554492801053E-002  
-0. 249032145291801  
0. 565553793345848  
-1. 19932783276495  
0. 483022180642652  
-2. 378607107325154E-002  
-0. 859060832877668  
0. 316497923420313  
-0. 334275591807746  
-0. 440031801991890  
1. 04844384216070  
1. 56412248000122  
0. 615169640258309  
-0. 383119724126357  
0. 683801848551129  
0. 369430598156382  
-0. 843059073526496  
-1. 06428242500408  
-0. 237113182300797  
0. 313278111348451  
-0. 214417237457238  
-0. 140306216615910  
0. 216591558978370  
-0. 136410393575109  
0. 172189211750912  
-0. 152130841747152  
1. 09047621108610  
-0. 746097554994145  
0. 549397516617450  
-0. 361393677312257  
-0. 418041061828131



-1. 07507216943321  
0. 384184153598209  
-6. 986364666211678E-002  
-0. 769558436383765  
-6. 325247999723298E-002  
-0. 264359004266826  
0. 854286705413316  
-0. 208068068536531  
0. 193440318764315  
0. 141224526385635  
3. 366818302941517E-002  
0. 248989652450453  
2. 890269537358484E-003  
0. 191181665602835  
-0. 734799084731073  
-0. 357816874212895  
0. 284626303373040  
0. 116299833921962  
-0. 231115075047389  
-1. 476744023800770E-002  
0. 932034196879762  
0. 414170375930777  
-0. 212001074029577  
0. 241312561340136  
0. 423792487360090  
-2. 191353761002506E-003  
-0. 500866592934907  
-3. 649568139281317E-002  
4. 948503429426861E-002  
4. 509593500892367E-003  
-6. 581608138731414E-002  
-0. 168880283564051  
-0. 250532001232579  
4. 657375572331536E-002  
0. 112819627465493  
1. 02831148985896  
-5. 446820538364270E-003  
-6. 825605111592153E-002  
-0. 874621660355564  
0. 991350776907673  
0. 285739795110232  
-0. 465958051248980  
-0. 320042240617772  
0. 321615464629401  
0. 350378227820544  
-5. 582671094387635E-002

-0. 291016814872166  
-0. 236744610718165  
7. 334186733734485E-002  
0. 190556127679666  
-9. 059273109680981E-002  
-8. 731018248122488E-002  
0. 375220991694107  
8. 266756265739446E-002  
-0. 100569193150616  
-0. 215208094954688  
0. 964408857127091  
0. 987050556641215  
0. 441718585885841  
-6. 323892508406674E-002  
4. 765852424832572E-002  
-0. 697504463931250  
-0. 169711072221736  
-0. 859169491730655  
-0. 238230993247607  
-0. 342558243078232  
2. 441803281597633E-003  
0. 451458745419747  
-0. 155952020925762  
-0. 320525088723303  
-1. 645193311878529E-002  
-0. 142357399524647  
0. 183051611906893  
-5. 614649733034645E-002  
0. 248989733494048  
-0. 667914057886724  
2. 050706527685347E-002  
-0. 264946615255076  
0. 258290425834252  
-1. 03231640388480  
1. 44054705553971  
-0. 575946497737608  
0. 104189838520076  
0. 699618675438652  
0. 271481917197651  
0. 838022600327654  
-0. 951479136586651  
0. 502793583180102  
-0. 359775679516821  
-0. 288483617249322  
0. 461979947495145  
-0. 520113103946221

-0. 178014450520895  
-0. 196253899370755  
0. 689368244823639  
-0. 554472442121514  
-0. 434057719347585  
0. 709941074141933  
0. 813238960362645  
0. 537158559116482  
-1. 47243900489098  
1. 47200058751858  
-1. 00533023996180  
-0. 738091263363787  
-0. 408778945659786  
-0. 462737399531776  
0. 864201696275195  
-0. 146610130412213  
1. 12504743981547  
-0. 160528121334468  
-0. 409105321078417  
0. 671260076077008  
-1. 45018861267472  
-6. 682059150053198E-002  
-0. 800796690412736  
0. 364741813084864  
-5. 871273228155847E-002  
0. 479852376381840  
0. 103255571739020  
0. 265926728160783  
-1. 00941999198035  
0. 249521843417677  
-0. 193796223924968  
-0. 295578338146850  
1. 863240275594882E-002  
-0. 297923105469304  
0. 483332037708105  
-2. 928329204281611E-002  
0. 137118127341844  
0. 137760826402897  
-7. 416493283558402E-002  
0. 251610799262929  
-0. 202360621738736  
-0. 111756836073874  
0. 871648146996578  
0. 548301656757242  
-0. 158418388985971  
0. 284503344723849

-0. 123447206789216  
0. 231953869780473  
-0. 864970771624770  
-0. 201587168418473  
-0. 309728342174774  
-0. 547179837390704  
-0. 119994771720999  
-0. 427864593707647  
0. 509753795454628  
0. 106837537560366  
0. 294045221409074  
-3. 871809620594031E-002  
-2. 124407911593645E-002  
-4. 679838260573668E-002  
-0. 115348276181441  
8. 098205305653106E-002  
0. 779416410086734  
0. 442407229401652  
-0. 181116247901924  
-1. 77341630087253  
0. 858165736384683  
-0. 284565569126398  
0. 100984464610306  
-0. 474895014912571  
9. 587503179982192E-002  
0. 342541766798021  
-4. 722038091246183E-002  
0. 615233838827769  
0. 215207639237111  
1. 15899309454061  
-0. 412811664704608  
-0. 153626538109805  
0. 609204508462788  
-1. 11199041123093  
-0. 226791272369621  
-0. 143748106869690  
0. 854557161745388  
-0. 837294288298988  
0. 840034751583530  
0. 137521340712571  
0. 414160737393150  
-0. 956893683023453  
1. 43550720227551  
-1. 10726365290008  
-0. 343639742727124  
1. 38992348123245

-0. 197643720563746  
0. 378836389816463  
-1. 34544594634530  
0. 467647587120979  
0. 315997263052146  
-6. 896860403615160E-002  
-0. 158170322111209  
0. 426604155058261  
-0. 546095353437139  
2. 287861165060260E-003  
0. 817857429807853  
2. 738529186605846E-002  
0. 548947741848348  
1. 46828223187443  
-1. 66006036226967  
-0. 528689152514589  
-0. 874942609300739  
-0. 917838919998053  
-4. 411604884990137E-002  
-1. 00600255309526  
0. 868885354994013  
0. 652038190297093  
0. 145470718287301  
-0. 163773292352571  
-0. 235942606992949  
0. 342930803840840  
-0. 248484959387301  
0. 132948625616387  
0. 845314437213805  
-0. 123327438979181  
-1. 35882882460145  
-0. 476444125284177  
5. 232793462002626E-002  
0. 284843160820306  
1. 73840587982473  
-0. 166724150744105  
-0. 870912362661342  
0. 391141241966472  
0. 450149661192268  
0. 241653300693252  
-0. 634158288506004  
2. 647790738147053E-002  
0. 247585746349338  
-2. 456199251824223E-002  
-0. 449343874348616  
6. 224356678251278E-002

0. 526397328624145  
0. 135423400529283  
-8. 438201486692037E-002  
-6. 320342600878182E-002  
1. 09337023912597  
-1. 47680565778367  
0. 317079797401306  
-0. 787500677750363  
0. 486869974706465  
0. 930699340839204  
2. 23473479642678  
-3. 30141013215025  
1. 49887835835212  
0. 333665061231167  
0. 230844337061289  
-2. 925469966327676E-002  
-1. 08420169580583  
1. 96942453874082  
-1. 17356318480158  
-0. 384854571770486  
2. 26318553676765  
-1. 76380475445969  
0. 466597204179285  
-0. 147941827869313  
0. 138488905821293  
0. 171799909433450  
0. 244434423613088  
-1. 22666547244727  
-0. 519363218652598  
-0. 360638581122607  
1. 33835588023226  
7. 101981142323999E-003  
0. 253721601860904  
0. 827809484187806  
0. 134836211756701  
0. 389397683689104  
-0. 471530869741606  
0. 411733395860542  
7. 037184787450668E-002  
0. 264457255258956  
2. 142803526816731E-002  
-0. 557382085167614  
-0. 521428387523759  
-0. 235409742904943  
0. 716296566360031  
0. 723075904159395

0. 410541695840749  
-0. 714125655035209  
-0. 388561894962011  
0. 297982775616404  
-1. 05763121442069  
9. 146886582411845E-002  
0. 813890745292755  
8. 041518389756455E-002  
-6. 264309114799145E-002  
-0. 304623406828620  
0. 695397772415260  
-8. 809895666517778E-002  
0. 125729890069534  
0. 138284570025860  
-0. 364760199728671  
0. 132069854477970  
-0. 500106945749491  
-9. 390168403340384E-003  
-0. 285358039555961  
0. 831745810340303  
1. 41205194395835  
0. 601444780643722  
-7. 751579958269686E-002  
-1. 12157618532090  
-1. 82573710563875  
0. 690472172636766  
0. 228964271089018  
-0. 310908568987512  
-2. 519867469626145E-002  
0. 181576286079244  
0. 610519569926217  
-0. 427984519986920  
4. 284552161164751E-002  
0. 114355577620317  
-0. 283565064985479  
0. 147770378543086  
6. 651834235338221E-002  
-9. 225518140043591E-002  
-0. 933773025629509  
1. 78320252661117  
1. 07266379883485  
1. 16779572281898  
-1. 26694947055246  
-3. 05077657949963  
-2. 14706013011944  
2. 14752356348555

-0. 262012614814048  
-0. 866913808418334  
0. 393164601178815  
0. 942687268100719  
1. 03079011096459  
-0. 838491922082254  
0. 392371021578096  
0. 110502494608652  
-8. 843175821984227E-002  
0. 672807752843328  
-0. 206280834562069  
0. 182577477348681  
1. 97350780974106  
1. 36309666461240  
-0. 511371489559155  
-0. 270792990704455  
-0. 228691779125935  
-0. 122794986813893  
-2. 96267587961842  
0. 510466815118627  
0. 368119685782516  
2. 424177978973982E-002  
0. 297570963673633  
-0. 213144749878141  
0. 765272803409007  
-0. 317241598522954  
-0. 190743610403946  
0. 157214765689820  
-0. 253974687485470  
0. 261203700996696  
3. 618575714226544E-002  
-5. 004620107884254E-002  
0. 130849631846669  
0. 288361839325968  
-3. 655167575366767E-002  
-0. 548501324988043  
0. 126632411375418  
6. 487094761445089E-002  
-1. 83004985747662  
-0. 134411064349795  
0. 11776717929203  
-0. 903112052948005  
-3. 935129754260347E-002  
-0. 166523330643320  
1. 68628534241816  
3. 015173189654641E-004



-0.110575223602151  
-0.158797865713492  
6.066199975863829E-002  
0.144367571684497  
9.019658593624115E-002  
-2.680736764486116E-002  
0.226625044550915  
0.221314976621127  
0.181722661940553  
-0.959533061061950  
-9.294205425547353E-002  
-0.236873703476055  
0.270958966443812  
-1.02338793012330  
0.324892387084453  
0.436763346508106  
-0.121438841337834  
-0.579700028937710  
0.126091193478557  
0.945989317821300  
8.022061118569869E-002  
3.036053992445087E-002  
0.152671119312372  
-0.679664024804465  
-0.456128293702309  
-7.279201318100820E-002  
-1.06524686589860  
-0.409175789866474  
1.23269577561929  
2.83326885006548  
1.82244770833617  
2.02742552003500  
-2.17882402893611  
-2.90865942715557  
0.103832896763613  
-1.31781858972269  
-0.487357040274739  
-1.28360640539911  
0.249974327963180  
-0.182706681775035  
-0.727580270580013  
-0.208265913826387  
0.305610796152188  
0.436579962122379  
2.19723907846039  
-0.298796069179685

-0. 141502345297455  
0. 916218382356011  
-0. 699559850491281  
-0. 546207436203146  
-0. 730145069635422  
-0. 440550587803488  
-0. 516869954491369  
0. 936840995060421  
0. 113298060192988  
1. 940995739239472E-002  
0. 142362812621256  
0. 551092655854889  
0. 739912311648249  
-0. 137165157921402  
0. 324466764514639  
-4. 502855236788713E-002  
5. 507096281610314E-003  
-0. 313300592959760  
-0. 618081776454537  
-0. 209792773868273  
-0. 888004263963781  
1. 15243318795934  
-1. 87804461992592  
-0. 101958652575678  
-3. 10927340289329  
-1. 06364402977914  
1. 76633288521488  
4. 72258330441944  
0. 240615243231705  
-0. 199163182506859  
1. 20872292103157  
6. 820262794608958E-003  
7. 989699580240334E-002  
-1. 74320736876805  
-0. 141064029904338  
0. 196571676629172  
-0. 905319283134563  
-0. 215306388388183  
-1. 08833066766009  
0. 237658965808348  
0. 261770181738387  
-0. 666813908004688  
0. 138226744856807  
0. 181684293564145  
1. 03717912274877  
1. 67406526512072

-0. 301286332455891  
0. 445841429692872  
-0. 663451225170799  
-7. 539695037920233E-002  
-0. 649716506125440  
-1. 09789372203224  
0. 158849303094958  
-0. 315475894454239  
0. 338387629850827  
0. 228723809899430  
-0. 434158022644804  
-2. 412550807210053E-002  
-0. 357992029990768  
5. 826012733670299E-002  
0. 318525020860772  
-0. 806354072601645  
-1. 663336646909601E-002  
-0. 412140891448918  
0. 117469980242926  
0. 945580284472879  
0. 513187225732717  
0. 357471212090776  
-0. 145993837385684  
0. 398006195536805  
0. 235540925150362  
-0. 518799455206254  
-0. 466406061642482  
-0. 131686682985580  
4. 102485953332983E-002  
-0. 274847835279450  
8. 600629906163826E-002  
-7. 747094477729898E-002  
8. 032970976792775E-002  
0. 152157485548536  
  
-2. 02460957918976  
0. 666693325914466  
1. 08245235935203  
1. 75456204148221  
-2. 476407121851998E-002  
-0. 872872420410759  
-0. 376443898925849  
-0. 866180510019052  
7. 166144121272246E-002  
0. 929198416915008  
-0. 726769492936271

-0. 641167393478112  
-0. 795785235178766  
  1. 62897989433909  
  1. 35605541127124  
  1. 04292956396353  
  1. 59426242570835  
  2. 33807213617252  
-6. 028455921283097E-003  
  -1. 06977386381893  
-0. 948043251767463  
  -1. 33635448610823  
  -1. 48166914566058  
  -1. 60842015271255  
  -1. 79951964752434  
  0. 968860982903434  
-0. 523774371427056  
  -1. 57235368156350  
-0. 309883316172550  
  0. 552847176951085  
  
  0. 765593991345512  
  -2. 04379388185031  
-0. 390505559654906  
  0. 596889985608676  
-2. 984939321792614E-002  
  0. 173113163213329  
-3. 886244531767781E-004  
-0. 885120460322655  
  -2. 52101280516764  
  -1. 19201487081855  
-0. 662231260603773  
  -1. 40443550542997  
  0. 227666912445154  
  1. 56021011764472  
  0. 561464881375955  
  -1. 19669930695086  
-0. 307369204619201  
  0. 617325476035955  
  0. 191408077912688  
  -2. 04209428416986  
-0. 221650891425012  
-0. 115659254260393  
  1. 11293663239973  
  0. 109091248055340  
  0. 805271031160307  
  5. 752742800812036E-002

-0. 111969955900874  
0. 440295133084795  
0. 333753064321029  
1. 00261160669920  
-1. 07543427008183  
0. 448225422566657  
0. 109406763712439  
1. 00415152946948  
-0. 847683732545072  
-0. 182720605655321  
-0. 969416229047516  
-1. 14537008297501  
-0. 625945373221241  
-0. 575145002115792  
0. 156298696553606  
-0. 682046141692736  
-0. 208155351475137  
-7. 069450270165423E-003  
0. 333694738547521  
-0. 389257837767082  
-0. 615310233633080  
1. 01351686653585  
-0. 438101276449425  
-0. 377146706718572  
-0. 216355310345140  
-0. 943161701810080  
-0. 849876418266558  
1. 00612590237859  
-0. 715663293858794  
9. 456519754904363E-002  
-1. 05120718050498  
0. 314709448069232  
-0. 877166638691083  
0. 274220410416653  
1. 45000607519955  
-1. 30635613851862  
-1. 01256805397463  
-0. 459330383870618  
0. 468190980858898  
0. 620820768203170  
-0. 841509817424799  
1. 74852949979153  
0. 843854209349224  
-0. 608105355821584  
0. 950226215663526  
-0. 739949878927908

-1. 48549177514621  
0. 586386016036066  
-0. 526649809983995  
-0. 535478029669590  
-0. 177481592671025  
0. 502102386775355  
0. 915762020261975  
-2. 94305681716111  
0. 814593073948570  
-2. 51694366462638  
1. 33272691842933  
0. 643872251786280  
0. 657667124730531  
2. 13992169135766  
0. 194907527418660  
1. 05092579424116  
-0. 622181285641242  
-0. 357333770911136  
5. 263340550957565E-002  
-0. 912002018062538  
0. 801469299655322  
-0. 906951803062820  
-2. 29652364622283  
0. 291736098946498  
0. 370033278206246  
0. 451057435803741  
0. 666642553911512  
-0. 290604332003365  
-0. 251696990227968  
0. 131912620187989  
-0. 366262976254249  
-1. 50691604983441  
1. 29489800513436  
-1. 20355767743174  
-1. 04637520256102  
-1. 99880237085709  
0. 930927491575072  
2. 10655271723523  
-2. 00903794880062  
0. 614120552489383  
-0. 735252469816434  
-0. 293956615655864  
0. 219137492921832  
0. 631193125333460  
-1. 59491265125801  
-9. 124159514280336E-002

0. 615972013883087  
1. 35741947078485  
1. 07398651364287  
1. 24495432281874  
-1. 86222314110859  
-0. 451446128606463  
-1. 15002433262018  
-0. 602355076363036  
1. 85392931811980  
3. 71018412816945  
1. 83259140477121  
1. 05733308846014  
0. 204360539814199  
-1. 62157147085444  
2. 04529204046773  
4. 213048922802016E-002  
0. 906728985584630  
0. 579939625127112  
1. 52107476185995  
-2. 57750668403131  
-0. 124646899533323  
3. 49389546686886  
0. 780824280671072  
-2. 62852098749777  
0. 340025615761826  
2. 77643276821589  
9. 052758953682569E-002  
1. 49592927963867  
-0. 888659951703945  
0. 566016674931167  
0. 874274399148485  
0. 181223961174066  
-0. 872156277976157  
1. 29544366848201  
1. 05007866091957  
-0. 645699549175855  
0. 639271463604151  
-0. 701130834778831  
-1. 154417939555222E-002  
-0. 111613229461044  
0. 492055769691627  
-0. 617552265606954  
0. 795699028983910  
0. 970227590353676  
0. 620884428235506  
-1. 30737680571275

-1. 21352850241102  
-0. 457905377395263  
0. 221900965917039  
9. 282537604634596E-002  
0. 554177044135326  
-0. 927831184894574  
0. 811198418939468  
0. 476823000754508  
-0. 719017743283516  
-1. 55406338876553  
0. 815378970176726  
-0. 946243580356957  
-0. 349605436135678  
-0. 950019208383998  
-0. 999856730402395  
-1. 05690119728497  
-0. 268075398147402  
0. 784581233494262  
-0. 910339453242456  
-0. 481344979869379  
-5. 998770001575486E-002  
-0. 486235885768670  
1. 19515999308328  
0. 597933206384400  
0. 438486481297816  
-0. 401826352608236  
0. 107151025018036  
-5. 828939442454843E-002  
0. 119654486097645  
0. 120020443301077  
0. 507589084466123  
2. 44355819451708  
-0. 136993602172167  
-0. 601378899190794  
0. 542672088163269  
0. 462799359825357  
0. 527992109632846  
-0. 805733750774856  
-0. 588209048532941  
0. 522476281624136  
0. 329461723585724  
-0. 917122356727370  
-0. 697928361825163  
-0. 802050328821243  
-0. 275315108108682  
2. 09493344712043



1. 14801773007329  
-3. 11499804823340  
-1. 74464857175604  
-1. 33070888419464  
-1. 08969320009741  
1. 274880478784769E-002  
-1. 33857224361863  
2. 65624487434377  
-0. 237182285164279  
-0. 988541632647143  
-1. 29964217488211  
1. 554491699589523E-002  
1. 00303545436347  
3. 43064627250839  
1. 83650987206665  
-0. 499163328342738  
0. 764707464201031  
-1. 56315324401533  
-4. 457729010085126E-002  
-1. 48592608136171  
-3. 33964614285641  
-1. 76790799989509  
0. 508416142583301  
-0. 602677124095158  
2. 42939097495995  
0. 143908147986488  
-0. 454098132134021  
0. 842138757315565  
2. 74679236887280  
3. 43817067585387  
-3. 224639121214058E-002  
1. 26518065061739  
-1. 05369840148645  
0. 991324495415806  
0. 847377473770414  
-1. 236489271028178E-002  
2. 21002150904863  
0. 183655747186647  
0. 864134601911035  
-0. 419028205549432  
0. 293285439843994  
-0. 420252612108701  
1. 98915389634764  
-0. 688882700107096  
-2. 01732914273568  
1. 10836981440586

0. 281768201150371  
2. 877600329935468E-002  
-0. 806726405160271  
-1. 31903905004839  
0. 339653606762450  
-0. 323527736481197  
0. 756278403086261  
0. 239664810962988  
-0. 873148210046426  
1. 72753701496453  
-0. 137288951396785  
0. 583032784016828  
-1. 62848152433507  
-2. 01796552253820  
0. 399614367248879  
0. 985297013944458  
2. 36890519513633  
1. 42060274454254  
-0. 400432289442590  
0. 516389170716320  
-0. 878543398121209  
-1. 74966175907350  
-0. 455357951836624  
-0. 410238357168507  
0. 546646504787811  
2. 30184548220611  
-0. 405538602845443  
-1. 42364655699673  
-0. 138617940616459  
-0. 871981478256337  
-3. 373905245482101E-002  
6. 381189596905107E-002  
2. 03576196720158  
1. 25109614348873  
2. 043499459452607E-002  
1. 41958365009590  
-1. 12472846221807  
-0. 296801304396487  
-1. 25605993644547  
-0. 209470801081980  
-0. 801203795401151  
-0. 125041698531737  
-1. 22915410845969  
0. 495078158898048  
1. 46086284495566  
-1. 72700923892399

-8. 191769935500210E-003  
0. 432925643852664  
-1. 62318727866549  
-0. 394073461707202  
0. 449354099759851  
1. 67386470229250  
1. 73123459073328  
0. 104089475090931  
0. 734001092000887  
0. 755311490030438  
-1. 82091020166896  
0. 388674556736094  
1. 10923962910211  
-0. 932126186247076  
-0. 364104222611734  
-0. 600073412310438  
2. 75883842523114  
0. 792304701104441  
-0. 963926775587697  
1. 01390205891635  
-1. 67941114184019  
0. 249127155187724  
2. 11950431445508  
1. 15898748539123  
-2. 65418158727774  
1. 27143668060866  
0. 168978997955740  
2. 20460994031356  
-1. 33766104139643  
1. 04740859311753  
-0. 316362297822020  
-7. 986818925858663E-002  
-1. 89470906850084  
-1. 74608975178178  
-1. 08717160112080  
0. 818853562342960  
1. 28704487957720  
0. 948965063996039  
1. 57866352577588  
-2. 14075691870430  
2. 75853240066645  
-2. 31102110105214  
-0. 236827707633257  
-2. 705616982882441E-002  
0. 769293755136772  
0. 965461820295611

0. 457170356582037  
0. 162923410822126  
-0. 263278397816563  
2. 34353792972002  
1. 13647623573922  
4. 37991253957145  
-3. 12858575203515  
-2. 44668802591975  
0. 961064732543847  
-1. 44862270212152  
-0. 557579230089034  
2. 72919405091628  
0. 568186717851149  
-2. 01171435963557  
0. 702424782659106  
-0. 766789212476084  
-0. 380657304449373  
0. 534380655006963  
-2. 33707030627650  
2. 42796674212235  
1. 33310232060492  
0. 283640924654398  
0. 487364950286984  
-0. 426113805777408  
0. 843890595167297  
1. 46017149183476  
8. 337487607093497E-002  
-0. 102163663829437  
0. 682058059970494  
-2. 36002151578762  
1. 05782131092986  
0. 244493991218140  
-1. 56875992604458  
-1. 58243901144577  
0. 273507096455635  
5. 354998597230811E-002  
1. 46407774416669  
0. 909616219912044  
-0. 817966102599211  
0. 425277180593676  
-3. 064963177894425E-002  
2. 35297437177283  
1. 18904544851065  
-1. 82212561795133  
1. 67566280397894  
2. 86576771123204

0. 370095839876772  
-2. 12409469511424  
0. 600022689368533  
5. 41555683574974  
-1. 69739808166029  
0. 655106369084569  
-2. 24106270428536  
-1. 55488508014943  
-0. 815667135812600  
3. 82672840178556  
3. 29317197906930  
-7. 05213933483567  
-1. 15872892657676  
-2. 87819372439482  
-4. 31273376793610  
-2. 19918769702675  
7. 111785814623554E-002  
-8. 07060540515642  
2. 65586948969738  
1. 36428500241647  
7. 41469731249954  
-1. 45465382820055  
-1. 52959542785445  
-1. 58536682859761  
4. 51940105341428  
1. 68025161057494  
0. 153847083607570  
-3. 19181652695610  
0. 355626353232569  
0. 841253725696878  
-1. 78323994786651  
-1. 98410031296058  
0. 354752197065355  
-0. 309481598523281  
-0. 546630383377843  
2. 37415663445416  
-0. 582046249396841  
-1. 53360155805228  
1. 85595117177886  
-3. 03926690528162  
2. 45414837093926  
-1. 09253308969777  
-0. 883378828316640  
-3. 24549913562959  
-0. 157089706854861  
2. 07910575255476

-3. 361731445784422E-002  
-3. 42429830708209  
1. 50585686702426  
3. 49290315600710  
3. 17615991944839  
1. 15330608048634  
8. 081188201203487E-002  
0. 796097588097567  
-0. 112091207729772  
0. 725197823388588  
-0. 160178933870995  
2. 83917496249348  
-0. 233598696409191  
-0. 765053381787916  
-0. 402659392808765  
1. 42996994327533  
0. 397175221820384  
-1. 42781033426394  
-1. 29421493146319  
-2. 35680908319140  
-0. 354756075326055  
1. 36844822909056  
-0. 219374918204265  
1. 27223866775674  
0. 419354620764697  
-1. 19883567606168  
-0. 441145712321875  
-0. 344687489481107  
0. 214860084061349  
0. 998286712006710  
-0. 994812502551851  
-0. 231458014928139  
-0. 464940282299518  
-1. 02306859812718  
0. 548499013476675  
0. 487553887791532  
-0. 648539182690672  
0. 903687757222380  
0. 359493195651565  
1. 71520648583935  
-0. 951489475907918  
3. 55960111664522  
0. 248516475569615  
0. 619711472081854  
-0. 334516902521906  
-4. 027463931846700E-002

0. 730099197767322  
1. 20707669999351  
1. 36586936239168  
-0. 560181582023601  
0. 280548060119836  
1. 85410702631548  
0. 922556668145487  
-0. 589508640186202  
-0. 364793108137768  
3. 084543145771118E-002  
0. 229123288602196  
-4. 884948309872183E-002  
-0. 143560085030330  
0. 802898837294481  
1. 33348694655762  
-1. 36799626248056  
0. 443872538556427  
0. 105883824668693  
-0. 996445183423332  
1. 05365396986079  
0. 769232389576952  
-0. 203165117383508  
0. 534104065663768  
0. 104161767685076  
1. 04443431955936  
-0. 260290744639256  
0. 274274509313511  
-1. 30922127739762  
-1. 03159356573398  
2. 823627872494169E-002  
-3. 01603448904655  
-0. 612671422341744  
-2. 43477951544305  
-0. 536208959188840  
-0. 883021112046926  
2. 55533688042855  
-1. 70913238543293  
1. 31131543683911  
3. 35018276348185  
-1. 59211575360436  
5. 144751655924672E-002  
-0. 605854020366603  
2. 05944291813706  
1. 76185042415361  
-0. 919812710393816  
-1. 00194678905366

-1. 43063391077057  
-1. 12206467424581  
1. 38258540772402  
-2. 01231981263077  
-0. 900880974652929  
-0. 858260771606060  
2. 06017172945453  
3. 35796859472684  
0. 286739018838095  
-1. 40380110542680  
-1. 25633709610578  
-0. 206853400693463  
-2. 59466528988492  
-0. 367014282706838  
-2. 24638248633086  
1. 40600022974167  
0. 634369381263426  
-0. 846199404412542  
0. 300384291969485  
9. 134385943891873E-002  
0. 902651429737055  
-1. 45056512933438  
0. 385427633555830  
1. 043702570052520E-002  
-1. 97319549855328  
0. 253359924729107  
2. 82842849954454  
-2. 20674321570968  
-0. 445610852180353  
-0. 160742068670322  
-1. 87203227334371  
0. 180040095700071  
-7. 047474170660428E-002  
0. 199666684005024  
-1. 27294645671242  
0. 232014695084808  
0. 228409460355002  
3. 87241918528020  
-9. 285060838782928E-002  
-1. 95654075462327  
-0. 336401379697255  
5. 552957615493453E-002  
-1. 39648700927689  
-3. 202869985392342E-002  
-0. 438440606597788  
1. 37157828843331



1. 67022174255108  
1. 30617158311075  
9. 238501010188394E-002  
0. 207482770888332  
8. 027998068642255E-003  
-1. 78506892809397  
0. 115095240896623  
0. 612234973426016  
0. 193193069488866  
-0. 627090202125979  
0. 718395639830269  
1. 68652639631808  
-1. 46773713609129  
0. 347236309847509  
-0. 630938915484976  
0. 129433945808820  
0. 148723040284593  
0. 288983232328292  
-1. 55407154467366  
2. 091086992000709E-002  
-0. 129538855120094  
1. 42493469030297  
1. 23158316686029  
1. 04396617510186  
-0. 628513326831641  
-2. 02294548550006  
0. 334847747761726  
0. 374965526237958  
-2. 79921015983995  
-1. 16792113986616  
-2. 16063586317303  
0. 378074335315406  
-0. 741645375745822  
0. 231099083785002  
-0. 301262990893862  
-0. 673302709528096  
0. 839366869330255  
-1. 77657211452313  
-0. 561718137314902  
2. 18272563871239  
-0. 511649644042630  
-0. 601000135364755  
-0. 128040918467807  
0. 123395046583036  
-0. 575768514170174  
-0. 438739737251612

0. 134907513763403  
0. 944511751308184  
-1. 66139659225754  
0. 558020141610307  
0. 538573898316609  
-0. 844759969051590  
5. 469118043140007E-003  
-1. 36089027115412  
-0. 872791983252659  
0. 928490002836398  
0. 607792775812012  
-2. 22169737969459  
-1. 27313699810411  
3. 46579227236969  
1. 46094305191483  
0. 336281043247797  
0. 316712862360822  
-1. 55924531284648  
2. 85856064788651  
0. 629187484926852  
-0. 561371775697634  
-1. 34822668480787  
2. 05205547103370  
1. 66909796403193  
-1. 21579438033592  
-1. 19312753294961  
-0. 323093638853801  
0. 682055113973671  
0. 365976468666143  
0. 942129889769251  
-0. 305869318546994  
0. 681821357192334  
1. 94677474290166  
1. 40197742204741  
0. 775362002848667  
-1. 35800091724241  
1. 40194668552490E-002  
0. 917512979221692  
-1. 02787158639887  
-1. 76422281409307  
-0. 954815956272757  
0. 470982483879883  
1. 45386756930601  
-1. 03611589442133  
-0. 888035344182794  
-0. 391652235100510

1. 52379392062742  
-1. 65997854320219  
0. 341435285679900  
-1. 82016704143305  
-0. 518842911048031  
2. 02668388576399  
1. 30352771798626  
3. 02737672834016  
-1. 07697103616320  
-0. 780939910531852  
0. 817050885512836  
0. 866342604355592  
-1. 96343389241351  
-0. 188179621242495  
-0. 268862139780165  
-1. 52179572686298  
-1. 28857604878672  
-1. 11562460164979  
0. 732464900919600  
-1. 61148077151372  
1. 85584313983147  
-3. 75737582494550  
-1. 04398103965576  
-1. 57438751257660  
-0. 956944655959360  
-1. 82257425254822  
-0. 628470439182124  
4. 41270658817575  
0. 850831837940569  
2. 59314260734702  
-0. 868765985390799  
-0. 640017330482573  
1. 46239773208720  
2. 14601788619813  
1. 76073160836484  
-0. 545717983735179  
0. 606864801313011  
-1. 85627023706013  
-0. 216399015126001  
1. 50700143759289  
-2. 68411417266236  
-2. 33778911795435  
1. 03259155720741  
0. 838988550723731  
3. 78479538040011  
0. 747838044678057

-0. 163685696620783  
0. 431536062789809  
2. 57144550996332  
4. 13786739293632  
-0. 309192479504828  
1. 64346687686731  
-0. 453645133108463  
-0. 566998418822680  
-0. 660287318785884  
-1. 00404481114433  
0. 393199061373511  
-0. 795535140160296  
-0. 445233424209110  
-0. 333260608859902  
-0. 727562523015579  
0. 685359124862795  
0. 995575425920500  
-1. 67910275235343  
1. 90851009105053  
-1. 77062699627701  
8. 081894181671502E-003  
0. 764549771939844  
1. 322046141261152E-002  
0. 865550294286207  
1. 05998962515274  
-1. 22594739293807  
1. 34967591662845  
1. 71155380949721  
-0. 417258768726983  
0. 862116978074920  
1. 05139584578209  
0. 589115101654775  
6. 662372556530216E-002  
0. 833535949523703  
0. 207381101558354  
2. 33876670361516  
-1. 75126026634568  
-0. 333332217696509  
-3. 10064160984395  
2. 08651097535670  
-0. 158818972883021  
-0. 213787152827365  
1. 97094318152356  
2. 00607739236355  
-0. 291057358654504  
0. 144604487898663

-2. 31474876166899  
-2. 98200894599628  
-1. 94609243963360  
2. 29978295604514  
-0. 802433461247031  
-2. 32613525408261  
1. 02400844953929  
4. 71607955137276  
-2. 97504218272680  
-1. 37486450268968  
3. 12004387569844  
-2. 20807620573825  
5. 47617528620238  
2. 63114049306358  
0. 422609374672231  
2. 14117338169271  
1. 95739568110794  
4. 50375283310434  
0. 428419008960159  
1. 13725231792823  
-1. 29466817076755  
0. 134330211625755  
-1. 56982740013157  
0. 149156309610259  
0. 540101072999340  
0. 237822651737183  
-0. 151993136562811  
-0. 505610871464432  
0. 710426513983502  
-1. 38897825748750  
-0. 683425273910935  
-0. 292418029110564  
-1. 25088218603812  
0. 304772145549749  
0. 474259378610653  
2. 50107685868633  
1. 747923220487963E-002  
-0. 815408610441501  
1. 04498536556448  
0. 511885635217462  
-1. 77274718215936  
0. 738863163192158  
-0. 368697191843617  
1. 54080943734144  
-1. 87175471469117  
1. 42130718827235

0. 975631771528907  
-0. 908972733328406  
-3. 14374705390695  
0. 674508985551143  
-1. 15048425368310  
-2. 12156892083249  
0. 728429785332176  
2. 75283954608319  
-0. 919116732150505  
-4. 71026160661754  
-5. 54352191721000  
-1. 19711638455504  
-1. 79286897042675  
4. 85345280318443  
-6. 79009329399999  
-1. 19034910609218  
3. 25193468896456  
-1. 82792528538346  
-4. 39488277209574  
1. 53455418296462  
4. 25480289416624  
-4. 16474890761141  
1. 06720188843040  
1. 70653211544381  
-5. 87858596352961  
-4. 92509669479423  
-2. 12959643653728  
-1. 19346973388390  
-2. 22185785176181  
-0. 398787809672806  
3. 15203458563913  
0. 349616460085206  
1. 02560220436279  
-1. 68298539037055  
0. 950673182529034  
-1. 36834288848360  
-1. 66359251555994  
0. 214335692801727  
-1. 05233303706545  
1. 45126343967741  
0. 210564428707774  
0. 226002523105013  
0. 708647087142462  
-0. 469242136405202  
-0. 577647301453085  
1. 35707830773750

-0. 164218952448138  
-8. 131417059754278E-002  
-0. 663023402601308  
-2. 139095973319455E-002  
0. 568817603067444  
-0. 830415977745746  
-0. 862545664956776  
0. 685904167031483  
-1. 94656402121418  
2. 322862686436859E-002  
0. 778839297940436  
0. 881318341556374  
0. 297486209747457  
0. 612800413583660  
0. 391618837336665  
1. 97085535002238  
6. 376234614118742E-002  
-0. 607422472816540  
1. 25787420115673  
0. 886698855480267  
1. 22111713333087  
-0. 533754650997382  
-0. 154430016170798  
0. 543126803939529  
-0. 404323324915783  
-0. 313220233973466  
0. 168264580553135  
-0. 683209493340988  
-3. 858651373152786E-002  
1. 09980201516597  
-0. 315654951567569  
-0. 632575629062657  
0. 807652889789267  
0. 657193970727298  
-5. 101575985122887E-002  
-1. 24198490349842  
-0. 191841839087978  
0. 751962753045414  
-0. 225005633176979  
0. 251313748513726  
-0. 261702144295508  
-0. 944799710724144  
-2. 885133021940782E-002  
-0. 788925440923411  
0. 180907440600514  
-1. 41289482599562

0. 516737905264577  
-1. 18317891435167  
-1. 23296326092451  
-0. 399494204524123  
-0. 514836420963161  
-0. 458406397614610  
0. 139795728662642  
1. 58911964794367  
1. 35757632687715  
0. 680296014878775  
-0. 416098255355639  
-0. 125659212236148  
0. 513495853076604  
-0. 668265852538662  
-1. 01360424097589  
4. 741173957430241E-002  
1. 39890157740361  
0. 613631737383741  
0. 523592691405066  
-0. 911248472425169  
0. 506517389152749  
-0. 972907640152847  
-0. 746050559302975  
-1. 26186858964742  
1. 08572777347395  
0. 231588765758176  
0. 652831074088576  
-0. 533478463773091  
1. 57138626364712  
-0. 675916363470746  
0. 593813398659831  
-0. 850438223514948  
-0. 943982980163113  
0. 518834217354191  
-0. 771755530687956  
1. 12485284853295  
-0. 144089167080971  
-0. 427156043350697  
0. 223072531184195  
0. 874134697636857  
-0. 536738211431358  
-2. 74238977487266  
-1. 28024497507981  
-0. 576836998576240  
-1. 66514000112215  
2. 132028869756691E-002



-0. 206261430925338  
0. 691556155447065  
-1. 05076581658014  
-1. 60358006260150  
0. 353303728798100  
1. 85795482234702  
-0. 101237435951556  
-0. 111804510043118  
-0. 765285083750565  
-1. 83274680571933  
0. 250748161082235  
-0. 661933813495051  
0. 917859272838978  
0. 398134689803068  
-2. 01573528746335  
0. 987657216501137  
2. 06935429768463  
-2. 28579872352110  
6. 070037060054187E-002  
0. 452130827619718  
-1. 40970086417213  
0. 408521624482476  
-0. 822056163431864  
-0. 582596105643360  
0. 269298595150954  
-0. 719181055794124  
-1. 36657630917112  
-0. 948232822103051  
0. 591851699021729  
-1. 27924646290334  
-1. 06820966694731  
0. 552982693467728  
-1. 50833347919979  
-1. 80749872329469  
0. 532841383974628  
2. 37338986697788  
1. 09535806071264  
-0. 926763865455170  
0. 237907447015683  
0. 589655557278987  
1. 42229850368311  
1. 32278735298049  
6. 704627609432320E-002  
-5. 379940510381531E-002  
1. 33946870225869  
-1. 58938355278121

1. 32826497551951  
1. 09733147931918  
-0. 951077721041930  
-0. 994431953816676  
1. 50456588237712  
3. 55941946276805  
1. 69829040646990  
-0. 130443619366956  
1. 46794485378084  
-1. 91013273761402  
2. 21804646256494  
2. 19090999469545  
0. 333871263918818  
1. 69783832228863  
0. 692164989985798  
-0. 108659231210435  
-0. 122754087123561  
-1. 14457904510863  
0. 978736882918752  
2. 32667495500429  
-1. 24473755593987  
2. 01331833068031  
-8. 499780486591141E-002  
-1. 27904089375725  
1. 00703174395643  
-1. 28597557094915  
-0. 914143494149969  
1. 77414143771362  
-7. 247749965706143E-002  
-3. 208099693030240E-003  
0. 109497770376118  
0. 969477581407775  
-0. 554713160765726  
-1. 05191245041028  
0. 392291394197500  
0. 341915880229957  
-0. 591658863702216  
-0. 232688424917609  
-0. 735518634912437  
1. 02322047727249  
0. 176994660758346  
-0. 510318321510512  
0. 179407726433950  
-1. 22125568548629  
-0. 763654495984629  
-0. 456774544237517

-0. 533926202172645  
-0. 977716506045611  
0. 568108531718634  
8. 369161166220314E-002  
-0. 210171941751649  
-1. 19777415508595  
0. 564668042997638  
1. 06506170440041  
1. 11746650979820  
0. 910790391954655  
1. 00143251502272  
1. 40357906887077  
2. 619111762107637E-003  
4. 554890029902671E-002  
1. 84854194992974  
-0. 688136983771164  
0. 370406770011814  
-0. 405297464668008  
-0. 552363405586837  
4. 561557089993246E-002  
0. 255297420305737  
0. 478741096373079  
0. 426022198695237  
-3. 529559464170240E-003  
0. 265082759928303  
-1. 69770869423635  
-0. 721766222366245  
0. 224817911116573  
-0. 184819038492451  
0. 103650678667483  
-0. 826417728065699  
0. 973629649830415  
-0. 430354214179761  
1. 27155794492505  
-1. 39987872526896  
0. 170625063447163  
-0. 814401171081104  
-0. 983579054936436  
-1. 19951163643616  
-1. 02919011290832  
-1. 12612180345454  
-1. 43270789836385  
0. 643671921179614  
0. 902646444310812  
-0. 764609932288756  
-1. 85064191019177

-4. 65423106819959  
2. 42709247671742  
1. 53869013531433  
2. 79289875973889  
1. 82250714364271  
-0. 745267287287098  
-1. 07425877991420  
-0. 677197743014362  
-1. 63787918648854  
-2. 19676455016627  
0. 101764597250429  
0. 470443465058682  
0. 349384295074638  
-1. 35515593559280  
-0. 889927252501026  
0. 877426815547853  
1. 56085553351491  
-2. 79148379277513  
-0. 114857567957871  
-1. 09889250306865  
1. 46378226472436  
0. 549408261933029  
-0. 841154956518323  
0. 515330999444479  
0. 834884922964433  
5. 12041017614312  
-1. 54419426708648  
7. 320349996890035E-002  
0. 754126963056118  
-0. 841899264830927  
-7. 369984748547569E-002  
-1. 27500490417430  
0. 620315584955145  
1. 04001609970304  
0. 835482022900415  
1. 15148592649394  
-0. 285784108669400  
8. 197692965415802E-002  
0. 777018754070414  
0. 311793897285728  
0. 735132450846391  
0. 765059120737568  
-0. 531002962698457  
-0. 903019518291651  
0. 449929763181600  
1. 91399471678735

-0. 120657216158739  
-0. 892557347169757  
9. 018490391237284E-002  
1. 05855461917349  
1. 38768939903658  
1. 13048304718673  
0. 598146067424579  
0. 362666689591822  
0. 535849891970611  
0. 741549468751980  
-0. 489112820394755  
2. 10336334051598  
-1. 09289688712022  
-7. 773080083507626E-002  
0. 839478759058609  
1. 26909999844806  
0. 534337192622331  
-2. 41064112936481  
-1. 96583318157104  
-2. 13438048609819  
-0. 824329817716971  
2. 56866324308473  
1. 08253447708701  
-0. 609337779136276  
0. 734836864362109  
-0. 199281033360754  
-0. 437462870885597  
-0. 783077120110553  
1. 36718534853124  
0. 897667249409033  
-0. 503193288989430  
-1. 18602587873630  
-1. 74129995473662  
-0. 470513311899246  
0. 728999628247372  
1. 09210805204016  
-0. 548568364360674  
1. 16792244370177  
-1. 06523274247543  
0. 820952014507816  
0. 601570135505117  
-0. 343246029943436  
-2. 67008792057413  
1. 27546129829507  
-0. 118905845879411  
1. 52179880976509

-1. 44432307387292  
0. 129613223427528  
0. 336710958513287  
-1. 66068976350665  
0. 523186561666752  
-0. 586398987245301  
0. 128137818868163  
2. 18968315194498  
-1. 09500543840632  
0. 507919934551214  
0. 841107147772030  
1. 30716081359888  
-0. 970861624339682  
-1. 86699509939261  
-0. 172936340473502  
-1. 84451684595113  
0. 912228832351849  
-0. 624882253647443  
-0. 988152725720336  
0. 984875809581461  
0. 472819406389871  
1. 47677442561134  
0. 218576728765803  
1. 33154364732356  
-1. 00008556894333  
-0. 192207068859931  
-4. 03340748245287  
0. 768643083009231  
-0. 585389680698492  
1. 08236188358474  
1. 18204119477579  
0. 935619575804204  
0. 907090595854005  
-1. 22524994868057  
-0. 804320957161863  
-2. 67445474249673  
-0. 320332662841552  
0. 531953643380634  
-0. 505468908420454  
1. 02003670698919  
0. 293384862150454  
8. 775419722934802E-002  
-2. 28164171338718  
-3. 67249175443917  
2. 15067388086165  
-3. 44762148818220

3. 48085608872102  
5. 062990334676742E-002  
-0. 491096192621380  
1. 24014286646130  
1. 22146561130073  
1. 26886685860098  
0. 847317626483538  
0. 673080191833881  
7. 926289203792490E-002  
7. 482895424718920E-002  
0. 381888163014429  
0. 218092136514772  
0. 264798666148638  
0. 160390845111346  
2. 69119514676093  
1. 15010674214283  
2. 79612410917903  
0. 585940873168150  
-0. 820870929297372  
-4. 96457280476728  
5. 04525932180028  
2. 82434025843864  
-4. 19191344502222  
2. 31693125661069  
1. 10004806776259  
-1. 66015166830720  
-2. 58013470484605  
2. 10712356294306  
-0. 387212498523575  
-2. 28157762009828  
5. 33541371296394  
5. 28337612741198  
1. 62341592793702  
2. 34785879055251  
1. 39922965397539  
1. 09850303023125  
-1. 45044438362815  
-0. 339105752742386  
-0. 225984890018492  
1. 22740403820028  
0. 145955911209937  
0. 570846654670258  
0. 696374439410045  
-1. 48773323033645  
0. 536312744709580  
-0. 371564654557511

6. 269487207963553E-002  
-0. 845570289360228  
-0. 214980070359611  
-0. 836321944925881  
2. 24802433878933  
-0. 366402756772281  
-1. 27929954348457  
-0. 183804218646258  
0. 471330834320339  
0. 502298880293818  
-1. 57895821630620  
-0. 266724369458181  
0. 346501864553966  
0. 122362618691476  
1. 73221142026860  
-0. 264660318994573  
0. 396509151352282  
0. 972280167732850  
1. 97895645142537  
1. 18833553353781  
0. 118556602957296  
-1. 44117140427340  
0. 119025320664102  
-0. 565811233832878  
0. 846558481439573  
0. 901607917361040  
-0. 513712029885323  
-3. 06426538348013  
-0. 102725358813110  
2. 26633347817387  
1. 06273693334709  
0. 293574205955448  
0. 885173446230136  
-1. 83396471754353  
3. 12234928746095  
-1. 23893825998196  
1. 16146309256036  
-1. 68072828273914  
1. 48940524910492  
1. 17260704974008  
-0. 366571499649797  
0. 159144829086857  
-7. 251938630485275E-003  
0. 779954648406602  
0. 326149166895925  
2. 65130886708065



9. 555552888634742E-003  
-1. 30177661897611  
2. 29717017929698  
-0. 414440154270889  
-0. 265738581452541  
-4. 572911969545534E-002  
-0. 436726083091678  
1. 86842561827344  
0. 923984539695468  
-0. 986178562875014  
-1. 27994476453417  
-1. 00339205781205  
1. 58205246487431  
1. 45286766694444  
3. 17463773005483  
0. 124761706294268  
1. 68384339119172  
0. 833536265161136  
-1. 61748328792587  
-2. 52122551367678  
-2. 33980927426745  
0. 271789583026671  
-0. 766389795351190  
2. 25717456636421  
1. 80620182636177  
0. 778461224657998  
1. 09216219736195  
2. 48120920874429  
-1. 53491466722174  
-2. 92104156819464  
0. 637805151552672  
-1. 38902429392964  
0. 171949347703298  
-2. 14898906186018  
-0. 862299194779264  
0. 166794338436124  
0. 796848772129326  
2. 16228704652902  
-1. 45064690759436  
-1. 82125910418377  
0. 247969270059943  
0. 852890340495532  
-0. 293229799252122  
0. 162136693999271  
0. 567002976935283  
-0. 445844909841649

-0. 526472230657720  
1. 00795296012605  
-0. 443360503392245  
-0. 367842645206358  
-0. 785986450055640  
-0. 413402999100221  
1. 34750897984982  
0. 338363744823551  
0. 668379505062335  
0. 479488547085564  
-0. 602928288423336  
-0. 400604781242087  
-1. 22794971805536  
-0. 880642149324557  
-0. 418585650088539  
1. 12368813197730  
-1. 81998619032409  
0. 938556456366046  
-0. 184119933632973  
-0. 897118118351101  
0. 668536655201275  
0. 110325176526597  
-0. 877570910699685  
2. 23869437091929  
0. 887522845217756  
0. 305332109744183  
2. 19264828926576  
1. 01015053578538  
1. 86159150064839  
-6. 134564417054061E-002  
-0. 291376613767510  
-1. 33771121905955  
0. 895069146456150  
0. 415223504221584  
9. 465247599243139E-002  
1. 35454084774433  
1. 88613019909949  
0. 248795085644278  
-0. 187793011662210  
1. 43791127541884  
0. 541666607453988  
-0. 386104955559182  
-0. 285390278014693  
1. 90498771186417  
-2. 76367042081942  
-0. 636826329044057

1. 59247238413693  
-0. 378698276491974  
-0. 509167023740632  
-1. 92381020683737  
1. 45118789884772  
-1. 00138059746958  
-0. 271714652365879  
-0. 441667924222159  
0. 366277641487735  
1. 07507029075683  
0. 540344490217711  
-1. 66236670062663  
-0. 107224047459557  
-1. 08108852420832  
0. 601877775892575  
0. 818875143592371  
-1. 48238420292597  
-0. 298172096965472  
3. 587800485783529E-002  
-0. 189230538374334  
0. 260114139983770  
0. 961097340843253  
-0. 464375478070203  
0. 802445665266448  
-2. 00913629530702  
1. 45925932617457  
-0. 233038800724898  
-1. 17519271202549  
0. 725878147409308  
-1. 75455959473748  
-1. 82886948189607  
-7. 010527802726285E-002  
-1. 39828184846246  
-1. 36143678332812  
1. 70078567394195  
-2. 61055830149768  
-0. 588420296744549  
-1. 040902543238419E-002  
-0. 759164630287981  
1. 46808397253679  
-1. 90148607031061  
2. 16020462252367  
0. 686927097601258  
0. 557673819573793  
6. 107896725678947E-002  
0. 116292536472254

-1. 47405844215653  
1. 63083908684525  
0. 300063171926732  
-0. 249123200920314  
6. 702172310336776E-002  
-0. 525260953091955  
-0. 595475441046305  
3. 625769379190535E-002  
-1. 54681028294773  
-0. 921096490288896  
0. 980006464094129  
-0. 651562306892806  
1. 73822844686917  
0. 746671817044251  
-4. 161969534334178E-002  
1. 05813061391572  
1. 32934827006669  
2. 57123275305663  
-1. 11361727038530  
2. 05454429078476  
1. 57604354442302  
0. 699851424517102  
2. 537752675893536E-002  
-7. 035677440728901E-002  
1. 11939235525419  
-1. 50549230909471  
0. 809964619748589  
0. 679870529682341  
1. 73216690806695  
-0. 549446886707735  
-1. 49966792323381  
-2. 77291848815129  
-1. 87989466977371  
-0. 148583646840038  
-1. 11644415391654  
1. 58262551452043  
0. 520057530201604  
0. 935984305411462  
2. 93901945153150  
0. 780041283075982  
0. 132759673355868  
0. 263071320487890  
-0. 430305865064695  
-0. 121571125228316  
-0. 199951444336064  
-1. 02105681267529

-2. 06002942962274  
-1. 47495603502593  
-0. 520679762404063  
0. 556264900292256  
-1. 36874467822973  
-0. 580351181011087  
1. 03469318048755  
1. 12048410921481  
-1. 38540575885607  
-0. 644942931560007  
-3. 442133778649372E-002  
-0. 159599972826951  
8. 931601350455318E-002  
1. 33823855034669  
0. 535429281119230  
-0. 548382733336977  
-0. 773658271545514  
1. 25393059566324  
0. 954781065733048  
-0. 230053200492034  
-0. 803024632012022  
-0. 398405172364700  
0. 736284332550486  
-2. 82882092496455  
0. 248105665066873  
-0. 648931961745981  
-0. 648556101422767  
-0. 608834781945329  
-0. 570489865395259  
-0. 190761343509798  
-1. 36817969854131  
-0. 286102413612988  
0. 734057732288889  
-0. 829636836771837  
-0. 567957843466630  
-0. 305771980522671  
-2. 32114899105950  
-0. 115346708738565  
-0. 873395076984253  
2. 74897145942053  
4. 09208100196280  
1. 01571865970789  
0. 618988417727761  
-0. 844981818585091  
-1. 19581854571720  
-3. 40661796432730

0. 993844645644943  
2. 67595374792297  
-1. 44418641811861  
1. 25214574270037  
0. 184429461939621  
1. 46080799217005  
-0. 599932836539538  
2. 99131312301247  
-1. 02434457327708  
0. 952828056759597  
0. 337819216980245  
-0. 178403707903105  
1. 61878514661673  
-1. 60944046543588  
0. 738682719289922  
2. 15656374833165  
1. 25919575875412  
-0. 485580220195281  
0. 403684672992274  
-2. 88836108741160  
-2. 18825623020754  
4. 295334846257023E-002  
-0. 986306333980140  
1. 92045900855747  
-0. 187964173394001  
-1. 65048758102805  
4. 033045995507210E-003  
0. 869263998423447  
-0. 652474052980114  
0. 433985754438687  
1. 81735372354472  
-2. 64008906808209  
0. 142666883487499  
-0. 595319524029164  
1. 17227276884486  
0. 401285945878367  
-2. 62481958565805  
7. 061075194726460E-002  
0. 353181561104803  
-1. 88470069864098  
2. 89717434855760  
1. 58590989571339  
-0. 802426735920503  
1. 52903843281326  
2. 38343635018179  
4. 16642237735695

-0. 467132535383931  
-0. 856661919522602  
0. 501322594056820  
-2. 01482265521055  
5. 014603553849350E-002  
0. 146838872267023  
-2. 53691989423459  
0. 519807329254643  
0. 413284319533912  
-1. 81261131130534  
7. 760310615498706E-002  
1. 02439773788061  
0. 212097650479840  
1. 64567912393207  
0. 291704661184818  
-0. 770361038203252  
-0. 469088182405440  
-0. 941370736850634  
-0. 141693679772320  
-0. 960013874221275  
-1. 96924220131090  
-3. 37633895699501  
1. 67671470245601  
-2. 02401957474618  
3. 54672627356795  
0. 836455109342482  
-0. 254101749657301  
0. 262455054942947  
0. 361583827428125  
2. 31191632389524  
-7. 539547039471682E-002  
-1. 18741289219301  
1. 07522693771395  
0. 869742716903579  
1. 62816679773087  
-0. 217036813929457  
5. 859674729165966E-002  
0. 803651217038463  
-0. 391702408290641  
0. 830031276184975  
-0. 160035162866550  
-0. 616139265659562  
0. 752127870125810  
1. 14354892608366  
0. 183667041909239  
7. 162847058397655E-002

0. 189026083117661  
-0. 699780039974479  
-1. 90287043351445  
-0. 422621121641347  
-0. 470958456544788  
-1. 784110316932977E-002  
0. 874232511831232  
0. 907496475264901  
0. 554569981687845  
-0. 314210601256911  
0. 824538739063614  
-7. 962360606575579E-002  
6. 375676663102643E-002  
-0. 577279911251915  
0. 840162945663491  
-0. 530000020118805  
-0. 967810850261402  
-1. 21202457549925  
-0. 232168573019705  
0. 743956421938938  
0. 134311672594595  
0. 320751776421136  
0. 482459219502618  
0. 544698347001431  
-0. 168857344721354  
-0. 678375892023447  
-1. 03188439223795  
1. 29366085103843  
0. 494906241932373  
1. 99007854920732  
0. 974410984624267  
-0. 137168955606440  
1. 00539455097135  
1. 51974705796124  
-1. 01533606414009  
0. 148119119179684  
-0. 454677647769787  
0. 801026848691451  
0. 489223074523801  
0. 566875018067936  
-0. 808772518143977  
0. 639878876351719  
0. 190904351492718  
0. 335002963403758  
0. 906575739171759  
1. 14624911599491



0. 481544411341510  
0. 633893216379353  
0. 310176649331345  
1. 29614077792423  
1. 35316010792784  
1. 97784573270009  
5. 80599654070277  
0. 344325869428128  
0. 451175132295205  
2. 26845563792410  
-0. 818903375652945  
-1. 63313573475718  
-2. 60591274365611  
2. 08237612311022  
2. 04470804545352  
2. 31135235839768  
3. 572084589674013E-003  
1. 23060274551623  
-2. 15061265072700  
2. 54989455218710  
-0. 926237549745071  
0. 858854409157990  
-5. 55255229207736  
-2. 17793169723098  
0. 210994551745719  
-2. 11812736315721  
-0. 270394626991306  
-2. 14592375294911  
-1. 33214219644823  
-0. 467304286359162  
1. 88944700737321  
-0. 223504569003497  
0. 914924824932625  
-0. 968150816478640  
-0. 237595032445372  
-0. 419443075455940  
-0. 221201122861226  
-0. 435781428485684  
-1. 34543193964705  
1. 43181812188931  
-1. 58665960092202  
1. 81109888741482  
1. 11001758779478  
-2. 09084007903596  
-1. 97103280269363  
-1. 25398062905872

-0. 858456827500583  
1. 34663995273625  
-2. 17305403223017  
1. 87013098071145  
0. 933178441953773  
-1. 37690455913051  
0. 993365868706737  
0. 137925274891578  
1. 92820240240571  
0. 558986819193861  
0. 650717360735233  
-0. 752385409490998  
-0. 267802254100185  
0. 231271764900845  
0. 838953503827007  
-1. 56171906306401  
-1. 58424735942054  
-2. 874055260206359E-002  
0. 528520768797181  
0. 606741703354233  
0. 206681534825558  
0. 639123552384149  
2. 51219682410995  
-3. 88880882927481  
-0. 251983772143031  
-0. 544042989899057  
0. 185507771861593  
-7. 685425211145140E-002  
0. 644121107044555  
1. 50043883888661  
-0. 325782923731004  
1. 15469915079660  
-1. 74878035120758  
1. 43621438364601  
-0. 509931659685278  
2. 79993174742570  
2. 73069944873497  
-0. 743235586117793  
-2. 16587519915679  
-0. 735026002182828  
1. 26026918852865  
0. 716295484214481  
-0. 859250901787769  
1. 27638660686039  
0. 786786819559917  
0. 678311231869968

-1. 07743561994562  
0. 110601857225103  
0. 175430852781444  
-1. 34952121613432  
-0. 678228379148758  
-0. 500028806729130  
0. 496351100873733  
4. 45967940207451  
-0. 269396341876903  
-1. 99092229588196  
0. 987545664346470  
-1. 48395822590308  
-0. 241775103649780  
0. 186741794354894  
0. 793900121628567  
0. 775566824610831  
-1. 01829083055860  
0. 373588380631537  
-1. 49254618654591  
-2. 23328944237911  
-1. 56337162800705  
-0. 457043805243220  
-1. 83852869406273  
-0. 706840253012996  
0. 169272075823551  
-0. 575993047459757  
  
-0. 133416056353488  
1. 00870666093444  
2. 19981668620514  
1. 95325351377157  
3. 33564393205106  
1. 70075160211845  
-2. 92225188157779  
-0. 707102920746447  
0. 626807538407022  
-1. 55759662700688  
1. 14149302766653  
4. 20056482956524  
-0. 549986184488047  
-2. 79309695851720  
4. 60621083162359  
-0. 466987109934544  
0. 347257323898990  
-1. 07418688279001  
1. 10526481179976

0. 247414600728473  
-1. 57611816154812  
0. 946284863500652  
-0. 388850059126791  
2. 12390054813063  
2. 46371159970027  
2. 41826014282059  
-1. 87311674548660  
-4. 63582657223545  
0. 920315798470372  
-2. 85021659185308  
6. 507736851728986E-002  
-0. 284419539146387  
1. 13325227498856  
-0. 548131684539401  
0. 317635170770245  
-0. 644225056425892  
0. 379726456772902  
0. 601210755709509  
0. 559933780865580  
-3. 96320150191146  
-0. 229874286217453  
2. 47376951337532  
2. 42933154599497  
3. 17686038149851  
2. 34884408629071  
0. 115241044367424  
-1. 52063189965603  
1. 45176726395677  
0. 185321476392611  
1. 69488824262483  
-1. 90183801586351  
1. 52647729839991  
3. 12790490108035  
-0. 731968353296122  
-0. 338742213753711  
-0. 992878747141187  
-1. 34370775547732  
0. 664711829483420  
3. 35385690195249  
-1. 47216637592795  
  
4. 48196473044600  
2. 24390883818858  
2. 99092575044001  
4. 92674992675240

5. 70399833692518  
7. 81572437805877  
3. 67844065831187  
-4. 45840893969240  
6. 80302992490798  
-7. 04762076552612  
-2. 66759039638071  
11. 4930803351644  
-6. 63403606150385  
-5. 55811765820534  
8. 28443105143391  
12. 6287055069261  
6. 59520051252135  
3. 14999776084584  
-5. 00144727979311  
9. 25224172882877  
-4. 16838888796798  
-3. 47546833878442  
-6. 74517179776732  
5. 53059459324696  
2. 72697140534473  
-8. 82604474045254  
-4. 13897167584618  
-10. 6128176786677  
4. 96876125370804  
8. 06355599812209  
-2. 05658870133116  
3. 36581496468020  
5. 43665072624769  
2. 57218300302384  
7. 65692960928881  
-5. 68910881742835  
-8. 94198127627965  
9. 52641239229925  
-8. 17584855854409  
2. 90366922428454  
-2. 94499599180201  
10. 8035149583181  
4. 93913804738445  
3. 36302234023199  
1. 97110640314347  
-3. 18680121132029  
-2. 86344839053968  
4. 38878516398462  
6. 71686791050351  
-6. 66772265633862

5. 26508954882693  
 -1. 03698710321595  
 -4. 32283477513328  
 -3. 81680092647083  
 -8. 39079540123906  
 5. 79738714956142  
 2. 38176246508192  
 -6. 53293714045789  
 7. 68508126542162  
 -3. 75949799231611

2. 10850559097447

|                         |                         |
|-------------------------|-------------------------|
| 0. 108348250000000      | 0. 928360640000000      |
| 0. 519467660000000      | 1. 264585680000000      |
| 5. 061300000000000E-004 | 0. 917910540000000      |
| 9. 816979999999999E-003 | 0. 296058650000000      |
| 0. 118545700000000      | 0. 533686450000000      |
| 1. 300000000000000E-007 | 0. 310949800000000      |
| 5. 940463000000000E-002 | 0. 709091330000000      |
| 1. 696200000000000E-004 | 0. 486565820000000      |
| 1. 698300000000000E-004 | 0. 272111400000000      |
| 9. 625400000000000E-004 | 0. 121795150000000      |
| 2. 831653000000000E-002 | 0. 225490190000000      |
| 0. 000000000000000E+000 | 0. 133533580000000      |
| 5. 618720000000000E-003 | 0. 211165370000000      |
| 5. 600000000000000E-006 | 0. 150655750000000      |
| 2. 096000000000000E-005 | 0. 101124060000000      |
| 2. 996000000000000E-005 | 0. 146962150000000      |
| 2. 000000000000000E-008 | 9. 189258000000000E-002 |
| 9. 000000000000000E-008 | 0. 217123540000000      |
| 1. 087000000000000E-005 | 0. 159609020000000      |
| 1. 278300000000000E-004 | 0. 216988040000000      |
| -0. 312216000000000     | 3. 999428000000000      |

tansig tansig  
 20 - 30 - 60 - 1  
 rmse= 6.4640 meV

Stationary points:

#Reactants: NH3+F

|   |            |            |           |
|---|------------|------------|-----------|
| N | -0. 023584 | -0. 003530 | 0. 934608 |
| H | -0. 023606 | 0. 933685  | 1. 317629 |
| H | -0. 835232 | -0. 472071 | 1. 317719 |
| H | 0. 788002  | -0. 472082 | 1. 317840 |

|                                |                |           |           |
|--------------------------------|----------------|-----------|-----------|
| F                              | -15.354900     | -0.208871 | 0.757817  |
| energy:                        | 1.13519834 eV  |           |           |
| #Complex reactant:             |                |           |           |
| N                              | 0.041252       | 0.022694  | -0.016997 |
| H                              | 1.019276       | 0.022688  | -0.249855 |
| H                              | -0.447750      | -0.824323 | -0.249792 |
| H                              | -0.447771      | 0.869665  | -0.249915 |
| F                              | 0.041255       | 0.022836  | 1.926768  |
| energy:                        | 0.53823933 eV  |           |           |
| #Transition states:            |                |           |           |
| N                              | 0.075198       | -0.003642 | 0.071739  |
| H                              | 0.493442       | -0.845866 | -0.299223 |
| H                              | 0.494885       | 0.837269  | -0.300571 |
| H                              | 0.049452       | -0.002787 | 1.111017  |
| F                              | 1.452717       | -0.003534 | 1.681805  |
| energy:                        | 0.62530026 eV  |           |           |
| #Complex product:              |                |           |           |
| N                              | 0.021036       | 0.000000  | -0.016159 |
| H                              | 0.019697       | 0.000000  | 1.005019  |
| H                              | 1.004313       | 0.000000  | -0.291790 |
| H                              | -1.374443      | 0.000000  | -1.075687 |
| F                              | -2.122128      | 0.000000  | -1.643369 |
| energy:                        | -0.43718818 eV |           |           |
| #Products: NH <sub>2</sub> +HF |                |           |           |
| N                              | 0.040499       | 0.009759  | 0.040825  |
| H                              | 0.040090       | 0.009827  | 1.065800  |
| H                              | 0.040412       | 1.008281  | -0.190564 |
| H                              | -15.063420     | 0.029946  | 0.036161  |
| F                              | -15.066970     | 0.035425  | 0.953738  |
| energy:                        | -0.00205199 eV |           |           |
